# Supplementary material for: Fused in sarcoma silences HIV gene transcription and maintains viral latency through suppressing AFF4 gene activation
Source: Retrovirology. 2019 Jun 25;16:16. doi: 10.1186/s12977-019-0478-x (PMC6593535; doi:10.1186/s12977-019-0478-x)
Supplement: Supplementary file 2 — Additional file 2. Summary of MS analysis - HA-HFF4-full-length. [file 12977_2019_478_MOESM2_ESM.xlsx]

## Sheet: Sheet1
Accession	Description	ΣCoverage	Σ# Proteins	Σ# Unique Peptides	Σ# Peptides	Σ# PSMs	Score A2	Coverage A2	# Peptides A2	# PSM A2	Score A4	Coverage A4	# Peptides A4	# PSM A4	# AAs	MW [kDa]	calc. pI
47168708	Chain A, Structure Of Human Alpha-Galactosidase	24.87	1	0	4	111	2168.39	24.87	4	111					398	45.322	5.37646
	Sequence	# PSMs	# Proteins	# Protein Groups	Protein Group Accessions	Modifications	MH+ [Da]	A2	IonScore A2	Exp Value A2	A4	XCorr A4	# Missed Cleavages
	LFMEMAELMVSEGWK	105	4	4	4504009;P06280;47168708;269914455;295789486		1800.84	High	103.69	3.0032e-08			0
	QGDNFEVWERPLSGLAWAVAMINR	2	4	4	4504009;P06280;47168708;269914455;295789486		2759.37	Medium	54.98	0.00442888			0
	TPTMGWLHWER	1	4	4	47168708;269914455;295789486;4504009;P06280		1413.67	Low	29.88	0.871706			0
	IVDVAGPGGWNDPDMLVIGNFGLSWNQQVTQMALWAIMAAPLFMSNDLR	3	4	4	4504009;P06280;47168708;269914455;295789486		5359.64	Low	24.94	1.66165			0
269914455	Chain A, Human Alpha-Galactosidase Catalytic Mechanism 2. Substrate Bound	24.5	1	0	4	111	2168.39	24.5	4	111					404	46.1004	6.11279
	Sequence	# PSMs	# Proteins	# Protein Groups	Protein Group Accessions	Modifications	MH+ [Da]	A2	IonScore A2	Exp Value A2	A4	XCorr A4	# Missed Cleavages
	LFMEMAELMVSEGWK	105	4	4	4504009;P06280;47168708;269914455;295789486		1800.84	High	103.69	3.0032e-08			0
	QGDNFEVWERPLSGLAWAVAMINR	2	4	4	4504009;P06280;47168708;269914455;295789486		2759.37	Medium	54.98	0.00442888			0
	TPTMGWLHWER	1	4	4	47168708;269914455;295789486;4504009;P06280		1413.67	Low	29.88	0.871706			0
	IVDVAGPGGWNDPDMLVIGNFGLSWNQQVTQMALWAIMAAPLFMSNDLR	3	4	4	4504009;P06280;47168708;269914455;295789486		5359.64	Low	24.94	1.66165			0
295789486	Chain A, Interconversion Of Human Lysosomal Enzyme Specificities	24.5	1	0	4	111	2168.39	24.5	4	111					404	46.0603	6.11279
	Sequence	# PSMs	# Proteins	# Protein Groups	Protein Group Accessions	Modifications	MH+ [Da]	A2	IonScore A2	Exp Value A2	A4	XCorr A4	# Missed Cleavages
	LFMEMAELMVSEGWK	105	4	4	4504009;P06280;47168708;269914455;295789486		1800.84	High	103.69	3.0032e-08			0
	QGDNFEVWERPLSGLAWAVAMINR	2	4	4	4504009;P06280;47168708;269914455;295789486		2759.37	Medium	54.98	0.00442888			0
	TPTMGWLHWER	1	4	4	47168708;269914455;295789486;4504009;P06280		1413.67	Low	29.88	0.871706			0
	IVDVAGPGGWNDPDMLVIGNFGLSWNQQVTQMALWAIMAAPLFMSNDLR	3	4	4	4504009;P06280;47168708;269914455;295789486		5359.64	Low	24.94	1.66165			0
203282367	Chain A, Crystal Structure Of Human Enolase 1	49.19	1	0	16	38	1053.38	49.19	16	38					433	47.0083	7.38623
	Sequence	# PSMs	# Proteins	# Protein Groups	Protein Group Accessions	Modifications	MH+ [Da]	A2	IonScore A2	Exp Value A2	A4	XCorr A4	# Missed Cleavages
	AAVPSGASTGIYEALELR	2	2	2	4503571;P06733;203282367		1804.95	High	119.53	1.90149e-09			0
	SGETEDTFIADLVVGLCTGQIK	4	2	2	4503571;P06733;203282367	C17(Carbamidomethyl)	2353.16	High	117.31	2.68174e-09			0
	VNQIGSVTESLQACK	2	2	2	4503571;P06733;203282367	C14(Carbamidomethyl)	1633.82	High	111.54	1.10514e-08			0
	GNPTVEVDLFTSK	2	2	2	4503571;P06733;203282367		1406.72	High	96.1	4.01959e-07			0
	SFIKDYPVVSIEDPFDQDDWGAWQK	3	2	2	4503571;P06733;203282367		2985.4	High	85.54	1.94724e-06			1
	LAMQEFMILPVGAANFR	5	2	2	203282367;4503571;P06733		1907.99	High	77.11	3.38775e-05			0
	DATNVGDEGGFAPNILENK	2	2	2	4503571;P06733;203282367		1960.93	High	68.59	0.000112712			0
	DYPVVSIEDPFDQDDWGAWQK	1	2	2	4503571;P06733;203282367		2510.12	High	67.29	5.33691e-05			0
	YISPDQLADLYK	3	2	2	4503571;P06733;203282367		1425.73	High	62.13	0.000931722			0
	DATNVGDEGGFAPNILENKEGLELLK	3	2	2	203282367;4503571;P06733		2743.38	High	60.91	0.00115996			1
	IGAEVYHNLK	3	2	2	4503571;P06733;203282367		1143.62	Medium	50.89	0.0119611			0
	LMIEMDGTENK	2	2	2	4503571;P06733;203282367		1280.59	Medium	47.68	0.00985092			0
	SGKYDLDFK	2	2	2	203282367;4503571;P06733		1072.53	Medium	44.98	0.0248304			1
	AGYTDKVVIGMDVAASEFFR	1	2	2	203282367;4503571;P06733		2176.08	Medium	44.3	0.0528435			1
	SCNCLLLK	2	2	2	4503571;P06733;203282367	C2(Carbamidomethyl); C4(Carbamidomethyl)	1007.5	Low	30.01	1.18372			0
	SGKYDLDFKSPDDPSR	1	2	2	203282367;4503571;P06733		1826.86	Low	10.68	65.1219			2
67464043	Chain O, Crsytal Structure Of Human Liver Gapdh	36.69	1	0	8	21	683.056	36.69	8	21					338	36.3115	8.45557
	Sequence	# PSMs	# Proteins	# Protein Groups	Protein Group Accessions	Modifications	MH+ [Da]	A2	IonScore A2	Exp Value A2	A4	XCorr A4	# Missed Cleavages
	WGDAGAEYVVESTGVFTTMEK	1	2	2	7669492;P04406;67464043		2277.04	High	117.04	9.58534e-10			0
	IISNASCTTNCLAPLAK	2	2	2	7669492;P04406;67464043	C7(Carbamidomethyl); C11(Carbamidomethyl)	1833.92	High	99.5	1.91057e-07			0
	VPTANVSVVDLTCR	2	2	2	7669492;P04406;67464043	C13(Carbamidomethyl)	1530.8	High	80.57	1.46275e-05			0
	VIHDNFGIVEGLMTTVHAITATQK	7	2	2	7669492;P04406;67464043		2595.36	High	74	4.99883e-05			0
	LISWYDNEFGYSNR	2	2	2	67464043;7669492;P04406		1763.8	High	72.47	2.72191e-05			0
	VVDLMAHMASKE	2	2	2	7669492;P04406;67464043		1330.65	High	66.25	0.000256713			1
	GALQNIIPASTGAAK	4	2	2	7669492;P04406;67464043		1411.79	High	64.52	0.000357439			0
	LTGMAFR	1	2	2	67464043;7669492;P04406		795.419	Low	27.08	1.85914			0
347447337	Chain B, Crystal Structure Of Human Nucleosome Core Particle Containing H4k44q Mutation	50.94	1	8	8	33	404.577	50.94	8	33					106	11.6415	11.356
	Sequence	# PSMs	# Proteins	# Protein Groups	Protein Group Accessions	Modifications	MH+ [Da]	A2	IonScore A2	Exp Value A2	A4	XCorr A4	# Missed Cleavages
	TVTAMDVVYALK	2	1	1	347447337	M5(Oxidation)	1326.7	High	75.79	2.88757e-05			0
	TVTAMDVVYALKR	4	1	1	347447337		1466.8	High	70.48	0.000105156			1
	TVTAMDVVYALK	2	1	1	347447337		1310.7	High	66.93	0.000217591			0
	ISGLIYEETR	6	1	1	347447337		1180.62	High	65.83	0.000371084			0
	DNIQGITKPAIR	8	1	1	347447337		1325.75	High	57.42	0.00172041			0
	KTVTAMDVVYALKR	1	1	1	347447337		1594.9	High	56.49	0.00203385			2
	VFLENVIR	5	1	1	347447337		989.578	High	55.75	0.00289567			0
	VFLENVIRDAVTYTEHAK	2	1	1	347447337		2105.1	Low	42.81	0.085826			1
	DAVTYTEHAK	2	1	1	347447337		1134.54	Low	38.21	0.120595			0
	TVTAMDVVYALKR	1	1	1	347447337	M5(Oxidation)	1482.8	Low	22.29	7.33177			1
13786849	Chain A, Human Muscle L-Lactate Dehydrogenase M Chain, Ternary Complex With Nadh And Oxamate	25.68	1	0	7	14	403.463	25.68	7	14					331	36.5343	8.26514
	Sequence	# PSMs	# Proteins	# Protein Groups	Protein Group Accessions	Modifications	MH+ [Da]	A2	IonScore A2	Exp Value A2	A4	XCorr A4	# Missed Cleavages
	LLIVSNPVDILTYVAWK	4	3	3	5031857;P00338;13786849;380765070		1944.12	High	122.17	2.89626e-10			0
	VIGSGCNLDSAR	2	6	6	5031857;P00338;4557032;P07195;13786847;13786849;49259209;380765070	C6(Carbamidomethyl)	1248.6	High	75.83	2.44446e-05			0
	VTLTSEEEAR	3	3	3	13786849;380765070;5031857;P00338		1134.56	Medium	46.59	0.0287356			0
	LVIITAGAR	2	3	3	13786849;380765070;5031857;P00338		913.584	Medium	41.52	0.0353474			0
	SADTLWGIQK	1	3	3	5031857;P00338;13786849;380765070		1118.58	Low	36.6	0.385626			0
	QVVESAYEVIK	1	3	3	5031857;P00338;13786849;380765070		1264.68	Low	34.55	0.610747			0
	TLHPDLGTDKDKEQWK	1	3	3	13786849;380765070;5031857;P00338		1910.96	Low	12.19	85.5795			2
380765070	Chain A, Human Ldha In Complex With 2-((4-(4-((3-((2-Methyl-1,3- Benzothiazol-6yl)amino)-3-Oxo-Propyl)amino)-4-Oxo-Butyl) Phenyl)methyl)propanedioic Acid	25.22	1	0	7	14	403.463	25.22	7	14					337	37.3567	8.27979
	Sequence	# PSMs	# Proteins	# Protein Groups	Protein Group Accessions	Modifications	MH+ [Da]	A2	IonScore A2	Exp Value A2	A4	XCorr A4	# Missed Cleavages
	LLIVSNPVDILTYVAWK	4	3	3	5031857;P00338;13786849;380765070		1944.12	High	122.17	2.89626e-10			0
	VIGSGCNLDSAR	2	6	6	5031857;P00338;4557032;P07195;13786847;13786849;49259209;380765070	C6(Carbamidomethyl)	1248.6	High	75.83	2.44446e-05			0
	VTLTSEEEAR	3	3	3	13786849;380765070;5031857;P00338		1134.56	Medium	46.59	0.0287356			0
	LVIITAGAR	2	3	3	13786849;380765070;5031857;P00338		913.584	Medium	41.52	0.0353474			0
	SADTLWGIQK	1	3	3	5031857;P00338;13786849;380765070		1118.58	Low	36.6	0.385626			0
	QVVESAYEVIK	1	3	3	5031857;P00338;13786849;380765070		1264.68	Low	34.55	0.610747			0
	TLHPDLGTDKDKEQWK	1	3	3	13786849;380765070;5031857;P00338		1910.96	Low	12.19	85.5795			2
13786847	Chain A, Human Heart L-Lactate Dehydrogenase H Chain, Ternary Complex With Nadh And Oxamate	28.83	1	0	8	19	318.886	28.83	8	19					333	36.4841	6.04932
	Sequence	# PSMs	# Proteins	# Protein Groups	Protein Group Accessions	Modifications	MH+ [Da]	A2	IonScore A2	Exp Value A2	A4	XCorr A4	# Missed Cleavages
	VIGSGCNLDSAR	2	6	6	5031857;P00338;4557032;P07195;13786847;13786849;49259209;380765070	C6(Carbamidomethyl)	1248.6	High	75.83	2.44446e-05			0
	LIAPVAEEEATVPNNK	2	3	3	4557032;P07195;13786847;49259209		1694.9	High	74.31	5.39544e-05			0
	IVADKDYSVTANSK	4	3	3	4557032;P07195;13786847;49259209		1510.77	High	72.43	7.68839e-05			1
	SADTLWDIQK	2	3	3	13786847;49259209;4557032;P07195		1176.59	High	69.52	0.000161716			0
	MVVESAYEVIK	1	3	3	13786847;49259209;4557032;P07195		1267.66	High	63.36	0.000609285			0
	SLADELALVDVLEDK	2	3	3	4557032;P07195;13786847;49259209		1629.86	High	62	0.000980602			0
	IVVVTAGVR	2	3	3	4557032;P07195;13786847;49259209		913.583	Medium	46.52	0.0111778			0
	MVVESAYEVIK	2	3	3	4557032;P07195;13786847;49259209	M1(Oxidation)	1283.65	Medium	44.62	0.0381315			0
	GLTSVINQK	2	3	3	13786847;49259209;4557032;P07195		959.553	Low	37.09	0.289252			0
49259209	Chain A, Human B Lactate Dehydrogenase Complexed With Nad+ And 4- Hydroxy-1,2,5-Oxadiazole-3-Carboxylic Acid	28.83	1	0	8	19	318.886	28.83	8	19					333	36.5161	6.23975
	Sequence	# PSMs	# Proteins	# Protein Groups	Protein Group Accessions	Modifications	MH+ [Da]	A2	IonScore A2	Exp Value A2	A4	XCorr A4	# Missed Cleavages
	VIGSGCNLDSAR	2	6	6	5031857;P00338;4557032;P07195;13786847;13786849;49259209;380765070	C6(Carbamidomethyl)	1248.6	High	75.83	2.44446e-05			0
	LIAPVAEEEATVPNNK	2	3	3	4557032;P07195;13786847;49259209		1694.9	High	74.31	5.39544e-05			0
	IVADKDYSVTANSK	4	3	3	4557032;P07195;13786847;49259209		1510.77	High	72.43	7.68839e-05			1
	SADTLWDIQK	2	3	3	13786847;49259209;4557032;P07195		1176.59	High	69.52	0.000161716			0
	MVVESAYEVIK	1	3	3	13786847;49259209;4557032;P07195		1267.66	High	63.36	0.000609285			0
	SLADELALVDVLEDK	2	3	3	4557032;P07195;13786847;49259209		1629.86	High	62	0.000980602			0
	IVVVTAGVR	2	3	3	4557032;P07195;13786847;49259209		913.583	Medium	46.52	0.0111778			0
	MVVESAYEVIK	2	3	3	4557032;P07195;13786847;49259209	M1(Oxidation)	1283.65	Medium	44.62	0.0381315			0
	GLTSVINQK	2	3	3	13786847;49259209;4557032;P07195		959.553	Low	37.09	0.289252			0
263099	Tat binding protein 7, TBP-7=transcriptional activator [human, Peptide, 458 aa]	15.28	1	3	3	5	276.803	15.28	3	5					458	51.5187	5.73193
	Sequence	# PSMs	# Proteins	# Protein Groups	Protein Group Accessions	Modifications	MH+ [Da]	A2	IonScore A2	Exp Value A2	A4	XCorr A4	# Missed Cleavages
	AQDEIPALSVSRPQTGLSFLGPEPEDLEDLYSR	1	1	1	263099		3629.79	High	120.22	1.04595e-09			0
	ILLELLNQMDGFDQNVNVK	1	1	1	263099		2203.14	High	98.94	2.0236e-07			0
	ENAPAIIFIDEIDAIATK	3	1	1	263099		1944.04	High	93.43	6.49046e-07			0
67464424	Chain A, 14-3-3 Protein Epsilon (Human) Complexed To Peptide	34.19	1	5	7	12	275.618	34.19	7	12					234	26.7404	5.021
	Sequence	# PSMs	# Proteins	# Protein Groups	Protein Group Accessions	Modifications	MH+ [Da]	A2	IonScore A2	Exp Value A2	A4	XCorr A4	# Missed Cleavages
	AAFDDAIAELDTLSEESYK	1	1	1	67464424		2087.97	High	108.17	9.82785e-09			0
	AAFDDAIAELDTLSEESYKDSTLIMQLLR	3	1	1	67464424	M25(Oxidation)	3274.6	High	105.35	3.33914e-08			1
	LICCDILDVLDK	2	1	1	67464424	C3(Carbamidomethyl); C4(Carbamidomethyl)	1476.74	High	67.03	0.000301925			0
	EAAENSLVAYK	2	1	1	67464424		1194.6	Medium	46.87	0.0280197			0
	LICCDILDVLDKHLIPAANTGESK	2	1	1	67464424	C3(Carbamidomethyl); C4(Carbamidomethyl)	2695.38	Low	43.59	0.0644164			1
	NLLSVAYK	1	1	1	67464424		907.525	Low	22.78	3.98981			0
	QMVETELK	1	1	1	67464424		977.495	Low	18.19	16.7793			0
126030593	Chain A, Crystal Structure Of Human Paics, A Bifunctional Carboxylase And Synthetase In Purine Biosynthesis	20.24	1	0	5	8	246.699	20.24	5	8					425	46.9019	7.2251
	Sequence	# PSMs	# Proteins	# Protein Groups	Protein Group Accessions	Modifications	MH+ [Da]	A2	IonScore A2	Exp Value A2	A4	XCorr A4	# Missed Cleavages
	ITSCIFQLLQEAGIK	3	2	2	5453539;P22234;126030593	C4(Carbamidomethyl)	1720.93	High	95.25	4.16132e-07			0
	EIVLADVIDNDSWR	2	2	2	5453539;P22234;126030593		1644.83	High	77.89	2.34396e-05			0
	TKEVYELLDSPGK	1	2	2	5453539;P22234;126030593		1478.77	Medium	51.93	0.0110734			1
	IKAEYEGDGIPTVFVAVAGR	1	2	2	5453539;P22234;126030593		2092.11	Low	26.11	3.47963			1
	VELFFKDDANNDPQWSEEQLIAAK	1	2	2	5453539;P22234;126030593		2807.36	Low	17.5	19.7389			1
999892	Chain A, Crystal Structure Of Recombinant Human Triosephosphate Isomerase At 2.8 Angstroms Resolution. Triosephosphate Isomerase Related Human Genetic Disorders And Comparison With The Trypanosomal Enzyme	28.23	1	0	5	8	196.584	28.23	5	8					248	26.5217	6.90283
	Sequence	# PSMs	# Proteins	# Protein Groups	Protein Group Accessions	Modifications	MH+ [Da]	A2	IonScore A2	Exp Value A2	A4	XCorr A4	# Missed Cleavages
	SNVSDAVAQSTR	2	4	4	226529917;P60174;999892;66360365;190613420		1234.6	High	80.42	1.04758e-05			0
	IIYGGSVTGATCK	1	4	4	226529917;P60174;999892;66360365;190613420	C12(Carbamidomethyl)	1326.67	High	67.1	0.000246938			0
	VPADTEVVCAPPTAYIDFAR	1	4	4	226529917;P60174;999892;66360365;190613420	C9(Carbamidomethyl)	2192.07	High	62.26	0.000764676			0
	VVLAYEPVWAIGTGK	2	4	4	999892;66360365;190613420;226529917;P60174		1602.89	High	61.73	0.000842744			0
	IAVAAQNCYK	2	4	4	226529917;P60174;999892;66360365;190613420	C8(Carbamidomethyl)	1137.57	Low	41.19	0.100549			0
66360365	Chain A, Human Triosephosphate Isomerase Of New Crystal Form	28	1	0	5	8	196.584	28	5	8					250	26.6658	6.90283
	Sequence	# PSMs	# Proteins	# Protein Groups	Protein Group Accessions	Modifications	MH+ [Da]	A2	IonScore A2	Exp Value A2	A4	XCorr A4	# Missed Cleavages
	SNVSDAVAQSTR	2	4	4	226529917;P60174;999892;66360365;190613420		1234.6	High	80.42	1.04758e-05			0
	IIYGGSVTGATCK	1	4	4	226529917;P60174;999892;66360365;190613420	C12(Carbamidomethyl)	1326.67	High	67.1	0.000246938			0
	VPADTEVVCAPPTAYIDFAR	1	4	4	226529917;P60174;999892;66360365;190613420	C9(Carbamidomethyl)	2192.07	High	62.26	0.000764676			0
	VVLAYEPVWAIGTGK	2	4	4	999892;66360365;190613420;226529917;P60174		1602.89	High	61.73	0.000842744			0
	IAVAAQNCYK	2	4	4	226529917;P60174;999892;66360365;190613420	C8(Carbamidomethyl)	1137.57	Low	41.19	0.100549			0
190613420	Chain A, Structural Basis Of Human Triosephosphate Isomerase Deficiency. Mutation E104d And Correlation To Solvent Perturbation.	28	1	0	5	8	196.584	28	5	8					250	26.6517	6.90283
	Sequence	# PSMs	# Proteins	# Protein Groups	Protein Group Accessions	Modifications	MH+ [Da]	A2	IonScore A2	Exp Value A2	A4	XCorr A4	# Missed Cleavages
	SNVSDAVAQSTR	2	4	4	226529917;P60174;999892;66360365;190613420		1234.6	High	80.42	1.04758e-05			0
	IIYGGSVTGATCK	1	4	4	226529917;P60174;999892;66360365;190613420	C12(Carbamidomethyl)	1326.67	High	67.1	0.000246938			0
	VPADTEVVCAPPTAYIDFAR	1	4	4	226529917;P60174;999892;66360365;190613420	C9(Carbamidomethyl)	2192.07	High	62.26	0.000764676			0
	VVLAYEPVWAIGTGK	2	4	4	999892;66360365;190613420;226529917;P60174		1602.89	High	61.73	0.000842744			0
	IAVAAQNCYK	2	4	4	226529917;P60174;999892;66360365;190613420	C8(Carbamidomethyl)	1137.57	Low	41.19	0.100549			0
38522	human elongation factor-1-delta [Homo sapiens]	17.08	1	0	3	7	179.81	17.08	3	7					281	31.2019	5.05908
	Sequence	# PSMs	# Proteins	# Protein Groups	Protein Group Accessions	Modifications	MH+ [Da]	A2	IonScore A2	Exp Value A2	A4	XCorr A4	# Missed Cleavages
	IASLEVENQSLR	2	2	2	25453472;P29692;38522		1358.73	High	81.39	1.21488e-05			0
	GVVQELQQAISK	2	2	2	38522;25453472;P29692		1299.73	High	75.96	3.66858e-05			0
	SLAGSSGPGASSGTSGDHGELVVR	3	2	2	25453472;P29692;38522		2185.05	Medium	50.96	0.00852464			0
161761214	Chain A, Crystal Structure Of The Human Laminin Receptor Precursor	19.37	1	0	4	8	173.135	19.37	4	8					253	28.1503	7.10791
	Sequence	# PSMs	# Proteins	# Protein Groups	Protein Group Accessions	Modifications	MH+ [Da]	A2	IonScore A2	Exp Value A2	A4	XCorr A4	# Missed Cleavages
	AIVAIENPADVSVISSR	2	2	2	9845502;P08865;161761214		1740.95	High	99.06	1.54902e-07			0
	FAAATGATPIAGR	2	2	2	9845502;P08865;161761214		1203.65	High	75.73	5.28707e-05			0
	LLVVTDPR	2	2	2	161761214;9845502;P08865		912.552	Medium	40.89	0.0307144			0
	YVDIAIPCNNK	2	2	2	9845502;P08865;161761214	C8(Carbamidomethyl)	1306.65	Low	28.82	1.50431			0
4557976	Chain A, Human Muscle Fructose 1,6-Bisphosphate Aldolase Complexed With Fructose 1,6-Bisphosphate	22.04	1	0	7	12	144.146	22.04	7	12					363	39.2643	8.08936
	Sequence	# PSMs	# Proteins	# Protein Groups	Protein Group Accessions	Modifications	MH+ [Da]	A2	IonScore A2	Exp Value A2	A4	XCorr A4	# Missed Cleavages
	GILAADESTGSIAK	2	2	2	4557976;4557305;P04075		1332.7	High	80.12	1.71233e-05			0
	IGEHTPSALAIMENANVLAR	3	2	2	4557305;P04075;4557976		2107.1	High	56.24	0.00357952			0
	ALANSLACQGK	2	2	2	4557976;4557305;P04075	C8(Carbamidomethyl)	1132.58	Medium	50.09	0.0165651			0
	QLLLTADDR	1	2	2	4557976;4557305;P04075		1044.57	Low	28.42	2.16762			0
	ADDGRPFPQVIK	2	2	2	4557976;4557305;P04075		1342.71	Low	25.45	3.74709			0
	PYQYPALTPEQKK	1	1	1	4557976		1562.82	Low	24	6.3725			1
	GILAADESTGSIAKR	1	2	2	4557976;4557305;P04075		1488.8	Low	19.2	18.9705			1
61680382	Chain A, Human Brain Fructose 1,6-(Bis)phosphate Aldolase (C Isozyme)	7.12	1	0	2	3	131.805	7.12	2	3					365	39.5443	6.87354
	Sequence	# PSMs	# Proteins	# Protein Groups	Protein Group Accessions	Modifications	MH+ [Da]	A2	IonScore A2	Exp Value A2	A4	XCorr A4	# Missed Cleavages
	GVVPLAGTDGETTTQGLDGLSER	1	2	2	4885063;P09972;61680382		2273.13	High	102.83	7.30533e-08			0
	VDKGVVPLAGTDGETTTQGLDGLSER	2	2	2	4885063;P09972;61680382		2615.32	Medium	46.57	0.0320878			1
183448388	Chain A, Crystal Structure Of Human Eukaryotic Translation Initiation Factor Eif5a	34.06	1	2	2	2	112.701	34.06	2	2					138	15.1397	6.17627
	Sequence	# PSMs	# Proteins	# Protein Groups	Protein Group Accessions	Modifications	MH+ [Da]	A2	IonScore A2	Exp Value A2	A4	XCorr A4	# Missed Cleavages
	NDFQLIGIQDGYLSLLQDSGEVR	1	1	1	183448388		2580.29	High	72.09	9.15499e-05			0
	YDCGEEILITVLSAMTEEAAVAIK	1	1	1	183448388	C3(Carbamidomethyl)	2626.3	High	69.03	0.000169573			0
75766275	Chain A, Crystal Structure Of Human Cypa Mutant K131a	18.29	1	1	2	4	111.342	18.29	2	4					164	17.8118	8.1626
	Sequence	# PSMs	# Proteins	# Protein Groups	Protein Group Accessions	Modifications	MH+ [Da]	A2	IonScore A2	Exp Value A2	A4	XCorr A4	# Missed Cleavages
	VNPTVFFDIAVDGEPLGR	3	1	1	75766275		1946	High	69.99	0.000160063			0
	VSFELFADKVPK	1	1	1	75766275		1379.76	Low	25.71	3.20818			1
42543727	Chain A, Crystal Structure Of Catalytic Domain Of Human Poly(Adp- Ribose) Polymerase With A Novel Inhibitor	7.43	1	0	2	2	97.04	7.43	2	2					350	39.1193	7.94287
	Sequence	# PSMs	# Proteins	# Protein Groups	Protein Group Accessions	Modifications	MH+ [Da]	A2	IonScore A2	Exp Value A2	A4	XCorr A4	# Missed Cleavages
	TTNFAGILSQGLR	1	2	2	42543727;388604241		1377.75	High	97.04	3.08546e-07			0
	VVDRDSEEAEIIR	1	2	2	42543727;388604241		1530.77	Low	39.02	0.18742			1
388604241	Chain C, Structure Of Human Parp-1 Bound To A Dna Double Strand Break	5.14	1	0	2	2	97.04	5.14	2	2					506	57.0164	8.19189
	Sequence	# PSMs	# Proteins	# Protein Groups	Protein Group Accessions	Modifications	MH+ [Da]	A2	IonScore A2	Exp Value A2	A4	XCorr A4	# Missed Cleavages
	TTNFAGILSQGLR	1	2	2	42543727;388604241		1377.75	High	97.04	3.08546e-07			0
	VVDRDSEEAEIIR	1	2	2	42543727;388604241		1530.77	Low	39.02	0.18742			1
268612104	Chain A, Nmr Structure Of Dimerization Domain Of Human Ribosomal Protein P2	41.43	1	0	3	5	95.9529	41.43	3	5					70	7.19482	5.31299
	Sequence	# PSMs	# Proteins	# Protein Groups	Protein Group Accessions	Modifications	MH+ [Da]	A2	IonScore A2	Exp Value A2	A4	XCorr A4	# Missed Cleavages
	NIEDVIAQGIGK	2	2	2	4506671;P05387;268612104		1256.68	High	73.77	5.995e-05			0
	KILDSVGIEADDDRLNK	1	2	2	4506671;P05387;268612104		1901	Low	27.5	2.91878			2
	ILDSVGIEADDDRLNK	2	2	2	268612104;4506671;P05387		1772.9	Low	22.8	8.02378			1
542850	heterogeneous nuclear ribonucleoprotein G - human	8.92	1	0	3	4	63.2309	8.92	3	4					437	47.4192	9.59814
	Sequence	# PSMs	# Proteins	# Protein Groups	Protein Group Accessions	Modifications	MH+ [Da]	A2	IonScore A2	Exp Value A2	A4	XCorr A4	# Missed Cleavages
	LFIGGLNTETNEK	2	2	2	542850;56699409;P38159		1435.75	High	59.82	0.00180191			0
	DSYESYGNSR	1	2	2	542850;56699409;P38159		1177.48	Medium	36.83	0.0184149			0
	AIKVEQATKPSFESGR	1	2	2	56699409;P38159;542850		1747.93	Low	24.33	5.55201			1
166007160	Chain C, Solution Structure Of Human Immunoglobulin M	4.4	1	1	3	51	58.3587	4.4	3	51					523	56.6663	8.41162
	Sequence	# PSMs	# Proteins	# Protein Groups	Protein Group Accessions	Modifications	MH+ [Da]	A2	IonScore A2	Exp Value A2	A4	XCorr A4	# Missed Cleavages
	DTLMISR	38	1	1	166007160		835.436	Medium	50.15	0.0159534			0
	DTLMISR	9	1	1	166007160	M4(Oxidation)	851.429	Low	42.54	0.0844192			0
	VTVLGQPK	2	1	1	166007160		841.515	Low	30.09	0.3964			0
	ALPAPIEK	2	1	1	166007160		838.502	Low	29.81	0.376883			0
263098	Tat binding protein 1, TBP-1=transcriptional activator [human, Peptide, 439 aa]	7.74	1	0	2	2	55.0509	7.74	2	2					439	49.0374	5.18604
	Sequence	# PSMs	# Proteins	# Protein Groups	Protein Group Accessions	Modifications	MH+ [Da]	A2	IonScore A2	Exp Value A2	A4	XCorr A4	# Missed Cleavages
	TMLELLNQLDGFQPNTQVK	1	2	2	263098;21361144;P17980		2189.12	High	58.18	0.00242976			0
	QTYFLPVIGLVDAEK	1	2	2	21361144;P17980;263098		1692.92	Low	32.79	0.658153			0
1421609	Chain A, X-Ray Structure Of Nm23 Human Nucleoside Diphosphate Kinase B Complexed With Gdp At 2 Angstroms Resolution	25.17	1	0	3	4	44.55	25.17	3	4					151	17.1559	8.41162
	Sequence	# PSMs	# Proteins	# Protein Groups	Protein Group Accessions	Modifications	MH+ [Da]	A2	IonScore A2	Exp Value A2	A4	XCorr A4	# Missed Cleavages
	GDFCIQVGR	1	4	4	1421609;37928159;116667867;311772088	C4(Carbamidomethyl)	1051.5	Medium	44.55	0.0329794			0
	VMLGETNPADSKPGTIR	2	4	4	1421609;37928159;116667867;311772088		1785.92	Low	25.85	4.12437			0
	TFIAIKPDGVQR	1	4	4	1421609;37928159;116667867;311772088		1344.76	Low	18.42	17.049			0
37928159	Chain A, X-Ray Structure Of Human Nucleoside Diphosphate Kinase A Complexed With Adp At 2 A Resolution	25	1	0	3	4	44.55	25	3	4					152	17.0966	5.90967
	Sequence	# PSMs	# Proteins	# Protein Groups	Protein Group Accessions	Modifications	MH+ [Da]	A2	IonScore A2	Exp Value A2	A4	XCorr A4	# Missed Cleavages
	GDFCIQVGR	1	4	4	1421609;37928159;116667867;311772088	C4(Carbamidomethyl)	1051.5	Medium	44.55	0.0329794			0
	VMLGETNPADSKPGTIR	2	4	4	1421609;37928159;116667867;311772088		1785.92	Low	25.85	4.12437			0
	TFIAIKPDGVQR	1	4	4	1421609;37928159;116667867;311772088		1344.76	Low	18.42	17.049			0
116667867	Chain A, S120g Mutant Of Human Nucleoside Diphosphate Kinase A Complexed With Adp	25	1	0	3	4	44.55	25	3	4					152	17.1077	6.18896
	Sequence	# PSMs	# Proteins	# Protein Groups	Protein Group Accessions	Modifications	MH+ [Da]	A2	IonScore A2	Exp Value A2	A4	XCorr A4	# Missed Cleavages
	GDFCIQVGR	1	4	4	1421609;37928159;116667867;311772088	C4(Carbamidomethyl)	1051.5	Medium	44.55	0.0329794			0
	VMLGETNPADSKPGTIR	2	4	4	1421609;37928159;116667867;311772088		1785.92	Low	25.85	4.12437			0
	TFIAIKPDGVQR	1	4	4	1421609;37928159;116667867;311772088		1344.76	Low	18.42	17.049			0
311772088	Chain A, Crystal Structure Of Human Nm23-H1	22.09	1	0	3	4	44.55	22.09	3	4					172	19.2997	7.10791
	Sequence	# PSMs	# Proteins	# Protein Groups	Protein Group Accessions	Modifications	MH+ [Da]	A2	IonScore A2	Exp Value A2	A4	XCorr A4	# Missed Cleavages
	GDFCIQVGR	1	4	4	1421609;37928159;116667867;311772088	C4(Carbamidomethyl)	1051.5	Medium	44.55	0.0329794			0
	VMLGETNPADSKPGTIR	2	4	4	1421609;37928159;116667867;311772088		1785.92	Low	25.85	4.12437			0
	TFIAIKPDGVQR	1	4	4	1421609;37928159;116667867;311772088		1344.76	Low	18.42	17.049			0
478813	nonhistone chromosomal protein HMG-1 - human	22.22	1	0	4	4	37.0209	22.22	4	4					216	24.9682	5.49072
	Sequence	# PSMs	# Proteins	# Protein Groups	Protein Group Accessions	Modifications	MH+ [Da]	A2	IonScore A2	Exp Value A2	A4	XCorr A4	# Missed Cleavages
	KHPDASVNFSEFSK	1	2	2	478813;167744990		1592.77	Low	33.57	0.469233			1
	IKGEHPGLSIGDVAK	1	2	2	478813;167744990		1520.84	Low	33.37	0.575137			1
	YEKDIAAYR	1	2	2	478813;167744990		1128.57	Low	28.61	1.22468			1
	TYIPPKGETK	1	2	2	478813;167744990		1133.62	Low	14.94	57.801			1
167744990	Chain A, Solution Structure Of The Tandem Hmg Box Domain From Human High Mobility Group Protein B1	27.75	1	0	4	4	37.0209	27.75	4	4					173	19.617	9.71533
	Sequence	# PSMs	# Proteins	# Protein Groups	Protein Group Accessions	Modifications	MH+ [Da]	A2	IonScore A2	Exp Value A2	A4	XCorr A4	# Missed Cleavages
	KHPDASVNFSEFSK	1	2	2	478813;167744990		1592.77	Low	33.57	0.469233			1
	IKGEHPGLSIGDVAK	1	2	2	478813;167744990		1520.84	Low	33.37	0.575137			1
	YEKDIAAYR	1	2	2	478813;167744990		1128.57	Low	28.61	1.22468			1
	TYIPPKGETK	1	2	2	478813;167744990		1133.62	Low	14.94	57.801			1
1040689	Human Diff6,H5,CDC10 homologue [Homo sapiens]	6.9	1	0	2	2	36.47	6.9	2	2					406	46.5556	7.35693
	Sequence	# PSMs	# Proteins	# Protein Groups	Protein Group Accessions	Modifications	MH+ [Da]	A2	IonScore A2	Exp Value A2	A4	XCorr A4	# Missed Cleavages
	TIISYIDEQFER	1	3	3	4758158;Q15019;1040689;157836014		1513.75	Low	36.47	0.289185			0
	STLINSLFLTDLYPER	1	3	3	4758158;Q15019;1040689;157836014		1882	Low	23.08	6.98499			0
157836014	Chain A, Human Septin 2 In Complex With Gdp	9.3	1	0	2	2	36.47	9.3	2	2					301	34.5938	6.75635
	Sequence	# PSMs	# Proteins	# Protein Groups	Protein Group Accessions	Modifications	MH+ [Da]	A2	IonScore A2	Exp Value A2	A4	XCorr A4	# Missed Cleavages
	TIISYIDEQFER	1	3	3	4758158;Q15019;1040689;157836014		1513.75	Low	36.47	0.289185			0
	STLINSLFLTDLYPER	1	3	3	4758158;Q15019;1040689;157836014		1882	Low	23.08	6.98499			0
255311812	Chain A, Crystal Structure Of Human Rangdp	14.48	1	0	3	3	28.71	14.48	3	3					221	24.8568	7.51807
	Sequence	# PSMs	# Proteins	# Protein Groups	Protein Group Accessions	Modifications	MH+ [Da]	A2	IonScore A2	Exp Value A2	A4	XCorr A4	# Missed Cleavages
	FNVWDTAGQEK	1	2	2	255311812;255311816		1294.61	Low	31.46	0.525012			0
	NLQYYDISAK	1	2	2	255311812;255311816		1214.6	Low	28.71	1.31538			0
	LVLVGDGGTGK	1	2	2	255311812;255311816		1015.58	Low	27.28	2.41337			0
255311816	Chain A, Crystal Structure Of Human Rangdp-Nup153znf3 Complex	14.48	1	0	3	3	28.71	14.48	3	3					221	24.7968	7.51807
	Sequence	# PSMs	# Proteins	# Protein Groups	Protein Group Accessions	Modifications	MH+ [Da]	A2	IonScore A2	Exp Value A2	A4	XCorr A4	# Missed Cleavages
	FNVWDTAGQEK	1	2	2	255311812;255311816		1294.61	Low	31.46	0.525012			0
	NLQYYDISAK	1	2	2	255311812;255311816		1214.6	Low	28.71	1.31538			0
	LVLVGDGGTGK	1	2	2	255311812;255311816		1015.58	Low	27.28	2.41337			0
Q9UHB7	AF4/FMR2 family member 4 OS=Homo sapiens GN=AFF4 PE=1 SV=1 - [AFF4_HUMAN]	12.9	1	8	10	17		0			54.1104	12.9	10	17	1163	127.382	9.30518
	Sequence	# PSMs	# Proteins	# Protein Groups	Protein Group Accessions	Modifications	MH+ [Da]	A2	IonScore A2	Exp Value A2	A4	XCorr A4	# Missed Cleavages
	IPSQPLDASASGDVSCVDEILK	1	1	1	7656879;Q9UHB7	C16(Carbamidomethyl)	2301.13				High	4.86262	0
	LSSEHYSSQSHGNSMTELKPSSK	2	1	1	7656879;Q9UHB7		2521.16				High	3.85682	0
	LSSEHYSSQSHGNSMTELKPSSK	2	1	1	7656879;Q9UHB7	M15(Oxidation)	2537.16				High	3.67288	0
	LKIPSQPLDASASGDVSCVDEILK	1	1	1	7656879;Q9UHB7	C18(Carbamidomethyl)	2542.31				High	3.66735	1
	APSSSSNCPPSAPTLDSSKPR	1	1	1	7656879;Q9UHB7	C8(Carbamidomethyl)	2143.01				High	3.63401	0
	VPFSSGQHSTQSFPPSLMSK	2	1	1	7656879;Q9UHB7		2149.04				High	3.44593	0
	EKAPSSSSNCPPSAPTLDSSKPR	2	1	1	7656879;Q9UHB7	C10(Carbamidomethyl)	2400.14				Medium	3.10712	1
	SNSMLQKPTAYVRPMDGQESMEPK	1	1	1	7656879;Q9UHB7	M4(Oxidation); M15(Oxidation); M21(Oxidation)	2772.27				Low	2.88343	0
	SNSMLQKPTAYVRPMDGQESMEPK	1	1	1	7656879;Q9UHB7	M15(Oxidation); M21(Oxidation)	2756.27				Low	2.8177	0
	LVAIPKPTVPPSADEK	1	1	1	7656879;Q9UHB7		1661.95				High	2.76805	0
	DPDANWDSPSR	2	1	1	7656879;Q9UHB7		1259.53				High	2.69581	0
	SNPNFFEQR	1	1	1	7656879;Q9UHB7		1138.53				Low	2.05965	0
P06280	Alpha-galactosidase A OS=Homo sapiens GN=GLA PE=1 SV=1 - [AGAL_HUMAN]	23.08	1	0	4	219		0			369.086	20.51	3	108	429	48.7349	5.60498
	Sequence	# PSMs	# Proteins	# Protein Groups	Protein Group Accessions	Modifications	MH+ [Da]	A2	IonScore A2	Exp Value A2	A4	XCorr A4	# Missed Cleavages
	LFMEMAELMVSEGWK	210	4	4	4504009;P06280;47168708;269914455;295789486		1800.84	High	103.69	3.0032e-08	High	4.73087	0
	QGDNFEVWERPLSGLAWAVAMINR	4	4	4	4504009;P06280;47168708;269914455;295789486		2759.37	Medium	54.98	0.00442888	High	5.99665	0
	TPTMGWLHWER	1	4	4	47168708;269914455;295789486;4504009;P06280		1413.67	Low	29.88	0.871706			0
	IVDVAGPGGWNDPDMLVIGNFGLSWNQQVTQMALWAIMAAPLFMSNDLR	4	4	4	4504009;P06280;47168708;269914455;295789486		5359.62	Low	24.94	1.66165	Medium	3.23942	0
P04075	Fructose-bisphosphate aldolase A OS=Homo sapiens GN=ALDOA PE=1 SV=2 - [ALDOA_HUMAN]	21.98	1	0	7	17		0			15.4003	12.36	3	5	364	39.3953	8.08936
	Sequence	# PSMs	# Proteins	# Protein Groups	Protein Group Accessions	Modifications	MH+ [Da]	A2	IonScore A2	Exp Value A2	A4	XCorr A4	# Missed Cleavages
	GILAADESTGSIAK	4	2	2	4557976;4557305;P04075		1332.7	High	80.12	1.71233e-05	High	3.53785	0
	IGEHTPSALAIMENANVLAR	5	2	2	4557305;P04075;4557976		2107.1	High	56.24	0.00357952	High	3.70385	0
	ALANSLACQGK	3	2	2	4557976;4557305;P04075	C8(Carbamidomethyl)	1132.58	Medium	50.09	0.0165651	Low	2.14022	0
	QLLLTADDR	1	2	2	4557976;4557305;P04075		1044.57	Low	28.42	2.16762			0
	ADDGRPFPQVIK	2	2	2	4557976;4557305;P04075		1342.71	Low	25.45	3.74709			0
	PYQYPALTPEQKK	1	1	1	4557976		1562.82	Low	24	6.3725			1
	GILAADESTGSIAKR	1	2	2	4557976;4557305;P04075		1488.8	Low	19.2	18.9705			1
P09972	Fructose-bisphosphate aldolase C OS=Homo sapiens GN=ALDOC PE=1 SV=2 - [ALDOC_HUMAN]	7.14	1	0	2	5		0			8.06063	7.14	2	2	364	39.4312	6.87354
	Sequence	# PSMs	# Proteins	# Protein Groups	Protein Group Accessions	Modifications	MH+ [Da]	A2	IonScore A2	Exp Value A2	A4	XCorr A4	# Missed Cleavages
	GVVPLAGTDGETTTQGLDGLSER	2	2	2	4885063;P09972;61680382		2273.13	High	102.83	7.30533e-08	High	3.23346	0
	VDKGVVPLAGTDGETTTQGLDGLSER	3	2	2	4885063;P09972;61680382		2615.32	Medium	46.57	0.0320878	High	4.82718	1
O95260	Arginyl-tRNA--protein transferase 1 OS=Homo sapiens GN=ATE1 PE=1 SV=2 - [ATE1_HUMAN]	4.83	1	2	2	3		0			7.76195	4.83	2	3	518	59.0522	7.92822
	Sequence	# PSMs	# Proteins	# Protein Groups	Protein Group Accessions	Modifications	MH+ [Da]	A2	IonScore A2	Exp Value A2	A4	XCorr A4	# Missed Cleavages
	NPPDTPTESQFTR	2	1	1	50345877;O95260		1489.69				High	2.81295	0
	FNQDPEAVDEDR	1	1	1	50345877;O95260		1434.61				Medium	2.3947	0
P06576	ATP synthase subunit beta, mitochondrial OS=Homo sapiens GN=ATP5B PE=1 SV=3 - [ATPB_HUMAN]	8.13	1	2	3	6		0			23.8092	8.13	3	6	529	56.5246	5.40186
	Sequence	# PSMs	# Proteins	# Protein Groups	Protein Group Accessions	Modifications	MH+ [Da]	A2	IonScore A2	Exp Value A2	A4	XCorr A4	# Missed Cleavages
	DQEGQDVLLFIDNIFR	3	1	1	32189394;P06576		1921.97				High	5.31493	0
	TVLIMELINNVAK	2	1	1	32189394;P06576		1457.84				High	3.58384	0
	FTQAGSEVSALLGR	1	1	1	32189394;P06576		1435.75				Medium	2.48965	0
P35520	Cystathionine beta-synthase OS=Homo sapiens GN=CBS PE=1 SV=2 - [CBS_HUMAN]	11.98	1	3	3	5		0			17.6607	11.98	3	5	551	60.5482	6.65381
	Sequence	# PSMs	# Proteins	# Protein Groups	Protein Group Accessions	Modifications	MH+ [Da]	A2	IonScore A2	Exp Value A2	A4	XCorr A4	# Missed Cleavages
	DGTLKPGDTIIEPTSGNTGIGLALAAAVR	1	1	1	4557415;P35520		2808.51				High	5.17387	0
	VQELGLSAPLTVLPTITCGHTIEILR	3	1	1	4557415;P35520	C18(Carbamidomethyl)	2831.57				High	3.6387	0
	SNDEEAFTFAR	1	1	1	4557415;P35520		1286.56				Low	2.22485	0
O60563	Cyclin-T1 OS=Homo sapiens GN=CCNT1 PE=1 SV=1 - [CCNT1_HUMAN]	8.54	1	3	3	3		0			10.8874	8.54	3	3	726	80.6345	8.77783
	Sequence	# PSMs	# Proteins	# Protein Groups	Protein Group Accessions	Modifications	MH+ [Da]	A2	IonScore A2	Exp Value A2	A4	XCorr A4	# Missed Cleavages
	RGPSEETGGAVFDHPAK	1	1	1	17978466;O60563		1754.84				High	3.95787	1
	TSENLALTGVDHSLPQDGSNAFISQK	1	1	1	17978466;O60563		2729.34				High	3.58992	0
	IKVHAAADKHNSVEDSVTK	1	1	1	17978466;O60563		2049.07				Medium	3.33962	2
P50750	Cyclin-dependent kinase 9 OS=Homo sapiens GN=CDK9 PE=1 SV=3 - [CDK9_HUMAN]	26.61	1	8	8	17		0			51.0749	26.61	8	17	372	42.7502	8.79248
	Sequence	# PSMs	# Proteins	# Protein Groups	Protein Group Accessions	Modifications	MH+ [Da]	A2	IonScore A2	Exp Value A2	A4	XCorr A4	# Missed Cleavages
	IDSDDALNHDFFWSDPMPSDLK	2	1	1	4502747;P50750		2565.13				High	3.89846	0
	HENVVNLIEICR	3	1	1	4502747;P50750	C11(Carbamidomethyl)	1495.77				High	3.62396	0
	NPATTNQTEFER	3	1	1	4502747;P50750		1407.65				High	3.48876	0
	DPYALDLIDK	2	1	1	4502747;P50750		1162.6				High	3.08483	0
	VVTLWYRPPELLLGER	1	1	1	4502747;P50750		1941.1				Medium	3.06316	0
	IGQGTFGEVFK	2	1	1	4502747;P50750		1182.62				High	2.66877	0
	LADFGLAR	2	1	1	4502747;P50750		862.479				Medium	2.57806	0
	AANVLITR	2	1	1	4502747;P50750		857.52				Medium	2.44709	0
P10809	60 kDa heat shock protein, mitochondrial OS=Homo sapiens GN=HSPD1 PE=1 SV=2 - [CH60_HUMAN]	16.93	1	6	6	25		0			100.76	16.93	6	25	573	61.0164	5.87158
	Sequence	# PSMs	# Proteins	# Protein Groups	Protein Group Accessions	Modifications	MH+ [Da]	A2	IonScore A2	Exp Value A2	A4	XCorr A4	# Missed Cleavages
	ALMLQGVDLLADAVAVTMGPK	10	1	1	31542947;P10809		2113.14				High	5.32243	0
	ALMLQGVDLLADAVAVTMGPK	6	1	1	31542947;P10809	M18(Oxidation)	2129.14				High	5.08032	0
	GVMLAVDAVIAELKK	1	1	1	31542947;P10809		1556.91				High	4.02529	1
	TALLDAAGVASLLTTAEVVVTEIPKEEK	3	1	1	31542947;P10809		2868.58				High	3.92418	1
	TVIIEQSWGSPK	2	1	1	31542947;P10809		1344.72				High	2.96287	0
	GYISPYFINTSK	1	1	1	31542947;P10809		1389.7				High	2.60858	0
	VGLQVVAVK	2	1	1	31542947;P10809		912.587				Medium	2.57507	0
P35659	Protein DEK OS=Homo sapiens GN=DEK PE=1 SV=1 - [DEK_HUMAN]	21.07	1	6	7	20		0			57.1003	21.07	7	20	375	42.6479	8.55811
	Sequence	# PSMs	# Proteins	# Protein Groups	Protein Group Accessions	Modifications	MH+ [Da]	A2	IonScore A2	Exp Value A2	A4	XCorr A4	# Missed Cleavages
	VYENYPTYDLTER	2	1	1	4503249;P35659		1662.77				High	3.79636	0
	LTMQVSSLQR	2	1	1	4503249;P35659		1162.62				High	3.33695	0
	LLASANLEEVTMK	2	1	1	4503249;P35659	M12(Oxidation)	1434.75				High	3.26464	0
	LLASANLEEVTMK	3	1	1	4503249;P35659		1418.76				High	3.24556	0
	KPPTDEELKETIKK	2	1	1	4503249;P35659		1655.92				Medium	2.98527	2
	NVGQFSGFPFEK	3	1	1	4503249;P35659		1356.66				High	2.81933	0
	LTMQVSSLQR	2	1	1	4503249;P35659	M3(Oxidation)	1178.62				High	2.7805	0
	SICEVLDLER	3	1	1	4503249;P35659	C3(Carbamidomethyl)	1233.61				High	2.65021	0
	IHFFLSK	1	1	1	4503249;P35659		891.51				Low	2.27511	0
Q5VTE0	Putative elongation factor 1-alpha-like 3 OS=Homo sapiens GN=EEF1A1P5 PE=5 SV=1 - [EF1A3_HUMAN]	27.06	1	7	8	25		0			91.0737	27.06	8	25	462	50.1532	9.0708
	Sequence	# PSMs	# Proteins	# Protein Groups	Protein Group Accessions	Modifications	MH+ [Da]	A2	IonScore A2	Exp Value A2	A4	XCorr A4	# Missed Cleavages
	NMITGTSQADCAVLIVAAGVGEFEAGISK	5	1	1	74746925;Q5VTE0	C11(Carbamidomethyl)	2909.44				High	6.15624	0
	NMITGTSQADCAVLIVAAGVGEFEAGISK	4	1	1	74746925;Q5VTE0	M2(Oxidation); C11(Carbamidomethyl)	2925.44				High	5.37583	0
	KDGNASGTTLLEALDCILPPTRPTDKPLR	3	1	1	74746925;Q5VTE0	C16(Carbamidomethyl)	3149.67				High	4.23895	1
	DGNASGTTLLEALDCILPPTRPTDKPLR	4	1	1	74746925;Q5VTE0	C15(Carbamidomethyl)	3021.56				High	4.07945	0
	VETGVLKPGMVVTFAPVNVTTEVK	1	1	1	74746925;Q5VTE0	M10(Oxidation)	2531.38				High	3.21798	0
	YYVTIIDAPGHR	2	1	1	74746925;Q5VTE0		1404.73				High	2.9384	0
	IGGIGTVPVGR	3	1	1	74746925;Q5VTE0		1025.61				High	2.72938	0
	EHALLAYTLGVK	2	1	1	74746925;Q5VTE0		1314.74				Low	2.28299	0
	LPLQDVYK	1	1	1	74746925;Q5VTE0		975.552				Low	2.03567	0
P24534	Elongation factor 1-beta OS=Homo sapiens GN=EEF1B2 PE=1 SV=3 - [EF1B_HUMAN]	12.44	1	2	2	4		0			13.8664	12.44	2	4	225	24.7483	4.66553
	Sequence	# PSMs	# Proteins	# Protein Groups	Protein Group Accessions	Modifications	MH+ [Da]	A2	IonScore A2	Exp Value A2	A4	XCorr A4	# Missed Cleavages
	SPAGLQVLNDYLADK	2	1	1	4503477;P24534		1603.83				High	4.4098	0
	SIQADGLVWGSSK	2	1	1	4503477;P24534		1347.69				High	3.04182	0
P29692	Elongation factor 1-delta OS=Homo sapiens GN=EEF1D PE=1 SV=5 - [EF1D_HUMAN]	17.08	1	0	3	12		0			14.0237	17.08	3	5	281	31.1028	5.0083
	Sequence	# PSMs	# Proteins	# Protein Groups	Protein Group Accessions	Modifications	MH+ [Da]	A2	IonScore A2	Exp Value A2	A4	XCorr A4	# Missed Cleavages
	IASLEVENQSLR	4	2	2	25453472;P29692;38522		1358.73	High	81.39	1.21488e-05	High	3.03812	0
	GVVQELQQAISK	4	2	2	38522;25453472;P29692		1299.73	High	75.96	3.66858e-05	Medium	2.58935	0
	SLAGSSGPGASSGTSGDHGELVVR	4	2	2	25453472;P29692;38522		2185.05	Medium	50.96	0.00852464	High	3.1902	0
P26641	Elongation factor 1-gamma OS=Homo sapiens GN=EEF1G PE=1 SV=3 - [EF1G_HUMAN]	16.02	1	6	6	10		0			27.7489	16.02	6	10	437	50.0871	6.66846
	Sequence	# PSMs	# Proteins	# Protein Groups	Protein Group Accessions	Modifications	MH+ [Da]	A2	IonScore A2	Exp Value A2	A4	XCorr A4	# Missed Cleavages
	KAAAPAPEEEMDECEQALAAEPK	1	1	1	4503481;P26641	C14(Carbamidomethyl)	2485.12				High	3.39934	1
	KLDPGSEETQTLVR	2	1	1	4503481;P26641		1572.82				High	3.13959	1
	ALIAAQYSGAQVR	2	1	1	4503481;P26641		1347.74				High	3.07492	0
	LDPGSEETQTLVR	1	1	1	4503481;P26641		1444.73				High	2.97657	0
	ILGLLDAYLK	2	1	1	4503481;P26641		1118.68				Medium	2.47755	0
	STFVLDEFKR	2	1	1	4503481;P26641		1241.65				Medium	2.33162	1
P06733	Alpha-enolase OS=Homo sapiens GN=ENO1 PE=1 SV=2 - [ENOA_HUMAN]	49.08	1	0	16	65		0			98.1269	39.17	12	27	434	47.1393	7.38623
	Sequence	# PSMs	# Proteins	# Protein Groups	Protein Group Accessions	Modifications	MH+ [Da]	A2	IonScore A2	Exp Value A2	A4	XCorr A4	# Missed Cleavages
	AAVPSGASTGIYEALELR	4	2	2	4503571;P06733;203282367		1804.95	High	119.53	1.90149e-09	High	4.13342	0
	SGETEDTFIADLVVGLCTGQIK	8	2	2	4503571;P06733;203282367	C17(Carbamidomethyl)	2353.16	High	117.31	2.68174e-09	High	4.45564	0
	VNQIGSVTESLQACK	4	2	2	4503571;P06733;203282367	C14(Carbamidomethyl)	1633.82	High	111.54	1.10514e-08	High	3.90377	0
	GNPTVEVDLFTSK	4	2	2	4503571;P06733;203282367		1406.72	High	96.1	4.01959e-07	High	2.97624	0
	SFIKDYPVVSIEDPFDQDDWGAWQK	6	2	2	4503571;P06733;203282367		2985.39	High	85.54	1.94724e-06	High	6.24698	1
	LAMQEFMILPVGAANFR	7	2	2	203282367;4503571;P06733		1907.99	High	77.11	3.38775e-05	High	5.07039	0
	DATNVGDEGGFAPNILENK	4	2	2	4503571;P06733;203282367		1960.93	High	68.59	0.000112712	High	4.66548	0
	DYPVVSIEDPFDQDDWGAWQK	2	2	2	4503571;P06733;203282367		2510.12	High	67.29	5.33691e-05	High	2.86183	0
	YISPDQLADLYK	6	2	2	4503571;P06733;203282367		1425.73	High	62.13	0.000931722	High	3.0843	0
	DATNVGDEGGFAPNILENKEGLELLK	3	2	2	203282367;4503571;P06733		2743.38	High	60.91	0.00115996			1
	IGAEVYHNLK	5	2	2	4503571;P06733;203282367		1143.62	Medium	50.89	0.0119611	High	3.13675	0
	LMIEMDGTENK	4	2	2	4503571;P06733;203282367		1280.59	Medium	47.68	0.00985092	Medium	2.45143	0
	SGKYDLDFK	2	2	2	203282367;4503571;P06733		1072.53	Medium	44.98	0.0248304			1
	AGYTDKVVIGMDVAASEFFR	1	2	2	203282367;4503571;P06733		2176.08	Medium	44.3	0.0528435			1
	SCNCLLLK	4	2	2	4503571;P06733;203282367	C2(Carbamidomethyl); C4(Carbamidomethyl)	1007.5	Low	30.01	1.18372	Medium	2.34677	0
	SGKYDLDFKSPDDPSR	1	2	2	203282367;4503571;P06733		1826.86	Low	10.68	65.1219			2
P35637	RNA-binding protein FUS OS=Homo sapiens GN=FUS PE=1 SV=1 - [FUS_HUMAN]	16.54	1	4	4	7		0			27.4744	16.54	4	7	526	53.3938	9.36377
	Sequence	# PSMs	# Proteins	# Protein Groups	Protein Group Accessions	Modifications	MH+ [Da]	A2	IonScore A2	Exp Value A2	A4	XCorr A4	# Missed Cleavages
	HDSEQDNSDNNTIFVQGLGENVTIESVADYFK	2	1	1	4826734;P35637		3585.63				High	6.29327	0
	APKPDGPGGGPGGSHMGGNYGDDR	2	1	1	4826734;P35637		2252.97				High	3.5131	0
	AAIDWFDGKEFSGNPIK	1	1	1	4826734;P35637		1894.93				High	3.40725	1
	APKPDGPGGGPGGSHMGGNYGDDR	1	1	1	4826734;P35637	M16(Oxidation)	2268.97				Low	2.8611	0
	GEATVSFDDPPSAK	1	1	1	4826734;P35637		1420.66				High	2.67984	0
P04406	Glyceraldehyde-3-phosphate dehydrogenase OS=Homo sapiens GN=GAPDH PE=1 SV=3 - [G3P_HUMAN]	37.01	1	0	8	41		0			77.7552	34.93	7	20	335	36.0304	8.45557
	Sequence	# PSMs	# Proteins	# Protein Groups	Protein Group Accessions	Modifications	MH+ [Da]	A2	IonScore A2	Exp Value A2	A4	XCorr A4	# Missed Cleavages
	WGDAGAEYVVESTGVFTTMEK	2	2	2	7669492;P04406;67464043		2277.04	High	117.04	9.58534e-10	High	5.21112	0
	IISNASCTTNCLAPLAK	4	2	2	7669492;P04406;67464043	C7(Carbamidomethyl); C11(Carbamidomethyl)	1833.92	High	99.5	1.91057e-07	High	4.35874	0
	VPTANVSVVDLTCR	4	2	2	7669492;P04406;67464043	C13(Carbamidomethyl)	1530.8	High	80.57	1.46275e-05	High	3.25326	0
	VIHDNFGIVEGLMTTVHAITATQK	14	2	2	7669492;P04406;67464043		2595.36	High	74.42	4.72525e-05	High	6.74382	0
	LISWYDNEFGYSNR	4	2	2	67464043;7669492;P04406		1763.8	High	72.47	2.72191e-05	High	3.8196	0
	VVDLMAHMASKE	4	2	2	7669492;P04406;67464043		1330.65	High	66.25	0.000256713	High	2.82978	1
	GALQNIIPASTGAAK	8	2	2	7669492;P04406;67464043		1411.79	High	64.52	0.000357439	High	3.12186	0
	LTGMAFR	1	2	2	67464043;7669492;P04406		795.419	Low	27.08	1.85914			0
P38646	Stress-70 protein, mitochondrial OS=Homo sapiens GN=HSPA9 PE=1 SV=2 - [GRP75_HUMAN]	17.82	1	9	9	13		0			35.9508	17.82	9	13	679	73.6348	6.16357
	Sequence	# PSMs	# Proteins	# Protein Groups	Protein Group Accessions	Modifications	MH+ [Da]	A2	IonScore A2	Exp Value A2	A4	XCorr A4	# Missed Cleavages
	MKETAENYLGHTAK	1	1	1	24234688;P38646		1592.77				High	4.0911	1
	AQFEGIVTDLIR	2	1	1	24234688;P38646		1361.74				High	3.295	0
	DAGQISGLNVLR	1	1	1	24234688;P38646		1242.68				High	3.1139	0
	VQQTVQDLFGR	2	1	1	24234688;P38646		1290.68				High	3.01766	0
	NAVITVPAYFNDSQR	1	1	1	24234688;P38646		1694.85				Medium	2.5802	0
	LYSPSQIGAFVLMK	2	1	1	24234688;P38646		1553.84				Medium	2.56287	0
	LLGQFTLIGIPPAPR	1	1	1	24234688;P38646		1592.95				Medium	2.49551	0
	QAVTNPNNTFYATK	1	1	1	24234688;P38646		1568.77				Medium	2.37845	0
	TTPSVVAFTADGER	2	1	1	24234688;P38646		1450.72				Low	2.32397	0
P11021	78 kDa glucose-regulated protein OS=Homo sapiens GN=HSPA5 PE=1 SV=2 - [GRP78_HUMAN]	23.7	1	9	11	25		0			74.7116	23.7	11	25	654	72.2884	5.16064
	Sequence	# PSMs	# Proteins	# Protein Groups	Protein Group Accessions	Modifications	MH+ [Da]	A2	IonScore A2	Exp Value A2	A4	XCorr A4	# Missed Cleavages
	IINEPTAAAIAYGLDK	2	1	1	16507237;P11021		1659.9				High	4.27206	0
	LYGSAGPPPTGEEDTAEKDEL	2	1	1	16507237;P11021		2176				High	4.00248	1
	MKETAEAYLGKK	1	1	1	16507237;P11021		1368.72				High	3.87442	2
	VTHAVVTVPAYFNDAQR	2	1	1	16507237;P11021		1887.97				High	3.35081	0
	ITPSYVAFTPEGER	2	1	1	16507237;P11021		1566.78				High	3.19684	0
	TFAPEEISAMVLTK	2	1	1	16507237;P11021		1536.8				High	3.06723	0
	VEIIANDQGNR	6	2	2	16507237;P11021;167466173;P08107		1228.63				High	3.02372	0
	TWNDPSVQQDIK	2	1	1	16507237;P11021		1430.69				High	2.70404	0
	NQLTSNPENTVFDAK	2	1	1	16507237;P11021		1677.81				High	2.67918	0
	DAGTIAGLNVMR	2	1	1	16507237;P11021		1217.63				Medium	2.5487	0
	NELESYAYSLK	2	1	1	16507237;P11021		1316.64				Low	2.30068	0
P16403	Histone H1.2 OS=Homo sapiens GN=HIST1H1C PE=1 SV=2 - [H12_HUMAN]	15.96	1	0	3	5		0			12.3422	15.96	3	5	213	21.3517	10.9312
	Sequence	# PSMs	# Proteins	# Protein Groups	Protein Group Accessions	Modifications	MH+ [Da]	A2	IonScore A2	Exp Value A2	A4	XCorr A4	# Missed Cleavages
	KASGPPVSELITK	2	3	3	4885375;P16403;4885377;P16402;4885379;P10412		1326.76				High	2.87544	1
	SGVSLAALKK	1	3	3	4885375;P16403;4885377;P16402;4885379;P10412		973.604				Medium	2.47271	1
	ALAAAGYDVEK	2	3	3	4885375;P16403;4885377;P16402;4885379;P10412		1107.57				Medium	2.43945	0
P16402	Histone H1.3 OS=Homo sapiens GN=HIST1H1D PE=1 SV=2 - [H13_HUMAN]	15.38	1	0	3	5		0			12.3422	15.38	3	5	221	22.3363	11.019
	Sequence	# PSMs	# Proteins	# Protein Groups	Protein Group Accessions	Modifications	MH+ [Da]	A2	IonScore A2	Exp Value A2	A4	XCorr A4	# Missed Cleavages
	KASGPPVSELITK	2	3	3	4885375;P16403;4885377;P16402;4885379;P10412		1326.76				High	2.87544	1
	SGVSLAALKK	1	3	3	4885375;P16403;4885377;P16402;4885379;P10412		973.604				Medium	2.47271	1
	ALAAAGYDVEK	2	3	3	4885375;P16403;4885377;P16402;4885379;P10412		1107.57				Medium	2.43945	0
P10412	Histone H1.4 OS=Homo sapiens GN=HIST1H1E PE=1 SV=2 - [H14_HUMAN]	15.53	1	0	3	5		0			12.3422	15.53	3	5	219	21.852	11.0337
	Sequence	# PSMs	# Proteins	# Protein Groups	Protein Group Accessions	Modifications	MH+ [Da]	A2	IonScore A2	Exp Value A2	A4	XCorr A4	# Missed Cleavages
	KASGPPVSELITK	2	3	3	4885375;P16403;4885377;P16402;4885379;P10412		1326.76				High	2.87544	1
	SGVSLAALKK	1	3	3	4885375;P16403;4885377;P16402;4885379;P10412		973.604				Medium	2.47271	1
	ALAAAGYDVEK	2	3	3	4885375;P16403;4885377;P16402;4885379;P10412		1107.57				Medium	2.43945	0
P20671	Histone H2A type 1-D OS=Homo sapiens GN=HIST1H2AD PE=1 SV=2 - [H2A1D_HUMAN]	35.38	1	0	4	57		0			191.537	35.38	4	57	130	14.0989	10.9019
	Sequence	# PSMs	# Proteins	# Protein Groups	Protein Group Accessions	Modifications	MH+ [Da]	A2	IonScore A2	Exp Value A2	A4	XCorr A4	# Missed Cleavages
	VTIAQGGVLPNIQAVLLPK	46	4	4	10800130;P20671;18105045;Q96KK5;10800144;Q99878;4504251;Q6FI13		1931.17				High	4.82202	0
	NDEELNKLLGK	2	4	4	10800130;P20671;18105045;Q96KK5;10800144;Q99878;4504251;Q6FI13		1272.68				High	3.31588	1
	HLQLAIRNDEELNKLLGK	1	4	4	10800130;P20671;18105045;Q96KK5;10800144;Q99878;4504251;Q6FI13		2104.19				Medium	3.02776	2
	AGLQFPVGR	8	4	4	10800130;P20671;18105045;Q96KK5;10800144;Q99878;4504251;Q6FI13		944.531				Medium	2.50652	0
Q96KK5	Histone H2A type 1-H OS=Homo sapiens GN=HIST1H2AH PE=1 SV=3 - [H2A1H_HUMAN]	35.94	1	0	4	57		0			191.537	35.94	4	57	128	13.8978	10.8872
	Sequence	# PSMs	# Proteins	# Protein Groups	Protein Group Accessions	Modifications	MH+ [Da]	A2	IonScore A2	Exp Value A2	A4	XCorr A4	# Missed Cleavages
	VTIAQGGVLPNIQAVLLPK	46	4	4	10800130;P20671;18105045;Q96KK5;10800144;Q99878;4504251;Q6FI13		1931.17				High	4.82202	0
	NDEELNKLLGK	2	4	4	10800130;P20671;18105045;Q96KK5;10800144;Q99878;4504251;Q6FI13		1272.68				High	3.31588	1
	HLQLAIRNDEELNKLLGK	1	4	4	10800130;P20671;18105045;Q96KK5;10800144;Q99878;4504251;Q6FI13		2104.19				Medium	3.02776	2
	AGLQFPVGR	8	4	4	10800130;P20671;18105045;Q96KK5;10800144;Q99878;4504251;Q6FI13		944.531				Medium	2.50652	0
Q99878	Histone H2A type 1-J OS=Homo sapiens GN=HIST1H2AJ PE=1 SV=3 - [H2A1J_HUMAN]	35.94	1	0	4	57		0			191.537	35.94	4	57	128	13.9278	10.8872
	Sequence	# PSMs	# Proteins	# Protein Groups	Protein Group Accessions	Modifications	MH+ [Da]	A2	IonScore A2	Exp Value A2	A4	XCorr A4	# Missed Cleavages
	VTIAQGGVLPNIQAVLLPK	46	4	4	10800130;P20671;18105045;Q96KK5;10800144;Q99878;4504251;Q6FI13		1931.17				High	4.82202	0
	NDEELNKLLGK	2	4	4	10800130;P20671;18105045;Q96KK5;10800144;Q99878;4504251;Q6FI13		1272.68				High	3.31588	1
	HLQLAIRNDEELNKLLGK	1	4	4	10800130;P20671;18105045;Q96KK5;10800144;Q99878;4504251;Q6FI13		2104.19				Medium	3.02776	2
	AGLQFPVGR	8	4	4	10800130;P20671;18105045;Q96KK5;10800144;Q99878;4504251;Q6FI13		944.531				Medium	2.50652	0
Q6FI13	Histone H2A type 2-A OS=Homo sapiens GN=HIST2H2AA3 PE=1 SV=3 - [H2A2A_HUMAN]	35.38	1	0	4	57		0			191.537	35.38	4	57	130	14.0869	10.9019
	Sequence	# PSMs	# Proteins	# Protein Groups	Protein Group Accessions	Modifications	MH+ [Da]	A2	IonScore A2	Exp Value A2	A4	XCorr A4	# Missed Cleavages
	VTIAQGGVLPNIQAVLLPK	46	4	4	10800130;P20671;18105045;Q96KK5;10800144;Q99878;4504251;Q6FI13		1931.17				High	4.82202	0
	NDEELNKLLGK	2	4	4	10800130;P20671;18105045;Q96KK5;10800144;Q99878;4504251;Q6FI13		1272.68				High	3.31588	1
	HLQLAIRNDEELNKLLGK	1	4	4	10800130;P20671;18105045;Q96KK5;10800144;Q99878;4504251;Q6FI13		2104.19				Medium	3.02776	2
	AGLQFPVGR	8	4	4	10800130;P20671;18105045;Q96KK5;10800144;Q99878;4504251;Q6FI13		944.531				Medium	2.50652	0
P62807	Histone H2B type 1-C/E/F/G/I OS=Homo sapiens GN=HIST1H2BC PE=1 SV=4 - [H2B1C_HUMAN]	26.98	1	0	3	47		0			188.042	26.98	3	47	126	13.8976	10.3159
	Sequence	# PSMs	# Proteins	# Protein Groups	Protein Group Accessions	Modifications	MH+ [Da]	A2	IonScore A2	Exp Value A2	A4	XCorr A4	# Missed Cleavages
	AMGIMNSFVNDIFER	32	8	8	4504257;P62807;10800138;P58876;4504269;Q93079;18105048;O60814;4504259;Q99880;4504263;Q99879;4504261;Q99877;9973351;P57053		1743.82				High	4.91838	0
	AMGIMNSFVNDIFER	6	8	8	4504257;P62807;10800138;P58876;4504269;Q93079;18105048;O60814;4504259;Q99880;4504263;Q99879;4504261;Q99877;9973351;P57053	M2(Oxidation)	1759.82				High	4.57464	0
	AMGIMNSFVNDIFER	5	8	8	4504257;P62807;10800138;P58876;4504269;Q93079;18105048;O60814;4504259;Q99880;4504263;Q99879;4504261;Q99877;9973351;P57053	M2(Oxidation); M5(Oxidation)	1775.81				High	4.41491	0
	KESYSVYVYK	3	8	8	4504257;P62807;10800138;P58876;4504269;Q93079;18105048;O60814;4504259;Q99880;4504263;Q99879;4504261;Q99877;9973351;P57053		1265.64				High	2.9665	1
	LLLPGELAK	1	8	8	4504257;P62807;10800138;P58876;4504269;Q93079;18105048;O60814;4504259;Q99880;4504263;Q99879;4504261;Q99877;9973351;P57053		953.602				Low	2.0575	0
P58876	Histone H2B type 1-D OS=Homo sapiens GN=HIST1H2BD PE=1 SV=2 - [H2B1D_HUMAN]	26.98	1	0	3	47		0			188.042	26.98	3	47	126	13.9276	10.3159
	Sequence	# PSMs	# Proteins	# Protein Groups	Protein Group Accessions	Modifications	MH+ [Da]	A2	IonScore A2	Exp Value A2	A4	XCorr A4	# Missed Cleavages
	AMGIMNSFVNDIFER	32	8	8	4504257;P62807;10800138;P58876;4504269;Q93079;18105048;O60814;4504259;Q99880;4504263;Q99879;4504261;Q99877;9973351;P57053		1743.82				High	4.91838	0
	AMGIMNSFVNDIFER	6	8	8	4504257;P62807;10800138;P58876;4504269;Q93079;18105048;O60814;4504259;Q99880;4504263;Q99879;4504261;Q99877;9973351;P57053	M2(Oxidation)	1759.82				High	4.57464	0
	AMGIMNSFVNDIFER	5	8	8	4504257;P62807;10800138;P58876;4504269;Q93079;18105048;O60814;4504259;Q99880;4504263;Q99879;4504261;Q99877;9973351;P57053	M2(Oxidation); M5(Oxidation)	1775.81				High	4.41491	0
	KESYSVYVYK	3	8	8	4504257;P62807;10800138;P58876;4504269;Q93079;18105048;O60814;4504259;Q99880;4504263;Q99879;4504261;Q99877;9973351;P57053		1265.64				High	2.9665	1
	LLLPGELAK	1	8	8	4504257;P62807;10800138;P58876;4504269;Q93079;18105048;O60814;4504259;Q99880;4504263;Q99879;4504261;Q99877;9973351;P57053		953.602				Low	2.0575	0
Q93079	Histone H2B type 1-H OS=Homo sapiens GN=HIST1H2BH PE=1 SV=3 - [H2B1H_HUMAN]	26.98	1	0	3	47		0			188.042	26.98	3	47	126	13.8835	10.3159
	Sequence	# PSMs	# Proteins	# Protein Groups	Protein Group Accessions	Modifications	MH+ [Da]	A2	IonScore A2	Exp Value A2	A4	XCorr A4	# Missed Cleavages
	AMGIMNSFVNDIFER	32	8	8	4504257;P62807;10800138;P58876;4504269;Q93079;18105048;O60814;4504259;Q99880;4504263;Q99879;4504261;Q99877;9973351;P57053		1743.82				High	4.91838	0
	AMGIMNSFVNDIFER	6	8	8	4504257;P62807;10800138;P58876;4504269;Q93079;18105048;O60814;4504259;Q99880;4504263;Q99879;4504261;Q99877;9973351;P57053	M2(Oxidation)	1759.82				High	4.57464	0
	AMGIMNSFVNDIFER	5	8	8	4504257;P62807;10800138;P58876;4504269;Q93079;18105048;O60814;4504259;Q99880;4504263;Q99879;4504261;Q99877;9973351;P57053	M2(Oxidation); M5(Oxidation)	1775.81				High	4.41491	0
	KESYSVYVYK	3	8	8	4504257;P62807;10800138;P58876;4504269;Q93079;18105048;O60814;4504259;Q99880;4504263;Q99879;4504261;Q99877;9973351;P57053		1265.64				High	2.9665	1
	LLLPGELAK	1	8	8	4504257;P62807;10800138;P58876;4504269;Q93079;18105048;O60814;4504259;Q99880;4504263;Q99879;4504261;Q99877;9973351;P57053		953.602				Low	2.0575	0
O60814	Histone H2B type 1-K OS=Homo sapiens GN=HIST1H2BK PE=1 SV=3 - [H2B1K_HUMAN]	26.98	1	0	3	47		0			188.042	26.98	3	47	126	13.8816	10.3159
	Sequence	# PSMs	# Proteins	# Protein Groups	Protein Group Accessions	Modifications	MH+ [Da]	A2	IonScore A2	Exp Value A2	A4	XCorr A4	# Missed Cleavages
	AMGIMNSFVNDIFER	32	8	8	4504257;P62807;10800138;P58876;4504269;Q93079;18105048;O60814;4504259;Q99880;4504263;Q99879;4504261;Q99877;9973351;P57053		1743.82				High	4.91838	0
	AMGIMNSFVNDIFER	6	8	8	4504257;P62807;10800138;P58876;4504269;Q93079;18105048;O60814;4504259;Q99880;4504263;Q99879;4504261;Q99877;9973351;P57053	M2(Oxidation)	1759.82				High	4.57464	0
	AMGIMNSFVNDIFER	5	8	8	4504257;P62807;10800138;P58876;4504269;Q93079;18105048;O60814;4504259;Q99880;4504263;Q99879;4504261;Q99877;9973351;P57053	M2(Oxidation); M5(Oxidation)	1775.81				High	4.41491	0
	KESYSVYVYK	3	8	8	4504257;P62807;10800138;P58876;4504269;Q93079;18105048;O60814;4504259;Q99880;4504263;Q99879;4504261;Q99877;9973351;P57053		1265.64				High	2.9665	1
	LLLPGELAK	1	8	8	4504257;P62807;10800138;P58876;4504269;Q93079;18105048;O60814;4504259;Q99880;4504263;Q99879;4504261;Q99877;9973351;P57053		953.602				Low	2.0575	0
Q99880	Histone H2B type 1-L OS=Homo sapiens GN=HIST1H2BL PE=1 SV=3 - [H2B1L_HUMAN]	26.98	1	0	3	47		0			188.042	26.98	3	47	126	13.9436	10.3159
	Sequence	# PSMs	# Proteins	# Protein Groups	Protein Group Accessions	Modifications	MH+ [Da]	A2	IonScore A2	Exp Value A2	A4	XCorr A4	# Missed Cleavages
	AMGIMNSFVNDIFER	32	8	8	4504257;P62807;10800138;P58876;4504269;Q93079;18105048;O60814;4504259;Q99880;4504263;Q99879;4504261;Q99877;9973351;P57053		1743.82				High	4.91838	0
	AMGIMNSFVNDIFER	6	8	8	4504257;P62807;10800138;P58876;4504269;Q93079;18105048;O60814;4504259;Q99880;4504263;Q99879;4504261;Q99877;9973351;P57053	M2(Oxidation)	1759.82				High	4.57464	0
	AMGIMNSFVNDIFER	5	8	8	4504257;P62807;10800138;P58876;4504269;Q93079;18105048;O60814;4504259;Q99880;4504263;Q99879;4504261;Q99877;9973351;P57053	M2(Oxidation); M5(Oxidation)	1775.81				High	4.41491	0
	KESYSVYVYK	3	8	8	4504257;P62807;10800138;P58876;4504269;Q93079;18105048;O60814;4504259;Q99880;4504263;Q99879;4504261;Q99877;9973351;P57053		1265.64				High	2.9665	1
	LLLPGELAK	1	8	8	4504257;P62807;10800138;P58876;4504269;Q93079;18105048;O60814;4504259;Q99880;4504263;Q99879;4504261;Q99877;9973351;P57053		953.602				Low	2.0575	0
Q99879	Histone H2B type 1-M OS=Homo sapiens GN=HIST1H2BM PE=1 SV=3 - [H2B1M_HUMAN]	26.98	1	0	3	47		0			188.042	26.98	3	47	126	13.9806	10.3159
	Sequence	# PSMs	# Proteins	# Protein Groups	Protein Group Accessions	Modifications	MH+ [Da]	A2	IonScore A2	Exp Value A2	A4	XCorr A4	# Missed Cleavages
	AMGIMNSFVNDIFER	32	8	8	4504257;P62807;10800138;P58876;4504269;Q93079;18105048;O60814;4504259;Q99880;4504263;Q99879;4504261;Q99877;9973351;P57053		1743.82				High	4.91838	0
	AMGIMNSFVNDIFER	6	8	8	4504257;P62807;10800138;P58876;4504269;Q93079;18105048;O60814;4504259;Q99880;4504263;Q99879;4504261;Q99877;9973351;P57053	M2(Oxidation)	1759.82				High	4.57464	0
	AMGIMNSFVNDIFER	5	8	8	4504257;P62807;10800138;P58876;4504269;Q93079;18105048;O60814;4504259;Q99880;4504263;Q99879;4504261;Q99877;9973351;P57053	M2(Oxidation); M5(Oxidation)	1775.81				High	4.41491	0
	KESYSVYVYK	3	8	8	4504257;P62807;10800138;P58876;4504269;Q93079;18105048;O60814;4504259;Q99880;4504263;Q99879;4504261;Q99877;9973351;P57053		1265.64				High	2.9665	1
	LLLPGELAK	1	8	8	4504257;P62807;10800138;P58876;4504269;Q93079;18105048;O60814;4504259;Q99880;4504263;Q99879;4504261;Q99877;9973351;P57053		953.602				Low	2.0575	0
Q99877	Histone H2B type 1-N OS=Homo sapiens GN=HIST1H2BN PE=1 SV=3 - [H2B1N_HUMAN]	26.98	1	0	3	47		0			188.042	26.98	3	47	126	13.9136	10.3159
	Sequence	# PSMs	# Proteins	# Protein Groups	Protein Group Accessions	Modifications	MH+ [Da]	A2	IonScore A2	Exp Value A2	A4	XCorr A4	# Missed Cleavages
	AMGIMNSFVNDIFER	32	8	8	4504257;P62807;10800138;P58876;4504269;Q93079;18105048;O60814;4504259;Q99880;4504263;Q99879;4504261;Q99877;9973351;P57053		1743.82				High	4.91838	0
	AMGIMNSFVNDIFER	6	8	8	4504257;P62807;10800138;P58876;4504269;Q93079;18105048;O60814;4504259;Q99880;4504263;Q99879;4504261;Q99877;9973351;P57053	M2(Oxidation)	1759.82				High	4.57464	0
	AMGIMNSFVNDIFER	5	8	8	4504257;P62807;10800138;P58876;4504269;Q93079;18105048;O60814;4504259;Q99880;4504263;Q99879;4504261;Q99877;9973351;P57053	M2(Oxidation); M5(Oxidation)	1775.81				High	4.41491	0
	KESYSVYVYK	3	8	8	4504257;P62807;10800138;P58876;4504269;Q93079;18105048;O60814;4504259;Q99880;4504263;Q99879;4504261;Q99877;9973351;P57053		1265.64				High	2.9665	1
	LLLPGELAK	1	8	8	4504257;P62807;10800138;P58876;4504269;Q93079;18105048;O60814;4504259;Q99880;4504263;Q99879;4504261;Q99877;9973351;P57053		953.602				Low	2.0575	0
P57053	Histone H2B type F-S OS=Homo sapiens GN=H2BFS PE=1 SV=2 - [H2BFS_HUMAN]	26.98	1	0	3	47		0			188.042	26.98	3	47	126	13.9356	10.3745
	Sequence	# PSMs	# Proteins	# Protein Groups	Protein Group Accessions	Modifications	MH+ [Da]	A2	IonScore A2	Exp Value A2	A4	XCorr A4	# Missed Cleavages
	AMGIMNSFVNDIFER	32	8	8	4504257;P62807;10800138;P58876;4504269;Q93079;18105048;O60814;4504259;Q99880;4504263;Q99879;4504261;Q99877;9973351;P57053		1743.82				High	4.91838	0
	AMGIMNSFVNDIFER	6	8	8	4504257;P62807;10800138;P58876;4504269;Q93079;18105048;O60814;4504259;Q99880;4504263;Q99879;4504261;Q99877;9973351;P57053	M2(Oxidation)	1759.82				High	4.57464	0
	AMGIMNSFVNDIFER	5	8	8	4504257;P62807;10800138;P58876;4504269;Q93079;18105048;O60814;4504259;Q99880;4504263;Q99879;4504261;Q99877;9973351;P57053	M2(Oxidation); M5(Oxidation)	1775.81				High	4.41491	0
	KESYSVYVYK	3	8	8	4504257;P62807;10800138;P58876;4504269;Q93079;18105048;O60814;4504259;Q99880;4504263;Q99879;4504261;Q99877;9973351;P57053		1265.64				High	2.9665	1
	LLLPGELAK	1	8	8	4504257;P62807;10800138;P58876;4504269;Q93079;18105048;O60814;4504259;Q99880;4504263;Q99879;4504261;Q99877;9973351;P57053		953.602				Low	2.0575	0
Q16695	Histone H3.1t OS=Homo sapiens GN=HIST3H3 PE=1 SV=3 - [H31T_HUMAN]	19.85	1	1	3	5		0			11.8491	19.85	3	5	136	15.4985	11.1216
	Sequence	# PSMs	# Proteins	# Protein Groups	Protein Group Accessions	Modifications	MH+ [Da]	A2	IonScore A2	Exp Value A2	A4	XCorr A4	# Missed Cleavages
	EIAQDFKTDLR	2	1	1	4504299;Q16695		1335.69				High	2.8165	1
	YRPGTVALR	2	1	1	4504299;Q16695		1032.59				Low	2.24921	0
	STELLIR	1	1	1	4504299;Q16695		831.494				Low	2.13652	0
P31943	Heterogeneous nuclear ribonucleoprotein H OS=Homo sapiens GN=HNRNPH1 PE=1 SV=4 - [HNRH1_HUMAN]	10.47	1	3	3	5		0			17.8944	10.47	3	5	449	49.1984	6.30322
	Sequence	# PSMs	# Proteins	# Protein Groups	Protein Group Accessions	Modifications	MH+ [Da]	A2	IonScore A2	Exp Value A2	A4	XCorr A4	# Missed Cleavages
	STGEAFVQFASQEIAEK	2	1	1	5031753;P31943		1841.89				High	4.20213	0
	ATENDIYNFFSPLNPVR	2	1	1	5031753;P31943		1996.98				High	3.94355	0
	GLPWSCSADEVQR	1	1	1	5031753;P31943	C6(Carbamidomethyl)	1504.68				Medium	2.43098	0
P07910	Heterogeneous nuclear ribonucleoproteins C1/C2 OS=Homo sapiens GN=HNRNPC PE=1 SV=4 - [HNRPC_HUMAN]	12.75	1	3	3	6		0			19.351	12.75	3	6	306	33.6495	5.08447
	Sequence	# PSMs	# Proteins	# Protein Groups	Protein Group Accessions	Modifications	MH+ [Da]	A2	IonScore A2	Exp Value A2	A4	XCorr A4	# Missed Cleavages
	MIAGQVLDINLAAEPK	2	1	1	117189975;P07910		1682.92				High	4.56796	0
	GFAFVQYVNER	2	1	1	117189975;P07910		1329.66				High	2.79295	0
	VFIGNLNTLVVK	2	1	1	117189975;P07910		1316.79				High	2.60627	0
P38159	RNA-binding motif protein, X chromosome OS=Homo sapiens GN=RBMX PE=1 SV=3 - [RBMX_HUMAN]	9.97	1	0	3	8		0			9.59429	9.97	3	4	391	42.3063	10.0522
	Sequence	# PSMs	# Proteins	# Protein Groups	Protein Group Accessions	Modifications	MH+ [Da]	A2	IonScore A2	Exp Value A2	A4	XCorr A4	# Missed Cleavages
	LFIGGLNTETNEK	4	2	2	542850;56699409;P38159		1435.75	High	59.82	0.00180191	Medium	2.46145	0
	DSYESYGNSR	2	2	2	542850;56699409;P38159		1177.48	Medium	36.83	0.0184149	Low	2.22572	0
	AIKVEQATKPSFESGR	2	2	2	56699409;P38159;542850		1747.93	Low	24.33	5.55201	Low	2.52961	1
P61978	Heterogeneous nuclear ribonucleoprotein K OS=Homo sapiens GN=HNRNPK PE=1 SV=1 - [HNRPK_HUMAN]	12.31	1	3	4	6		0			19.6626	12.31	4	6	463	50.9444	5.5415
	Sequence	# PSMs	# Proteins	# Protein Groups	Protein Group Accessions	Modifications	MH+ [Da]	A2	IonScore A2	Exp Value A2	A4	XCorr A4	# Missed Cleavages
	TDYNASVSVPDSSGPER	2	1	1	13384620;P61978		1780.8				High	3.88581	0
	GSYGDLGGPIITTQVTIPK	1	1	1	13384620;P61978		1917.03				High	3.79527	0
	IILDLISESPIK	2	1	1	13384620;P61978		1340.8				High	3.25789	0
	GSDFDCELR	1	1	1	13384620;P61978	C6(Carbamidomethyl)	1098.45				Low	2.31483	0
P07900	Heat shock protein HSP 90-alpha OS=Homo sapiens GN=HSP90AA1 PE=1 SV=5 - [HS90A_HUMAN]	7.65	1	3	5	8		0			21.512	7.65	5	8	732	84.6067	5.021
	Sequence	# PSMs	# Proteins	# Protein Groups	Protein Group Accessions	Modifications	MH+ [Da]	A2	IonScore A2	Exp Value A2	A4	XCorr A4	# Missed Cleavages
	GVVDSEDLPLNISR	2	1	1	154146191;P07900		1513.79				High	3.35982	0
	ADLINNLGTIAK	2	1	1	154146191;P07900		1242.71				High	3.35847	0
	YIDQEELNK	2	1	1	154146191;P07900		1151.56				Medium	2.49168	0
	HIYYITGETK	1	1	1	154146191;P07900		1224.63				Low	2.15375	0
	DQVANSAFVER	1	1	1	154146191;P07900		1235.6				Low	2.0115	0
P08107	Heat shock 70 kDa protein 1A/1B OS=Homo sapiens GN=HSPA1A PE=1 SV=5 - [HSP71_HUMAN]	42.43	1	19	21	65		0			207.481	42.43	21	65	641	70.009	5.65576
	Sequence	# PSMs	# Proteins	# Protein Groups	Protein Group Accessions	Modifications	MH+ [Da]	A2	IonScore A2	Exp Value A2	A4	XCorr A4	# Missed Cleavages
	SINPDEAVAYGAAVQAAILMGDK	2	1	1	167466173;P08107	M20(Oxidation)	2320.15				High	5.2054	0
	SINPDEAVAYGAAVQAAILMGDK	3	1	1	167466173;P08107		2304.16				High	5.19596	0
	NQVALNPQNTVFDAK	4	1	1	167466173;P08107		1658.85				High	4.86353	0
	MKEIAEAYLGYPVTNAVITVPAYFNDSQR	1	1	1	167466173;P08107		3260.63				High	4.33258	1
	HWPFQVINDGDKPK	3	1	1	167466173;P08107		1680.85				High	4.11808	0
	IINEPTAAAIAYGLDR	4	1	1	167466173;P08107		1687.9				High	3.69349	0
	LDKAQIHDLVLVGGSTR	2	1	1	167466173;P08107		1822.02				High	3.69001	1
	MKEIAEAYLGYPVTNAVITVPAYFNDSQR	3	1	1	167466173;P08107	M1(Oxidation)	3276.63				High	3.62223	1
	MVQEAEKYKAEDEVQR	2	1	1	167466173;P08107		1952.94				High	3.55465	2
	DAGVIAGLNVLR	4	1	1	167466173;P08107		1197.7				High	3.45264	0
	AQIHDLVLVGGSTR	2	1	1	167466173;P08107		1465.81				High	3.39029	0
	MVQEAEKYKAEDEVQR	2	1	1	167466173;P08107	M1(Oxidation)	1968.93				High	3.38323	2
	ARFEELCSDLFR	3	1	1	167466173;P08107	C7(Carbamidomethyl)	1542.74				High	3.32028	1
	ATAGDTHLGGEDFDNR	2	1	1	167466173;P08107		1675.73				High	3.30418	0
	VEIIANDQGNR	6	2	2	16507237;P11021;167466173;P08107		1228.63				High	3.02372	0
	AFYPEEISSMVLTK	4	1	1	167466173;P08107		1614.81				High	2.9354	0
	CQEVISWLDANTLAEKDEFEHK	1	1	1	167466173;P08107	C1(Carbamidomethyl)	2662.25				Low	2.85245	1
	LVNHFVEEFK	2	1	1	167466173;P08107		1261.66				High	2.80355	0
	TTPSYVAFTDTER	4	1	1	167466173;P08107		1487.7				High	2.77796	0
	KFGDPVVQSDMK	2	1	1	167466173;P08107		1350.67				High	2.74518	1
	NALESYAFNMK	3	1	1	167466173;P08107		1287.6				High	2.63447	0
	FGDPVVQSDMK	2	1	1	167466173;P08107		1222.58				Medium	2.54547	0
	FEELCSDLFR	2	1	1	167466173;P08107	C5(Carbamidomethyl)	1315.6				Medium	2.45998	0
	LLQDFFNGR	2	1	1	167466173;P08107		1109.57				Low	2.13587	0
Q9NZI8	Insulin-like growth factor 2 mRNA-binding protein 1 OS=Homo sapiens GN=IGF2BP1 PE=1 SV=2 - [IF2B1_HUMAN]	4.51	1	1	2	2		0			4.49598	4.51	2	2	577	63.4412	9.20264
	Sequence	# PSMs	# Proteins	# Protein Groups	Protein Group Accessions	Modifications	MH+ [Da]	A2	IonScore A2	Exp Value A2	A4	XCorr A4	# Missed Cleavages
	DQTPDENDQVIVK	1	1	1	56237027;Q9NZI8		1500.72				Medium	2.38241	0
	MVIITGPPEAQFK	1	1	1	56237027;Q9NZI8		1430.77				Low	2.11357	0
Q12905	Interleukin enhancer-binding factor 2 OS=Homo sapiens GN=ILF2 PE=1 SV=2 - [ILF2_HUMAN]	18.21	1	4	4	9		0			27.8196	18.21	4	9	390	43.0352	5.26221
	Sequence	# PSMs	# Proteins	# Protein Groups	Protein Group Accessions	Modifications	MH+ [Da]	A2	IonScore A2	Exp Value A2	A4	XCorr A4	# Missed Cleavages
	AQDPSEVLTMLTNETGFEISSSDATVK	3	1	1	13385872;Q12905		2870.36				High	3.9974	0
	NQDLAPNSAEQASILSLVTK	2	1	1	13385872;Q12905		2099.1				High	3.38577	0
	ILPTLEAVAALGNK	2	1	1	13385872;Q12905		1409.84				High	3.28119	0
	VLQSALAAIR	2	1	1	13385872;Q12905		1041.64				Medium	2.57427	0
P12268	Inosine-5'-monophosphate dehydrogenase 2 OS=Homo sapiens GN=IMPDH2 PE=1 SV=2 - [IMDH2_HUMAN]	9.53	1	3	3	3		0			10.8284	9.53	3	3	514	55.7696	6.90283
	Sequence	# PSMs	# Proteins	# Protein Groups	Protein Group Accessions	Modifications	MH+ [Da]	A2	IonScore A2	Exp Value A2	A4	XCorr A4	# Missed Cleavages
	DKYPNLQVIGGNVVTAAQAK	1	1	1	66933016;P12268		2086.13				High	5.34832	1
	TSSAQVEGGVHSLHSYEK	1	1	1	66933016;P12268		1915.91				High	3.0898	0
	NLIDAGVDALR	1	1	1	66933016;P12268		1156.63				Medium	2.39028	0
P13645	Keratin, type I cytoskeletal 10 OS=Homo sapiens GN=KRT10 PE=1 SV=6 - [K1C10_HUMAN]	41.27	1	20	21	63		0			224.227	41.27	21	63	584	58.7917	5.21143
	Sequence	# PSMs	# Proteins	# Protein Groups	Protein Group Accessions	Modifications	MH+ [Da]	A2	IonScore A2	Exp Value A2	A4	XCorr A4	# Missed Cleavages
	ADLEMQIESLTEELAYLK	5	1	1	269849769;P13645		2096.05				High	5.47481	0
	ADLEMQIESLTEELAYLKK	2	1	1	269849769;P13645		2224.14				High	5.27136	1
	ADLEMQIESLTEELAYLK	6	1	1	269849769;P13645	M5(Oxidation)	2112.04				High	5.23327	0
	AETECQNTEYQQLLDIK	2	1	1	269849769;P13645	C5(Carbamidomethyl)	2082.97				High	5.21421	0
	SKELTTEIDNNIEQISSYK	5	1	1	269849769;P13645		2212.1				High	5.16793	1
	TIDDLKNQILNLTTDNANILLQIDNAR	3	1	1	269849769;P13645		3052.63				High	5.1016	1
	ELTTEIDNNIEQISSYK	2	1	1	269849769;P13645		1996.97				High	5.0832	0
	GSLGGGFSSGGFSGGSFSR	2	1	1	269849769;P13645		1707.77				High	4.84281	0
	NVQALEIELQSQLALK	3	1	1	269849769;P13645		1797.01				High	3.82453	0
	NVSTGDVNVEMNAAPGVDLTQLLNNMR	1	1	1	269849769;P13645	M11(Oxidation)	2888.39				High	3.58745	0
	IRLENEIQTYR	2	1	1	269849769;P13645		1434.77				High	3.54964	1
	SQYEQLAEQNRK	2	1	1	269849769;P13645		1493.73				High	3.38766	1
	NVSTGDVNVEMNAAPGVDLTQLLNNMR	1	1	1	269849769;P13645		2872.4				High	3.18142	0
	LENEIQTYR	2	1	1	269849769;P13645		1165.58				High	3.13217	0
	ALEESNYELEGK	5	1	1	269849769;P13645		1381.65				High	3.08987	0
	ADLEMQIESLTEELAYLKK	2	1	1	269849769;P13645	M5(Oxidation)	2240.14				Medium	3.05423	1
	LKYENEVALR	3	1	1	269849769;P13645		1234.68				Medium	3.01995	1
	SQYEQLAEQNR	2	1	1	269849769;P13645		1365.64				High	3.01723	0
	SLLEGEGSSGGGGR	3	1	1	269849769;P13645		1262.6				High	2.77629	0
	YENEVALR	2	1	1	269849769;P13645		993.499				High	2.68725	0
	DAEAWFNEK	1	1	1	269849769;P13645		1109.49				Medium	2.42574	0
	QSLEASLAETEGR	4	1	1	269849769;P13645		1390.68				Medium	2.42099	0
	VLDELTLTK	2	1	1	269849769;P13645		1031.6				Medium	2.39933	0
	LAADDFR	1	2	2	269849769;P13645;229463044;P02533		807.4				Low	2.0636	0
P02533	Keratin, type I cytoskeletal 14 OS=Homo sapiens GN=KRT14 PE=1 SV=4 - [K1C14_HUMAN]	28.81	1	8	11	20		0			56.2293	28.81	11	20	472	51.5294	5.16064
	Sequence	# PSMs	# Proteins	# Protein Groups	Protein Group Accessions	Modifications	MH+ [Da]	A2	IonScore A2	Exp Value A2	A4	XCorr A4	# Missed Cleavages
	LLEGEDAHLSSSQFSSGSQSSR	2	1	1	229463044;P02533		2309.06				High	4.07707	0
	EVATNSELVQSGK	2	1	1	229463044;P02533		1361.69				High	3.75692	0
	TRLEQEIATYR	2	1	1	229463044;P02533		1379.73				High	3.32897	1
	ISSVLAGGSCR	2	1	1	229463044;P02533	C10(Carbamidomethyl)	1106.56				High	2.86326	0
	GSCGIGGGIGGGSSR	2	1	1	229463044;P02533	C3(Carbamidomethyl)	1278.59				High	2.79568	0
	VLDELTLAR	2	1	1	229463044;P02533		1029.59				High	2.64106	0
	ALEEANADLEVK	3	1	1	229463044;P02533		1301.66				Medium	2.50822	0
	APSTYGGGLSVSSSR	2	1	1	229463044;P02533		1425.7				Medium	2.4931	0
	ASLENSLEETK	1	1	1	229463044;P02533		1220.6				Low	2.16746	0
	TKYETELNLR	1	1	1	229463044;P02533		1266.67				Low	2.10112	1
	LAADDFR	1	2	2	269849769;P13645;229463044;P02533		807.4				Low	2.0636	0
P35527	Keratin, type I cytoskeletal 9 OS=Homo sapiens GN=KRT9 PE=1 SV=3 - [K1C9_HUMAN]	51.2	1	16	16	51		0			205.676	51.2	16	51	623	62.0268	5.23682
	Sequence	# PSMs	# Proteins	# Protein Groups	Protein Group Accessions	Modifications	MH+ [Da]	A2	IonScore A2	Exp Value A2	A4	XCorr A4	# Missed Cleavages
	GGSGGSHGGGSGFGGESGGSYGGGEEASGSGGGYGGGSGK	1	1	1	55956899;P35527		3223.27				High	6.94258	0
	HGVQELEIELQSQLSK	3	1	1	55956899;P35527		1837.97				High	6.05368	0
	DIENQYETQITQIEHEVSSSGQEVQSSAK	6	1	1	55956899;P35527		3264.52				High	5.99331	0
	HGVQELEIELQSQLSKK	2	1	1	55956899;P35527		1966.06				High	5.71537	1
	EIETYHNLLEGGQEDFESSGAGK	6	1	1	55956899;P35527		2510.14				High	5.01005	0
	QEIECQNQEYSLLLSIK	1	1	1	55956899;P35527	C5(Carbamidomethyl)	2095.04				High	4.98896	0
	GGSGGSYGGGSGSGGGSGGGYGGGSGGGHSGGSGGGHSGGSGGNYGGGSGSGGGSGGGYGGGSGSR	3	1	1	55956899;P35527		4972.94				High	4.78045	0
	VQALEEANNDLENK	2	1	1	55956899;P35527		1586.77				High	4.73958	0
	NYSPYYNTIDDLKDQIVDLTVGNNK	14	1	1	55956899;P35527		2902.41				High	4.17619	1
	GGSGGSYGGGGSGGGYGGGSGSR	3	1	1	55956899;P35527		1791.73				High	3.97558	0
	LASYLDKVQALEEANNDLENK	2	1	1	55956899;P35527		2377.19				High	3.82565	1
	TLNDMRQEYEQLIAK	1	1	1	55956899;P35527		1851.93				High	3.16263	1
	FSSSSGYGGGSSR	1	1	1	55956899;P35527		1235.53				High	3.11674	0
	TLNDMRQEYEQLIAK	1	1	1	55956899;P35527	M5(Oxidation)	1867.92				High	2.78401	1
	TLLDIDNTR	3	1	1	55956899;P35527		1060.56				Medium	2.45272	0
	QGVDADINGLR	1	1	1	55956899;P35527		1157.59				Medium	2.34277	0
	IKFEMEQNLR	1	1	1	55956899;P35527	M5(Oxidation)	1323.67				Low	2.13692	1
P35908	Keratin, type II cytoskeletal 2 epidermal OS=Homo sapiens GN=KRT2 PE=1 SV=2 - [K22E_HUMAN]	30.52	1	9	14	35		0			104.166	30.52	14	35	639	65.3932	8.00146
	Sequence	# PSMs	# Proteins	# Protein Groups	Protein Group Accessions	Modifications	MH+ [Da]	A2	IonScore A2	Exp Value A2	A4	XCorr A4	# Missed Cleavages
	NKLNDLEEALQQAKEDLAR	2	1	1	47132620;P35908		2198.14				High	3.74969	2
	FLEQQNQVLQTK	8	2	2	47132620;P35908;119395750;P04264		1475.78				High	3.68213	0
	GFSSGSAVVSGGSR	2	1	1	47132620;P35908		1254.61				High	3.63866	0
	GGSGGGGSISGGGYGSGGGSGGR	1	1	1	47132620;P35908		1741.75				High	3.61424	0
	NLDLDSIIAEVK	4	2	2	47132620;P35908;119703753;P04259		1329.73				High	3.54702	0
	TSQNSELNNMQDLVEDYKK	1	1	1	47132620;P35908		2256.04				High	3.48218	1
	TAAENDFVTLKK	2	1	1	47132620;P35908		1336.71				High	3.06494	1
	VLYDAEISQIHQSVTDTNVILSMDNSR	1	1	1	47132620;P35908	M23(Oxidation)	3064.49				Medium	3.05977	0
	VDLLNQEIEFLK	3	1	1	47132620;P35908		1460.8				High	2.87104	0
	AQYEEIAQR	1	2	2	47132620;P35908;119703753;P04259		1107.54				High	2.74489	0
	IEISELNR	4	2	2	47132620;P35908;119395750;P04264		973.532				High	2.6487	0
	STSSFSCLSR	2	1	1	47132620;P35908	C7(Carbamidomethyl)	1131.51				High	2.63474	0
	YLDGLTAER	2	1	1	47132620;P35908		1037.53				Medium	2.57127	0
	DYQELMNVK	2	1	1	47132620;P35908		1139.54				Low	2.16368	0
P04264	Keratin, type II cytoskeletal 1 OS=Homo sapiens GN=KRT1 PE=1 SV=6 - [K2C1_HUMAN]	44.88	1	22	27	92		0			301.187	44.88	27	92	644	65.999	8.11865
	Sequence	# PSMs	# Proteins	# Protein Groups	Protein Group Accessions	Modifications	MH+ [Da]	A2	IonScore A2	Exp Value A2	A4	XCorr A4	# Missed Cleavages
	GGGGGGYGSGGSSYGSGGGSYGSGGGGGGGR	7	1	1	119395750;P04264		2383.96				High	5.29994	0
	NKLNDLEDALQQAKEDLAR	3	1	1	119395750;P04264		2184.13				High	5.09017	2
	NKLNDLEDALQQAK	4	1	1	119395750;P04264		1599.83				High	4.16934	1
	MSGECAPNVSVSVSTSHTTISGGGSR	2	1	1	119395750;P04264	M1(Oxidation); C5(Carbamidomethyl)	2581.16				High	4.15572	0
	MSGECAPNVSVSVSTSHTTISGGGSR	2	1	1	119395750;P04264	C5(Carbamidomethyl)	2565.17				High	4.14143	0
	FSSCGGGGGSFGAGGGFGSR	1	1	1	119395750;P04264	C4(Carbamidomethyl)	1765.74				High	4.03406	0
	LNDLEDALQQAK	2	1	1	119395750;P04264		1357.7				High	3.8215	0
	FLEQQNQVLQTK	8	2	2	47132620;P35908;119395750;P04264		1475.78				High	3.68213	0
	SLDLDSIIAEVK	19	1	1	119395750;P04264		1302.72				High	3.67951	0
	THNLEPYFESFINNLR	2	1	1	119395750;P04264		1993.98				High	3.59261	0
	LNDLEDALQQAKEDLAR	2	1	1	119395750;P04264		1941.99				High	3.55564	1
	SLNNQFASFIDK	4	1	1	119395750;P04264		1383.69				High	3.41052	0
	YEELQITAGR	6	2	2	119395750;P04264;119703753;P04259		1179.6				High	3.38666	0
	QISNLQQSISDAEQR	2	1	1	119395750;P04264		1716.85				High	3.3664	0
	LDSELKNMQDMVEDYR	2	1	1	119395750;P04264	M8(Oxidation); M11(Oxidation)	2017.88				High	3.27803	1
	SLDLDSIIAEVKAQYEDIAQK	1	1	1	119395750;P04264		2349.22				High	3.23763	1
	WELLQQVDTSTR	2	1	1	119395750;P04264		1475.75				High	3.21549	0
	TNAENEFVTIKK	2	1	1	119395750;P04264		1393.73				High	3.19293	1
	SGGGFSSGSAGIINYQR	1	1	1	119395750;P04264		1657.79				High	3.10536	0
	NMQDMVEDYR	3	1	1	119395750;P04264	M2(Oxidation); M5(Oxidation)	1332.52				High	3.06124	0
	LLRDYQELMNTK	1	1	1	119395750;P04264		1523.79				Medium	3.01841	1
	LALDLEIATYR	1	1	1	119395750;P04264		1277.71				High	2.69662	0
	AEAESLYQSK	2	1	1	119395750;P04264		1125.54				High	2.67646	0
	IEISELNR	4	2	2	47132620;P35908;119395750;P04264		973.532				High	2.6487	0
	TNAENEFVTIK	2	1	1	119395750;P04264		1265.64				Medium	2.42201	0
	TLLEGEESR	1	1	1	119395750;P04264		1033.52				Medium	2.39122	0
	NMQDMVEDYR	2	1	1	119395750;P04264		1300.53				Low	2.32837	0
	AQYEDIAQK	2	1	1	119395750;P04264		1065.52				Low	2.28806	0
	DYQELMNTK	2	1	1	119395750;P04264		1141.52				Low	2.03425	0
P04259	Keratin, type II cytoskeletal 6B OS=Homo sapiens GN=KRT6B PE=1 SV=5 - [K2C6B_HUMAN]	10.28	1	2	5	13		0			38.6439	10.28	5	13	564	60.0303	8.00146
	Sequence	# PSMs	# Proteins	# Protein Groups	Protein Group Accessions	Modifications	MH+ [Da]	A2	IonScore A2	Exp Value A2	A4	XCorr A4	# Missed Cleavages
	NLDLDSIIAEVK	4	2	2	47132620;P35908;119703753;P04259		1329.73				High	3.54702	0
	YEELQITAGR	6	2	2	119395750;P04264;119703753;P04259		1179.6				High	3.38666	0
	QNLEPLFEQYINNLR	1	1	1	119703753;P04259		1890.97				High	2.9427	0
	AQYEEIAQR	1	2	2	47132620;P35908;119703753;P04259		1107.54				High	2.74489	0
	ADTLTDEINFLR	1	1	1	119703753;P04259		1407.71				Medium	2.34944	0
P12277	Creatine kinase B-type OS=Homo sapiens GN=CKB PE=1 SV=1 - [KCRB_HUMAN]	21.52	1	5	5	9		0			29.8182	21.52	5	9	381	42.6173	5.59229
	Sequence	# PSMs	# Proteins	# Protein Groups	Protein Group Accessions	Modifications	MH+ [Da]	A2	IonScore A2	Exp Value A2	A4	XCorr A4	# Missed Cleavages
	GTGGVDTAAVGGVFDVSNADR	1	1	1	21536286;P12277		1964.93				High	4.73385	0
	LGFSEVELVQMVVDGVK	2	1	1	21536286;P12277		1848.98				High	3.83231	0
	LAVEALSSLDGDLAGR	2	1	1	21536286;P12277		1586.84				High	3.44998	0
	FCTGLTQIETLFK	2	1	1	21536286;P12277	C2(Carbamidomethyl)	1557.8				High	3.29203	0
	LEQGQAIDDLMPAQK	2	1	1	21536286;P12277		1656.83				High	2.94355	0
P14618	Pyruvate kinase isozymes M1/M2 OS=Homo sapiens GN=PKM PE=1 SV=4 - [KPYM_HUMAN]	17.51	1	4	6	15		0			51.4389	17.51	6	15	531	57.9	7.84033
	Sequence	# PSMs	# Proteins	# Protein Groups	Protein Group Accessions	Modifications	MH+ [Da]	A2	IonScore A2	Exp Value A2	A4	XCorr A4	# Missed Cleavages
	FGVEQDVDMVFASFIR	3	1	1	33286418;P14618	M9(Oxidation)	1875.9				High	5.49867	0
	LAPITSDPTEATAVGAVEASFK	1	1	1	33286418;P14618		2175.12				High	4.23549	0
	GIFPVLCKDPVQEAWAEDVDLR	3	1	1	33286418;P14618	C7(Carbamidomethyl)	2557.28				High	4.16122	1
	FGVEQDVDMVFASFIR	2	1	1	33286418;P14618		1859.9				High	3.46477	0
	NTGIICTIGPASR	3	1	1	33286418;P14618	C6(Carbamidomethyl)	1359.71				High	3.11893	0
	GDLGIEIPAEK	2	1	1	33286418;P14618		1141.61				Low	2.20968	0
	VNFAMNVGK	1	1	1	33286418;P14618		979.502				Low	2.02073	0
P05455	Lupus La protein OS=Homo sapiens GN=SSB PE=1 SV=2 - [LA_HUMAN]	17.4	1	4	5	6		0			18.9017	17.4	5	6	408	46.8082	7.12256
	Sequence	# PSMs	# Proteins	# Protein Groups	Protein Group Accessions	Modifications	MH+ [Da]	A2	IonScore A2	Exp Value A2	A4	XCorr A4	# Missed Cleavages
	SKAELMEISEDKTK	1	1	1	10835067;P05455		1608.81				High	3.86681	2
	LTTDFNVIVEALSK	2	1	1	10835067;P05455		1549.85				High	3.61166	0
	LDEGWVPLEIMIK	1	1	1	10835067;P05455		1542.82				High	3.285	0
	IIEDQQESLNK	1	1	1	10835067;P05455		1316.67				High	2.9637	0
	RSPSKPLPEVTDEYKNDVK	1	1	1	10835067;P05455		2202.14				Low	2.24046	2
P00338	L-lactate dehydrogenase A chain OS=Homo sapiens GN=LDHA PE=1 SV=2 - [LDHA_HUMAN]	25.6	1	0	7	25		0			37.276	20.78	6	11	332	36.6654	8.26514
	Sequence	# PSMs	# Proteins	# Protein Groups	Protein Group Accessions	Modifications	MH+ [Da]	A2	IonScore A2	Exp Value A2	A4	XCorr A4	# Missed Cleavages
	LLIVSNPVDILTYVAWK	8	3	3	5031857;P00338;13786849;380765070		1944.12	High	122.17	2.89626e-10	High	5.21965	0
	VIGSGCNLDSAR	4	6	6	5031857;P00338;4557032;P07195;13786847;13786849;49259209;380765070	C6(Carbamidomethyl)	1248.6	High	75.83	2.44446e-05	High	2.70298	0
	VTLTSEEEAR	4	3	3	13786849;380765070;5031857;P00338		1134.56	Medium	46.59	0.0287356	Low	2.23385	0
	LVIITAGAR	4	3	3	13786849;380765070;5031857;P00338		913.584	Medium	41.52	0.0353474	Low	2.2455	0
	SADTLWGIQK	2	3	3	5031857;P00338;13786849;380765070		1118.58	Low	36.6	0.385626	High	2.7958	0
	QVVESAYEVIK	2	3	3	5031857;P00338;13786849;380765070		1264.68	Low	34.55	0.610747	Medium	2.42829	0
	TLHPDLGTDKDKEQWK	1	3	3	13786849;380765070;5031857;P00338		1910.96	Low	12.19	85.5795			2
P07195	L-lactate dehydrogenase B chain OS=Homo sapiens GN=LDHB PE=1 SV=2 - [LDHB_HUMAN]	28.74	1	0	8	35		0			45.645	26.05	7	16	334	36.6151	6.04932
	Sequence	# PSMs	# Proteins	# Protein Groups	Protein Group Accessions	Modifications	MH+ [Da]	A2	IonScore A2	Exp Value A2	A4	XCorr A4	# Missed Cleavages
	VIGSGCNLDSAR	4	6	6	5031857;P00338;4557032;P07195;13786847;13786849;49259209;380765070	C6(Carbamidomethyl)	1248.6	High	75.83	2.44446e-05	High	2.70298	0
	LIAPVAEEEATVPNNK	4	3	3	4557032;P07195;13786847;49259209		1694.9	High	74.31	5.39544e-05	High	3.40104	0
	IVADKDYSVTANSK	7	3	3	4557032;P07195;13786847;49259209		1510.77	High	72.43	7.68839e-05	High	4.37738	1
	SADTLWDIQK	4	3	3	13786847;49259209;4557032;P07195		1176.59	High	69.52	0.000161716	Low	2.16024	0
	MVVESAYEVIK	2	3	3	13786847;49259209;4557032;P07195		1267.66	High	63.36	0.000609285	Low	2.19634	0
	SLADELALVDVLEDK	4	3	3	4557032;P07195;13786847;49259209		1629.86	High	62	0.000980602	High	2.99885	0
	IVVVTAGVR	4	3	3	4557032;P07195;13786847;49259209		913.583	Medium	46.52	0.0111778	High	2.71597	0
	MVVESAYEVIK	4	3	3	4557032;P07195;13786847;49259209	M1(Oxidation)	1283.65	Medium	44.62	0.0381315	High	2.90323	0
	GLTSVINQK	2	3	3	13786847;49259209;4557032;P07195		959.553	Low	37.09	0.289252			0
Q8IYB1	Protein MB21D2 OS=Homo sapiens GN=MB21D2 PE=1 SV=3 - [M21D2_HUMAN]	18.33	1	7	7	15		0			49.2461	18.33	7	15	491	55.7643	7.03467
	Sequence	# PSMs	# Proteins	# Protein Groups	Protein Group Accessions	Modifications	MH+ [Da]	A2	IonScore A2	Exp Value A2	A4	XCorr A4	# Missed Cleavages
	RGSTTSIPSPQSDGGDPNQPDDR	2	1	1	197333817;Q8IYB1		2384.07				High	4.4906	1
	LPVANEYLLLSGGVR	2	1	1	197333817;Q8IYB1		1600.91				High	4.09188	0
	MLYDIVPVVSFK	2	1	1	197333817;Q8IYB1		1410.77				High	3.74528	0
	GSTTSIPSPQSDGGDPNQPDDR	1	1	1	197333817;Q8IYB1		2227.97				High	3.41046	0
	DFIFSMLGMVQK	1	1	1	197333817;Q8IYB1		1415.71				High	3.27831	0
	GTDYDMDFTLLVPALK	6	1	1	197333817;Q8IYB1		1798.9				High	3.16506	0
	KLQQLVTENPGK	1	1	1	197333817;Q8IYB1		1354.77				High	3.0271	1
Q13765	Nascent polypeptide-associated complex subunit alpha OS=Homo sapiens GN=NACA PE=1 SV=1 - [NACA_HUMAN]	13.49	1	2	2	2		0			8.05695	13.49	2	2	215	23.3697	4.56396
	Sequence	# PSMs	# Proteins	# Protein Groups	Protein Group Accessions	Modifications	MH+ [Da]	A2	IonScore A2	Exp Value A2	A4	XCorr A4	# Missed Cleavages
	IEDLSQQAQLAAAEK	1	1	1	163965364;Q13765		1614.83				High	4.45126	0
	SPASDTYIVFGEAK	1	1	1	163965364;Q13765		1484.73				High	3.60569	0
Q15233	Non-POU domain-containing octamer-binding protein OS=Homo sapiens GN=NONO PE=1 SV=4 - [NONO_HUMAN]	7.86	1	2	2	10		0			35.1836	7.86	2	10	471	54.1973	8.95361
	Sequence	# PSMs	# Proteins	# Protein Groups	Protein Group Accessions	Modifications	MH+ [Da]	A2	IonScore A2	Exp Value A2	A4	XCorr A4	# Missed Cleavages
	NLPQYVSNELLEEAFSVFGQVER	8	1	1	34932414;Q15233		2668.33				High	4.51318	0
	FAQPGSFEYEYAMR	2	1	1	34932414;Q15233		1695.75				High	4.15475	0
P06748	Nucleophosmin OS=Homo sapiens GN=NPM1 PE=1 SV=2 - [NPM_HUMAN]	41.16	1	5	6	18		0			83.2565	41.16	6	18	294	32.5548	4.77979
	Sequence	# PSMs	# Proteins	# Protein Groups	Protein Group Accessions	Modifications	MH+ [Da]	A2	IonScore A2	Exp Value A2	A4	XCorr A4	# Missed Cleavages
	LAADEDDDDDDEEDDDEDDDDDDFDDEEAEEKAPVKK	3	1	1	10835063;P06748		4246.55				High	7.04518	2
	TVSLGAGAKDELHIVEAEAMNYEGSPIK	6	1	1	10835063;P06748		2929.46				High	6.06142	1
	MSVQPTVSLGGFEITPPVVLR	2	1	1	10835063;P06748	M1(Oxidation)	2243.21				High	5.05762	0
	MSVQPTVSLGGFEITPPVVLR	2	1	1	10835063;P06748		2227.22				High	4.37586	0
	VDNDENEHQLSLR	1	1	1	10835063;P06748		1568.73				High	3.57666	0
	MTDQEAIQDLWQWR	2	1	1	10835063;P06748		1819.84				High	3.42906	0
	TVSLGAGAKDELHIVEAEAMNYEGSPIK	1	1	1	10835063;P06748	M20(Oxidation)	2945.46				High	3.35064	1
	ADKDYHFKVDNDENEHQLSLR	1	1	1	10835063;P06748		2573.2				Low	2.64554	2
Q9BY77	Polymerase delta-interacting protein 3 OS=Homo sapiens GN=POLDIP3 PE=1 SV=2 - [PDIP3_HUMAN]	10.21	1	3	3	4		0			11.6232	10.21	3	4	421	46.0605	9.99365
	Sequence	# PSMs	# Proteins	# Protein Groups	Protein Group Accessions	Modifications	MH+ [Da]	A2	IonScore A2	Exp Value A2	A4	XCorr A4	# Missed Cleavages
	VVQNDAYTAPALPSSIR	1	1	1	29837655;Q9BY77		1801.95				High	3.88133	0
	LVHPGVAEVVFVK	1	1	1	29837655;Q9BY77		1393.82				High	3.27886	0
	VGIQQGLLSQSTR	2	1	1	29837655;Q9BY77		1386.77				Low	2.24663	0
Q06830	Peroxiredoxin-1 OS=Homo sapiens GN=PRDX1 PE=1 SV=1 - [PRDX1_HUMAN]	31.16	1	3	5	8		0			22.4623	31.16	5	8	199	22.0963	8.1333
	Sequence	# PSMs	# Proteins	# Protein Groups	Protein Group Accessions	Modifications	MH+ [Da]	A2	IonScore A2	Exp Value A2	A4	XCorr A4	# Missed Cleavages
	HGEVCPAGWKPGSDTIKPDVQK	2	1	1	4505591;Q06830	C5(Carbamidomethyl)	2406.19				High	4.261	0
	QITVNDLPVGR	2	1	1	4505591;Q06830		1211.67				High	2.64838	0
	TIAQDYGVLK	2	1	1	4505591;Q06830		1107.6				Medium	2.57602	0
	ADEGISFR	1	1	1	4505591;Q06830		894.432				Low	2.11839	0
	ATAVMPDGQFK	1	1	1	4505591;Q06830		1164.57				Low	2.03803	0
P17980	26S protease regulatory subunit 6A OS=Homo sapiens GN=PSMC3 PE=1 SV=3 - [PRS6A_HUMAN]	7.74	1	0	2	4		0			5.66942	7.74	2	2	439	49.1725	5.23682
	Sequence	# PSMs	# Proteins	# Protein Groups	Protein Group Accessions	Modifications	MH+ [Da]	A2	IonScore A2	Exp Value A2	A4	XCorr A4	# Missed Cleavages
	TMLELLNQLDGFQPNTQVK	2	2	2	263098;21361144;P17980		2189.12	High	58.18	0.00242976	High	3.48753	0
	QTYFLPVIGLVDAEK	2	2	2	21361144;P17980;263098		1692.92	Low	32.79	0.658153	Low	2.18188	0
O00232	26S proteasome non-ATPase regulatory subunit 12 OS=Homo sapiens GN=PSMD12 PE=1 SV=3 - [PSD12_HUMAN]	7.89	1	2	2	3		0			11.1226	7.89	2	3	456	52.8706	7.6499
	Sequence	# PSMs	# Proteins	# Protein Groups	Protein Group Accessions	Modifications	MH+ [Da]	A2	IonScore A2	Exp Value A2	A4	XCorr A4	# Missed Cleavages
	LQEVIETLLSLEK	2	1	1	4506221;O00232		1514.87				High	4.23097	0
	MAQLLDLSVDESEAFLSNLVVNK	1	1	1	4506221;O00232		2535.31				High	3.93549	0
P26599	Polypyrimidine tract-binding protein 1 OS=Homo sapiens GN=PTBP1 PE=1 SV=1 - [PTBP1_HUMAN]	11.68	1	2	2	2		0			8.22735	11.68	2	2	531	57.1856	9.17334
	Sequence	# PSMs	# Proteins	# Protein Groups	Protein Group Accessions	Modifications	MH+ [Da]	A2	IonScore A2	Exp Value A2	A4	XCorr A4	# Missed Cleavages
	IAIPGLAGAGNSVLLVSNLNPER	1	1	1	14165466;P26599		2275.28				High	4.2996	0
	AQAALQAVNSVQSGNLALAASAAAVDAGMAMAGQSPVLR	1	1	1	14165466;P26599		3680.89				High	3.92775	0
P22234	Multifunctional protein ADE2 OS=Homo sapiens GN=PAICS PE=1 SV=3 - [PUR6_HUMAN]	20.24	1	0	5	16		0			29.4076	20.24	5	8	425	47.0491	7.2251
	Sequence	# PSMs	# Proteins	# Protein Groups	Protein Group Accessions	Modifications	MH+ [Da]	A2	IonScore A2	Exp Value A2	A4	XCorr A4	# Missed Cleavages
	ITSCIFQLLQEAGIK	6	2	2	5453539;P22234;126030593	C4(Carbamidomethyl)	1720.93	High	95.25	4.16132e-07	High	4.52139	0
	EIVLADVIDNDSWR	4	2	2	5453539;P22234;126030593		1644.82	High	77.89	2.34396e-05	High	3.59011	0
	TKEVYELLDSPGK	2	2	2	5453539;P22234;126030593		1478.77	Medium	51.93	0.0110734	High	2.92764	1
	IKAEYEGDGIPTVFVAVAGR	2	2	2	5453539;P22234;126030593		2092.11	Low	26.11	3.47963	High	3.32935	1
	VELFFKDDANNDPQWSEEQLIAAK	2	2	2	5453539;P22234;126030593		2807.36	Low	17.5	19.7389	High	3.22938	1
Q9H0U4	Ras-related protein Rab-1B OS=Homo sapiens GN=RAB1B PE=1 SV=1 - [RAB1B_HUMAN]	18.91	1	0	3	4		0			10.8705	18.91	3	4	201	22.1572	5.73193
	Sequence	# PSMs	# Proteins	# Protein Groups	Protein Group Accessions	Modifications	MH+ [Da]	A2	IonScore A2	Exp Value A2	A4	XCorr A4	# Missed Cleavages
	EFADSLGIPFLETSAK	2	2	2	13569962;Q9H0U4;193806493;Q92928		1724.88				High	3.79114	0
	LQIWDTAGQER	1	2	2	13569962;Q9H0U4;193806493;Q92928		1316.66				Medium	2.34942	0
	LLLIGDSGVGK	1	2	2	13569962;Q9H0U4;193806493;Q92928		1071.64				Low	2.13283	0
Q92928	Putative Ras-related protein Rab-1C OS=Homo sapiens GN=RAB1C PE=5 SV=2 - [RAB1C_HUMAN]	18.91	1	0	3	4		0			10.8705	18.91	3	4	201	22.003	5.42725
	Sequence	# PSMs	# Proteins	# Protein Groups	Protein Group Accessions	Modifications	MH+ [Da]	A2	IonScore A2	Exp Value A2	A4	XCorr A4	# Missed Cleavages
	EFADSLGIPFLETSAK	2	2	2	13569962;Q9H0U4;193806493;Q92928		1724.88				High	3.79114	0
	LQIWDTAGQER	1	2	2	13569962;Q9H0U4;193806493;Q92928		1316.66				Medium	2.34942	0
	LLLIGDSGVGK	1	2	2	13569962;Q9H0U4;193806493;Q92928		1071.64				Low	2.13283	0
P26373	60S ribosomal protein L13 OS=Homo sapiens GN=RPL13 PE=1 SV=4 - [RL13_HUMAN]	11.37	1	2	2	4		0			10.4015	11.37	2	4	211	24.2465	11.6489
	Sequence	# PSMs	# Proteins	# Protein Groups	Protein Group Accessions	Modifications	MH+ [Da]	A2	IonScore A2	Exp Value A2	A4	XCorr A4	# Missed Cleavages
	STESLQANVQR	2	1	1	15431295;P26373		1232.62				High	3.0082	0
	LATQLTGPVMPVR	1	1	1	15431295;P26373		1382.78				Medium	2.37677	0
	LATQLTGPVMPVR	1	1	1	15431295;P26373	M10(Oxidation)	1398.78				Low	2.30761	0
P50914	60S ribosomal protein L14 OS=Homo sapiens GN=RPL14 PE=1 SV=4 - [RL14_HUMAN]	10.7	1	2	2	4		0			11.7852	10.7	2	4	215	23.417	10.9312
	Sequence	# PSMs	# Proteins	# Protein Groups	Protein Group Accessions	Modifications	MH+ [Da]	A2	IonScore A2	Exp Value A2	A4	XCorr A4	# Missed Cleavages
	ALVDGPCTQVR	2	1	1	78000181;P50914	C7(Carbamidomethyl)	1215.61				High	3.03271	0
	LVAIVDVIDQNR	2	1	1	78000181;P50914		1354.77				High	2.99193	0
Q07020	60S ribosomal protein L18 OS=Homo sapiens GN=RPL18 PE=1 SV=2 - [RL18_HUMAN]	13.83	1	2	2	2		0			4.52659	13.83	2	2	188	21.6211	11.7222
	Sequence	# PSMs	# Proteins	# Protein Groups	Protein Group Accessions	Modifications	MH+ [Da]	A2	IonScore A2	Exp Value A2	A4	XCorr A4	# Missed Cleavages
	TAVVVGTITDDVR	1	1	1	4506607;Q07020		1345.74				Medium	2.37505	0
	ILTFDQLALDSPK	1	1	1	4506607;Q07020		1460.8				Low	2.15154	0
P35268	60S ribosomal protein L22 OS=Homo sapiens GN=RPL22 PE=1 SV=2 - [RL22_HUMAN]	30.47	1	1	2	2		0			6.37077	30.47	2	2	128	14.7778	9.18799
	Sequence	# PSMs	# Proteins	# Protein Groups	Protein Group Accessions	Modifications	MH+ [Da]	A2	IonScore A2	Exp Value A2	A4	XCorr A4	# Missed Cleavages
	FTLDCTHPVEDGIMDAANFEQFLQER	1	1	1	4506613;P35268	C5(Carbamidomethyl)	3083.39				High	4.13282	0
	AGNLGGGVVTIER	1	1	1	4506613;P35268		1242.68				Low	2.23795	0
P39023	60S ribosomal protein L3 OS=Homo sapiens GN=RPL3 PE=1 SV=2 - [RL3_HUMAN]	11.66	1	3	3	6		0			21.1451	11.66	3	6	403	46.0798	10.1841
	Sequence	# PSMs	# Proteins	# Protein Groups	Protein Group Accessions	Modifications	MH+ [Da]	A2	IonScore A2	Exp Value A2	A4	XCorr A4	# Missed Cleavages
	ERLEQQVPVNQVFGQDEMIDVIGVTK	2	1	1	4506649;P39023		2971.52				High	5.28807	1
	HGSLGFLPR	2	1	1	4506649;P39023		983.544				High	2.95345	0
	NNASTDYDLSDK	2	1	1	4506649;P39023		1342.58				High	2.75305	0
P36578	60S ribosomal protein L4 OS=Homo sapiens GN=RPL4 PE=1 SV=5 - [RL4_HUMAN]	20.37	1	3	6	6		0			15.2615	20.37	6	6	427	47.6674	11.063
	Sequence	# PSMs	# Proteins	# Protein Groups	Protein Group Accessions	Modifications	MH+ [Da]	A2	IonScore A2	Exp Value A2	A4	XCorr A4	# Missed Cleavages
	APIRPDIVNFVHTNLR	1	1	1	16579885;P36578		1862.04				High	3.12015	0
	QPYAVSELAGHQTSAESWGTGR	1	1	1	16579885;P36578		2332.1				High	3.07697	0
	IEEVPELPLVVEDKVEGYKK	1	1	1	16579885;P36578		2313.26				Low	2.71274	2
	SGQGAFGNMCR	1	1	1	16579885;P36578	C10(Carbamidomethyl)	1184.49				Low	2.16134	0
	MINTDLSR	1	1	1	16579885;P36578		949.477				Low	2.16032	0
	KLDELYGTWR	1	1	1	16579885;P36578		1280.66				Low	2.03002	1
P46777	60S ribosomal protein L5 OS=Homo sapiens GN=RPL5 PE=1 SV=3 - [RL5_HUMAN]	17.85	1	4	4	4		0			12.4592	17.85	4	4	297	34.3407	9.71533
	Sequence	# PSMs	# Proteins	# Protein Groups	Protein Group Accessions	Modifications	MH+ [Da]	A2	IonScore A2	Exp Value A2	A4	XCorr A4	# Missed Cleavages
	GAVDGGLSIPHSTK	1	1	1	14591909;P46777		1338.7				High	3.53747	0
	YLMEEDEDAYKK	1	1	1	14591909;P46777	M3(Oxidation)	1549.67				High	3.11734	1
	IEGDMIVCAAYAHELPK	1	1	1	14591909;P46777	C8(Carbamidomethyl)	1916.92				Medium	3.05921	0
	DIICQIAYAR	1	1	1	14591909;P46777	C4(Carbamidomethyl)	1222.62				High	2.74514	0
Q02878	60S ribosomal protein L6 OS=Homo sapiens GN=RPL6 PE=1 SV=3 - [RL6_HUMAN]	12.15	1	1	2	2		0			5.10906	12.15	2	2	288	32.7076	10.5796
	Sequence	# PSMs	# Proteins	# Protein Groups	Protein Group Accessions	Modifications	MH+ [Da]	A2	IonScore A2	Exp Value A2	A4	XCorr A4	# Missed Cleavages
	HQEGEIFDTEKEKYEITEQR	1	1	1	16753227;Q02878		2509.18				Low	2.89078	2
	ASITPGTILIILTGR	1	1	1	16753227;Q02878		1525.93				Low	2.21828	0
P62424	60S ribosomal protein L7a OS=Homo sapiens GN=RPL7A PE=1 SV=2 - [RL7A_HUMAN]	15.04	1	3	3	8		0			22.4791	15.04	3	8	266	29.977	10.6089
	Sequence	# PSMs	# Proteins	# Protein Groups	Protein Group Accessions	Modifications	MH+ [Da]	A2	IonScore A2	Exp Value A2	A4	XCorr A4	# Missed Cleavages
	LKVPPAINQFTQALDR	2	1	1	4506661;P62424		1811.02				High	3.70173	1
	AGVNTVTTLVENK	4	1	1	4506661;P62424		1345.73				High	3.10364	0
	NFGIGQDIQPK	2	1	1	4506661;P62424		1216.63				Medium	2.36693	0
P18124	60S ribosomal protein L7 OS=Homo sapiens GN=RPL7 PE=1 SV=1 - [RL7_HUMAN]	12.1	1	2	2	4		0			12.3364	12.1	2	4	248	29.2072	10.6528
	Sequence	# PSMs	# Proteins	# Protein Groups	Protein Group Accessions	Modifications	MH+ [Da]	A2	IonScore A2	Exp Value A2	A4	XCorr A4	# Missed Cleavages
	TTHFVEGGDAGNREDQINR	2	1	1	15431301;P18124		2115.98				High	3.77132	1
	IALTDNALIAR	2	1	1	15431301;P18124		1170.69				High	2.65268	0
P05388	60S acidic ribosomal protein P0 OS=Homo sapiens GN=RPLP0 PE=1 SV=1 - [RLA0_HUMAN]	24.61	1	5	6	10		0			27.8285	24.61	6	10	317	34.2518	5.97314
	Sequence	# PSMs	# Proteins	# Protein Groups	Protein Group Accessions	Modifications	MH+ [Da]	A2	IonScore A2	Exp Value A2	A4	XCorr A4	# Missed Cleavages
	AGAIAPCEVTVPAQNTGLGPEK	2	1	1	4506667;P05388	C7(Carbamidomethyl)	2180.1				High	4.03299	0
	IIQLLDDYPK	2	1	1	4506667;P05388		1217.68				High	3.00817	0
	TSFFQALGITTK	2	1	1	4506667;P05388		1313.71				High	2.87754	0
	GTIEILSDVQLIK	2	1	1	4506667;P05388		1428.83				High	2.84728	0
	CFIVGADNVGSK	1	1	1	4506667;P05388	C1(Carbamidomethyl)	1266.61				Medium	2.54727	0
	GNVGFVFTK	1	1	1	4506667;P05388		968.52				Low	2.1213	0
P05387	60S acidic ribosomal protein P2 OS=Homo sapiens GN=RPLP2 PE=1 SV=1 - [RLA2_HUMAN]	25.22	1	0	3	8		0			9.3298	25.22	2	3	115	11.6578	4.53857
	Sequence	# PSMs	# Proteins	# Protein Groups	Protein Group Accessions	Modifications	MH+ [Da]	A2	IonScore A2	Exp Value A2	A4	XCorr A4	# Missed Cleavages
	NIEDVIAQGIGK	4	2	2	4506671;P05387;268612104		1256.68	High	73.77	5.995e-05	High	3.07854	0
	KILDSVGIEADDDRLNK	2	2	2	4506671;P05387;268612104		1901	Low	27.5	2.91878	High	3.43891	2
	ILDSVGIEADDDRLNK	2	2	2	268612104;4506671;P05387		1772.9	Low	22.8	8.02378			1
P09651	Heterogeneous nuclear ribonucleoprotein A1 OS=Homo sapiens GN=HNRNPA1 PE=1 SV=5 - [ROA1_HUMAN]	16.67	1	4	4	5		0			16.7826	16.67	4	5	372	38.7231	9.12939
	Sequence	# PSMs	# Proteins	# Protein Groups	Protein Group Accessions	Modifications	MH+ [Da]	A2	IonScore A2	Exp Value A2	A4	XCorr A4	# Missed Cleavages
	GFAFVTFDDHDSVDKIVIQK	1	1	1	14043070;P09651		2281.15				High	3.69644	1
	SSGPYGGGGQYFAKPR	2	1	1	14043070;P09651		1628.78				High	3.62994	0
	LFIGGLSFETTDESLR	1	1	1	14043070;P09651		1784.91				High	3.57857	0
	IEVIEIMTDR	1	1	1	14043070;P09651		1218.64				Medium	2.45222	0
P22626	Heterogeneous nuclear ribonucleoproteins A2/B1 OS=Homo sapiens GN=HNRNPA2B1 PE=1 SV=2 - [ROA2_HUMAN]	14.16	1	3	4	6		0			16.4026	14.16	4	6	353	37.4067	8.95361
	Sequence	# PSMs	# Proteins	# Protein Groups	Protein Group Accessions	Modifications	MH+ [Da]	A2	IonScore A2	Exp Value A2	A4	XCorr A4	# Missed Cleavages
	LFIGGLSFETTEESLR	2	1	1	14043072;P22626		1798.92				High	3.81394	0
	GGGGNFGPGPGSNFR	2	1	1	14043072;P22626		1377.63				Medium	2.38989	0
	GGNFGFGDSR	1	1	1	14043072;P22626		1013.44				Low	2.2516	0
	TLETVPLER	1	1	1	14043072;P22626		1057.59				Low	2.16851	0
P62847	40S ribosomal protein S24 OS=Homo sapiens GN=RPS24 PE=1 SV=1 - [RS24_HUMAN]	20.3	1	2	2	3		0			7.31631	20.3	2	3	133	15.4134	10.7847
	Sequence	# PSMs	# Proteins	# Protein Groups	Protein Group Accessions	Modifications	MH+ [Da]	A2	IonScore A2	Exp Value A2	A4	XCorr A4	# Missed Cleavages
	TTGFGMIYDSLDYAK	1	1	1	4506703;P62847		1681.78				High	2.75431	0
	TTPDVIFVFGFR	2	1	1	4506703;P62847		1398.74				Medium	2.38171	0
P15880	40S ribosomal protein S2 OS=Homo sapiens GN=RPS2 PE=1 SV=2 - [RS2_HUMAN]	15.36	1	3	4	5		0			13.3077	15.36	4	5	293	31.3046	10.2427
	Sequence	# PSMs	# Proteins	# Protein Groups	Protein Group Accessions	Modifications	MH+ [Da]	A2	IonScore A2	Exp Value A2	A4	XCorr A4	# Missed Cleavages
	SPYQEFTDHLVK	2	1	1	15055539;P15880		1463.72				High	3.3255	0
	TYSYLTPDLWK	1	1	1	15055539;P15880		1386.7				High	2.99179	0
	GTGIVSAPVPK	1	1	1	15055539;P15880		1025.6				Low	2.22439	0
	GCTATLGNFAK	1	1	1	15055539;P15880	C2(Carbamidomethyl)	1139.55				Low	2.1899	0
P62753	40S ribosomal protein S6 OS=Homo sapiens GN=RPS6 PE=1 SV=1 - [RS6_HUMAN]	15.66	1	3	3	5		0			13.9962	15.66	3	5	249	28.663	10.8433
	Sequence	# PSMs	# Proteins	# Protein Groups	Protein Group Accessions	Modifications	MH+ [Da]	A2	IonScore A2	Exp Value A2	A4	XCorr A4	# Missed Cleavages
	KGEKDIPGLTDTTVPR	1	1	1	6677809;P62753		1726.93				High	4.03218	2
	MATEVAADALGEEWK	2	1	1	6677809;P62753		1620.76				High	3.01001	0
	LIEVDDER	2	1	1	6677809;P62753		988.494				Low	2.10115	0
P08865	40S ribosomal protein SA OS=Homo sapiens GN=RPSA PE=1 SV=4 - [RSSA_HUMAN]	16.61	1	0	4	14		0			17.9089	16.61	4	6	295	32.8334	4.86865
	Sequence	# PSMs	# Proteins	# Protein Groups	Protein Group Accessions	Modifications	MH+ [Da]	A2	IonScore A2	Exp Value A2	A4	XCorr A4	# Missed Cleavages
	AIVAIENPADVSVISSR	4	2	2	9845502;P08865;161761214		1740.95	High	99.06	1.54902e-07	High	4.10521	0
	FAAATGATPIAGR	4	2	2	9845502;P08865;161761214		1203.65	High	75.73	5.28707e-05	High	3.35908	0
	LLVVTDPR	3	2	2	161761214;9845502;P08865		912.552	Medium	40.89	0.0307144	Low	2.14152	0
	YVDIAIPCNNK	3	2	2	9845502;P08865;161761214	C8(Carbamidomethyl)	1306.65	Low	28.82	1.50431	Low	2.22876	0
Q15019	Septin-2 OS=Homo sapiens GN=SEPT2 PE=1 SV=1 - [SEPT2_HUMAN]	7.76	1	0	2	4		0			4.74027	7.76	2	2	361	41.4613	6.59521
	Sequence	# PSMs	# Proteins	# Protein Groups	Protein Group Accessions	Modifications	MH+ [Da]	A2	IonScore A2	Exp Value A2	A4	XCorr A4	# Missed Cleavages
	TIISYIDEQFER	2	3	3	4758158;Q15019;1040689;157836014		1513.75	Low	36.47	0.289185	Medium	2.34318	0
	STLINSLFLTDLYPER	2	3	3	4758158;Q15019;1040689;157836014		1882	Low	23.08	6.98499	Medium	2.39709	0
O43175	D-3-phosphoglycerate dehydrogenase OS=Homo sapiens GN=PHGDH PE=1 SV=4 - [SERA_HUMAN]	24.58	1	8	9	19		0			64.6387	24.58	9	19	533	56.6144	6.7124
	Sequence	# PSMs	# Proteins	# Protein Groups	Protein Group Accessions	Modifications	MH+ [Da]	A2	IonScore A2	Exp Value A2	A4	XCorr A4	# Missed Cleavages
	TQTSDPAMLPTMIGLLAEAGVR	6	1	1	23308577;O43175		2272.16				High	4.86228	0
	NAGNCLSPAVIVGLLK	1	1	1	23308577;O43175	C5(Carbamidomethyl)	1625.91				High	3.8863	0
	ILQDGGLQVVEK	2	1	1	23308577;O43175		1298.73				High	3.27601	0
	ALQSGQCAGAALDVFTEEPPRDR	2	1	1	23308577;O43175	C7(Carbamidomethyl)	2488.19				High	3.10724	1
	GTIQVITQGTSLK	2	1	1	23308577;O43175		1345.77				High	2.98489	0
	AGTGVDNVDLEAATR	2	1	1	23308577;O43175		1488.73				High	2.93655	0
	VTADVINAAEK	1	1	1	23308577;O43175		1130.6				Medium	2.57218	0
	TLGILGLGR	2	1	1	23308577;O43175		899.567				Medium	2.38578	0
	QADVNLVNAK	1	1	1	23308577;O43175		1071.58				Low	2.28313	0
P14868	Aspartate--tRNA ligase, cytoplasmic OS=Homo sapiens GN=DARS PE=1 SV=2 - [SYDC_HUMAN]	5.99	1	1	2	2		0			5.53915	5.99	2	2	501	57.1	6.55127
	Sequence	# PSMs	# Proteins	# Protein Groups	Protein Group Accessions	Modifications	MH+ [Da]	A2	IonScore A2	Exp Value A2	A4	XCorr A4	# Missed Cleavages
	LPLQLDDAVRPEAEGEEEGR	1	1	1	45439306;P14868		2223.09				High	3.37395	0
	FQTEIQTVNK	1	1	1	45439306;P14868		1207.63				Low	2.1652	0
P17987	T-complex protein 1 subunit alpha OS=Homo sapiens GN=TCP1 PE=1 SV=1 - [TCPA_HUMAN]	30.04	1	7	9	15		0			59.071	30.04	9	15	556	60.3056	6.11279
	Sequence	# PSMs	# Proteins	# Protein Groups	Protein Group Accessions	Modifications	MH+ [Da]	A2	IonScore A2	Exp Value A2	A4	XCorr A4	# Missed Cleavages
	ASGATILSTLANLEGEETFEAAMLGQAEEVVQER	3	1	1	57863257;P17987		3564.73				High	5.44812	0
	MLVDDIGDVTITNDGATILK	1	1	1	57863257;P17987		2104.09				High	5.40395	0
	ASGATILSTLANLEGEETFEAAMLGQAEEVVQER	1	1	1	57863257;P17987	M23(Oxidation)	3580.74				High	5.28886	0
	YINENLIVNTDELGR	1	1	1	57863257;P17987		1762.9				High	4.54198	0
	SLLVIPNTLAVNAAQDSTDLVAK	3	1	1	57863257;P17987		2353.3				High	4.38779	0
	VLCELADLQDKEVGDGTTSVVIIAAELLK	2	1	1	57863257;P17987	C3(Carbamidomethyl)	3099.65				High	4.36344	1
	SQNVMAAASIANIVK	1	1	1	57863257;P17987		1516.82				High	2.74233	0
	EQLAIAEFAR	1	1	1	57863257;P17987		1147.61				Low	2.17565	0
	QAGVFEPTIVK	1	1	1	57863257;P17987		1188.66				Low	2.03367	0
	YPVNSVNILK	1	1	1	57863257;P17987		1146.65				Low	2.02456	0
P78371	T-complex protein 1 subunit beta OS=Homo sapiens GN=CCT2 PE=1 SV=4 - [TCPB_HUMAN]	31.4	1	9	9	19		0			73.0581	31.4	9	19	535	57.4521	6.45557
	Sequence	# PSMs	# Proteins	# Protein Groups	Protein Group Accessions	Modifications	MH+ [Da]	A2	IonScore A2	Exp Value A2	A4	XCorr A4	# Missed Cleavages
	MLPTIIADNAGYDSADLVAQLR	4	1	1	5453603;P78371		2347.2				High	5.04291	0
	EGTIGDMAILGITESFQVK	2	1	1	5453603;P78371		2009.03				High	5.03466	0
	VQDDEVGDGTTSVTVLAAELLR	3	1	1	5453603;P78371		2288.17				High	4.9718	0
	LGGSLADSYLDEGFLLDKK	2	1	1	5453603;P78371		2041.05				High	4.65092	1
	QLIYNYPEQLFGAAGVMAIEHADFAGVER	1	1	1	5453603;P78371		3209.58				High	4.00162	0
	GATQQILDEAER	2	1	1	5453603;P78371		1330.66				High	3.28178	0
	LTSFIGAIAIGDLVK	2	1	1	5453603;P78371		1517.9				High	3.27644	0
	QVLLSAAEAAEVILR	2	1	1	5453603;P78371		1582.92				High	3.13747	0
	DASLMVTNDGATILK	1	1	1	5453603;P78371		1548.79				Medium	2.48722	0
P50991	T-complex protein 1 subunit delta OS=Homo sapiens GN=CCT4 PE=1 SV=4 - [TCPD_HUMAN]	9.83	1	4	4	7		0			19.6961	9.83	4	7	539	57.8878	7.82568
	Sequence	# PSMs	# Proteins	# Protein Groups	Protein Group Accessions	Modifications	MH+ [Da]	A2	IonScore A2	Exp Value A2	A4	XCorr A4	# Missed Cleavages
	DALSDLALHFLNK	2	1	1	38455427;P50991		1456.78				High	3.89637	0
	ALIAGGGAPEIELALR	2	1	1	38455427;P50991		1550.89				High	3.35193	0
	TLSGMESYCVR	1	1	1	38455427;P50991	C9(Carbamidomethyl)	1302.58				Medium	2.44176	0
	VIDPATATSVDLR	2	1	1	38455427;P50991		1357.73				Low	2.32305	0
P48643	T-complex protein 1 subunit epsilon OS=Homo sapiens GN=CCT5 PE=1 SV=1 - [TCPE_HUMAN]	18.67	1	5	5	8		0			27.72	18.67	5	8	541	59.6328	5.65576
	Sequence	# PSMs	# Proteins	# Protein Groups	Protein Group Accessions	Modifications	MH+ [Da]	A2	IonScore A2	Exp Value A2	A4	XCorr A4	# Missed Cleavages
	ETGANLAICQWGFDDEANHLLLQNNLPAVR	2	1	1	24307939;P48643	C9(Carbamidomethyl)	3379.65				High	4.47013	0
	WVGGPEIELIAIATGGR	2	1	1	24307939;P48643		1738.95				High	4.29708	0
	VAIEHLDKISDSVLVDIKDTEPLIQTAK	1	1	1	24307939;P48643		3090.7				High	3.65987	2
	LGFAGLVQEISFGTTK	1	1	1	24307939;P48643		1667.9				High	3.53786	0
	IADGYEQAAR	2	1	1	24307939;P48643		1093.53				High	2.61091	0
P49368	T-complex protein 1 subunit gamma OS=Homo sapiens GN=CCT3 PE=1 SV=4 - [TCPG_HUMAN]	24.22	1	6	8	9		0			23.2924	24.22	8	9	545	60.4953	6.49365
	Sequence	# PSMs	# Proteins	# Protein Groups	Protein Group Accessions	Modifications	MH+ [Da]	A2	IonScore A2	Exp Value A2	A4	XCorr A4	# Missed Cleavages
	WSSLACNIALDAVK	1	1	1	63162572;P49368	C6(Carbamidomethyl)	1547.79				High	3.31893	0
	NVLLDPQLVPGGGASEMAVAHALTEK	1	1	1	63162572;P49368		2617.36				High	3.2163	0
	IVSRPEELREDDVGTGAGLLEIK	1	1	1	63162572;P49368		2496.33				Low	2.75034	1
	TLIQNCGASTIR	1	1	1	63162572;P49368	C6(Carbamidomethyl)	1333.69				High	2.74459	0
	TAVETAVLLLR	2	1	1	63162572;P49368		1185.72				Medium	2.5788	0
	AVAQALEVIPR	1	1	1	63162572;P49368		1166.69				Medium	2.36137	0
	ELGIWEPLAVK	1	1	1	63162572;P49368		1254.71				Low	2.11788	0
	ISIPVDISDSDMMLNIINSSITTK	1	1	1	63162572;P49368		2607.33				Low	2.01797	0
Q99832	T-complex protein 1 subunit eta OS=Homo sapiens GN=CCT7 PE=1 SV=2 - [TCPH_HUMAN]	16.39	1	6	6	17		0			60.0127	16.39	6	17	543	59.3289	7.6499
	Sequence	# PSMs	# Proteins	# Protein Groups	Protein Group Accessions	Modifications	MH+ [Da]	A2	IonScore A2	Exp Value A2	A4	XCorr A4	# Missed Cleavages
	INALTAASEAACLIVSVDETIKNPR	4	1	1	5453607;Q99832	C12(Carbamidomethyl)	2656.4				High	4.75798	1
	SQDAEVGDGTTSVTLLAAEFLK	3	1	1	5453607;Q99832		2252.13				High	4.67046	0
	INALTAASEAACLIVSVDETIK	2	1	1	5453607;Q99832	C12(Carbamidomethyl)	2289.2				High	4.43809	0
	MVVDAVMMLDDLLQLK	4	1	1	5453607;Q99832		1833.95				High	4.10285	0
	MVVDAVMMLDDLLQLK	1	1	1	5453607;Q99832	M1(Oxidation)	1849.95				High	3.70882	0
	GGAEQFMEETER	2	1	1	5453607;Q99832		1383.58				High	2.63391	0
	LPIGDVATQYFADR	1	1	1	5453607;Q99832		1565.8				Medium	2.55774	0
P50990	T-complex protein 1 subunit theta OS=Homo sapiens GN=CCT8 PE=1 SV=4 - [TCPQ_HUMAN]	15.15	1	7	7	12		0			33.9672	15.15	7	12	548	59.5825	5.60498
	Sequence	# PSMs	# Proteins	# Protein Groups	Protein Group Accessions	Modifications	MH+ [Da]	A2	IonScore A2	Exp Value A2	A4	XCorr A4	# Missed Cleavages
	DMLEAGILDTYLGK	1	1	1	48762932;P50990		1538.78				High	3.6958	0
	AIADTGANVVVTGGK	2	1	1	48762932;P50990		1372.74				High	3.63549	0
	LFVTNDAATILR	2	1	1	48762932;P50990		1333.75				High	2.94647	0
	LATNAAVTVLR	2	1	1	48762932;P50990		1128.67				High	2.79939	0
	APGFAQMLK	2	1	1	48762932;P50990		962.511				High	2.78343	0
	FAEAFEAIPR	2	1	1	48762932;P50990		1150.59				Medium	2.5654	0
	GSTDNLMDDIER	1	1	1	48762932;P50990		1365.59				Low	2.09189	0
P40227	T-complex protein 1 subunit zeta OS=Homo sapiens GN=CCT6A PE=1 SV=3 - [TCPZ_HUMAN]	28.06	1	9	9	20		0			68.3799	28.06	9	20	531	57.9876	6.68311
	Sequence	# PSMs	# Proteins	# Protein Groups	Protein Group Accessions	Modifications	MH+ [Da]	A2	IonScore A2	Exp Value A2	A4	XCorr A4	# Missed Cleavages
	DGNVLLHEMQIQHPTASLIAK	2	1	1	4502643;P40227		2315.22				High	4.25943	0
	VLAQNSGFDLQETLVK	2	1	1	4502643;P40227		1761.94				High	4.22318	0
	AQLGVQAFADALLIIPK	2	1	1	4502643;P40227		1768.04				High	4.07964	0
	NAIDDGCVVPGAGAVEVAMAEALIK	5	1	1	4502643;P40227	C7(Carbamidomethyl)	2470.23				High	4.00229	0
	VATAQDDITGDGTTSNVLIIGELLK	3	1	1	4502643;P40227		2544.34				High	3.97636	0
	VHAELADVLTEAVVDSILAIK	3	1	1	4502643;P40227		2206.24				High	3.81897	0
	TKVHAELADVLTEAVVDSILAIK	1	1	1	4502643;P40227		2435.38				High	3.08646	1
	MLVSGAGDIK	1	1	1	4502643;P40227		990.528				Medium	2.35191	0
	GIDPFSLDALSK	1	1	1	4502643;P40227		1262.66				Low	2.12135	0
Q86V81	THO complex subunit 4 OS=Homo sapiens GN=ALYREF PE=1 SV=3 - [THOC4_HUMAN]	11.28	1	2	2	3		0			10.2532	11.28	2	3	257	26.8716	11.1509
	Sequence	# PSMs	# Proteins	# Protein Groups	Protein Group Accessions	Modifications	MH+ [Da]	A2	IonScore A2	Exp Value A2	A4	XCorr A4	# Missed Cleavages
	QQLSAEELDAQLDAYNAR	2	1	1	48429165;Q86V81		2034.97				High	4.86491	0
	SLGTADVHFER	1	1	1	48429165;Q86V81		1231.61				Medium	2.39404	0
P08670	Vimentin OS=Homo sapiens GN=VIM PE=1 SV=4 - [VIME_HUMAN]	10.09	1	3	3	5		0			17.3105	10.09	3	5	466	53.6191	5.12256
	Sequence	# PSMs	# Proteins	# Protein Groups	Protein Group Accessions	Modifications	MH+ [Da]	A2	IonScore A2	Exp Value A2	A4	XCorr A4	# Missed Cleavages
	LLQDSVDFSLADAINTEFK	2	1	1	62414289;P08670		2126.07				High	4.32403	0
	KVESLQEEIAFLKK	1	1	1	62414289;P08670		1661.95				High	3.31399	2
	SLYASSPGGVYATR	2	1	1	62414289;P08670		1428.72				High	3.05441	0
P13010	X-ray repair cross-complementing protein 5 OS=Homo sapiens GN=XRCC5 PE=1 SV=3 - [XRCC5_HUMAN]	15.3	1	5	5	6		0			20.8622	15.3	5	6	732	82.6523	5.80811
	Sequence	# PSMs	# Proteins	# Protein Groups	Protein Group Accessions	Modifications	MH+ [Da]	A2	IonScore A2	Exp Value A2	A4	XCorr A4	# Missed Cleavages
	YAPTEAQLNAVDALIDSMSLAK	1	1	1	10863945;P13010		2321.17				High	4.72166	0
	DDEAAAVALSSLIHALDDLDMVAIVR	1	1	1	10863945;P13010	M21(Oxidation)	2739.39				High	3.8444	0
	HLMLPDFDLLEDIESK	2	1	1	10863945;P13010		1914.95				High	3.50011	0
	ETVYCLNDDDETEVLKEDIIQGFR	1	1	1	10863945;P13010	C5(Carbamidomethyl)	2901.35				High	3.36962	1
	DKPSGDTAAVFEEGGDVDDLLDMI	1	1	1	10863945;P13010		2509.13				Medium	2.53038	0
P12956	X-ray repair cross-complementing protein 6 OS=Homo sapiens GN=XRCC6 PE=1 SV=2 - [XRCC6_HUMAN]	26.11	1	10	11	30		0			107.124	26.11	11	30	609	69.7991	6.63916
	Sequence	# PSMs	# Proteins	# Protein Groups	Protein Group Accessions	Modifications	MH+ [Da]	A2	IonScore A2	Exp Value A2	A4	XCorr A4	# Missed Cleavages
	NLEALALDLMEPEQAVDLTLPK	4	1	1	4503841;P12956	M10(Oxidation)	2439.27				High	5.44395	0
	NLEALALDLMEPEQAVDLTLPK	10	1	1	4503841;P12956		2423.27				High	4.71759	0
	LGSLVDEFKELVYPPDYNPEGK	1	1	1	4503841;P12956		2509.25				High	3.49066	1
	QIILEKEETEELKR	2	1	1	4503841;P12956		1757.96				High	3.48227	2
	IISSDRDLLAVVFYGTEK	1	1	1	4503841;P12956		2026.09				High	3.4516	1
	NIYVLQELDNPGAK	1	1	1	4503841;P12956		1573.82				High	3.38081	0
	SDSFENPVLQQHFR	2	1	1	4503841;P12956		1703.81				High	3.28294	0
	DSLIFLVDASK	2	1	1	4503841;P12956		1207.66				High	3.26159	0
	DTGIFLDLMHLK	2	1	1	4503841;P12956		1402.74				High	3.22617	0
	DIISIAEDEDLR	1	1	1	4503841;P12956		1388.69				High	2.64461	0
	KQELLEALTK	2	1	1	4503841;P12956		1172.69				Medium	2.57945	1
	IMATPEQVGK	2	1	1	4503841;P12956		1073.57				Low	2.28761	0
P60174	Triosephosphate isomerase OS=Homo sapiens GN=TPI1 PE=1 SV=3 - [TPIS_HUMAN]	24.48	1	0	5	16		0			25.5817	24.48	5	8	286	30.7717	5.92236
	Sequence	# PSMs	# Proteins	# Protein Groups	Protein Group Accessions	Modifications	MH+ [Da]	A2	IonScore A2	Exp Value A2	A4	XCorr A4	# Missed Cleavages
	SNVSDAVAQSTR	4	4	4	226529917;P60174;999892;66360365;190613420		1234.6	High	80.42	1.04758e-05	High	3.33416	0
	IIYGGSVTGATCK	2	4	4	226529917;P60174;999892;66360365;190613420	C12(Carbamidomethyl)	1326.67	High	67.1	0.000246938	High	2.88214	0
	VPADTEVVCAPPTAYIDFAR	2	4	4	226529917;P60174;999892;66360365;190613420	C9(Carbamidomethyl)	2192.07	High	62.26	0.000764676	High	4.86231	0
	VVLAYEPVWAIGTGK	4	4	4	999892;66360365;190613420;226529917;P60174		1602.89	High	61.73	0.000842744	High	3.18025	0
	IAVAAQNCYK	4	4	4	226529917;P60174;999892;66360365;190613420	C8(Carbamidomethyl)	1137.57	Low	41.19	0.100549	High	2.62461	0
P0CG48	Polyubiquitin-C OS=Homo sapiens GN=UBC PE=1 SV=3 - [UBC_HUMAN]	32.85	1	2	2	5		0			14.1742	32.85	2	5	685	76.9915	7.66455
	Sequence	# PSMs	# Proteins	# Protein Groups	Protein Group Accessions	Modifications	MH+ [Da]	A2	IonScore A2	Exp Value A2	A4	XCorr A4	# Missed Cleavages
	TITLEVEPSDTIENVK	3	1	1	391358178;P0CG48		1787.93				High	3.26576	0
	ESTLHLVLR	2	1	1	391358178;P0CG48		1067.62				Medium	2.53696	0

## Sheet: Sheet2
Accession	Description	ΣCoverage	Σ# Proteins	Σ# Unique Peptides	Σ# Peptides	Σ# PSMs	Score A2	Coverage A2	# Peptides A2	# PSM A2	Score A4	Coverage A4	# Peptides A4	# PSM A4	# AAs	MW [kDa]	calc. pI
	Sequence	# PSMs	# Proteins	# Protein Groups	Protein Group Accessions	Modifications	MH+ [Da]	A2	IonScore A2	Exp Value A2	A4	XCorr A4	# Missed Cleavages
	FNVWDTAGQEK	1	2	2	255311812;255311816		1294.61	Low	31.46	0.525012			0
	NLQYYDISAK	1	2	2	255311812;255311816		1214.6	Low	28.71	1.31538			0
	LVLVGDGGTGK	1	2	2	255311812;255311816		1015.58	Low	27.28	2.41337			0
Q9UHB7	AF4/FMR2 family member 4 OS=Homo sapiens GN=AFF4 PE=1 SV=1 - [AFF4_HUMAN]	12.9	1	8	10	17		0			54.1104	12.9	10	17	1163	127.382	9.30518
	Sequence	# PSMs	# Proteins	# Protein Groups	Protein Group Accessions	Modifications	MH+ [Da]	A2	IonScore A2	Exp Value A2	A4	XCorr A4	# Missed Cleavages
	IPSQPLDASASGDVSCVDEILK	1	1	1	7656879;Q9UHB7	C16(Carbamidomethyl)	2301.13				High	4.86262	0
	LSSEHYSSQSHGNSMTELKPSSK	2	1	1	7656879;Q9UHB7		2521.16				High	3.85682	0
	LSSEHYSSQSHGNSMTELKPSSK	2	1	1	7656879;Q9UHB7	M15(Oxidation)	2537.16				High	3.67288	0
	LKIPSQPLDASASGDVSCVDEILK	1	1	1	7656879;Q9UHB7	C18(Carbamidomethyl)	2542.31				High	3.66735	1
	APSSSSNCPPSAPTLDSSKPR	1	1	1	7656879;Q9UHB7	C8(Carbamidomethyl)	2143.01				High	3.63401	0
	VPFSSGQHSTQSFPPSLMSK	2	1	1	7656879;Q9UHB7		2149.04				High	3.44593	0
	EKAPSSSSNCPPSAPTLDSSKPR	2	1	1	7656879;Q9UHB7	C10(Carbamidomethyl)	2400.14				Medium	3.10712	1
	SNSMLQKPTAYVRPMDGQESMEPK	1	1	1	7656879;Q9UHB7	M4(Oxidation); M15(Oxidation); M21(Oxidation)	2772.27				Low	2.88343	0
	SNSMLQKPTAYVRPMDGQESMEPK	1	1	1	7656879;Q9UHB7	M15(Oxidation); M21(Oxidation)	2756.27				Low	2.8177	0
	LVAIPKPTVPPSADEK	1	1	1	7656879;Q9UHB7		1661.95				High	2.76805	0
	DPDANWDSPSR	2	1	1	7656879;Q9UHB7		1259.53				High	2.69581	0
	SNPNFFEQR	1	1	1	7656879;Q9UHB7		1138.53				Low	2.05965	0
P06280	Alpha-galactosidase A OS=Homo sapiens GN=GLA PE=1 SV=1 - [AGAL_HUMAN]	23.08	1	0	4	219		0			369.086	20.51	3	108	429	48.7349	5.60498
	Sequence	# PSMs	# Proteins	# Protein Groups	Protein Group Accessions	Modifications	MH+ [Da]	A2	IonScore A2	Exp Value A2	A4	XCorr A4	# Missed Cleavages
	LFMEMAELMVSEGWK	210	4	4	4504009;P06280;47168708;269914455;295789486		1800.84	High	103.69	3.0032e-08	High	4.73087	0
	QGDNFEVWERPLSGLAWAVAMINR	4	4	4	4504009;P06280;47168708;269914455;295789486		2759.37	Medium	54.98	0.00442888	High	5.99665	0
	TPTMGWLHWER	1	4	4	47168708;269914455;295789486;4504009;P06280		1413.67	Low	29.88	0.871706			0
	IVDVAGPGGWNDPDMLVIGNFGLSWNQQVTQMALWAIMAAPLFMSNDLR	4	4	4	4504009;P06280;47168708;269914455;295789486		5359.62	Low	24.94	1.66165	Medium	3.23942	0
P04075	Fructose-bisphosphate aldolase A OS=Homo sapiens GN=ALDOA PE=1 SV=2 - [ALDOA_HUMAN]	21.98	1	0	7	17		0			15.4003	12.36	3	5	364	39.3953	8.08936
	Sequence	# PSMs	# Proteins	# Protein Groups	Protein Group Accessions	Modifications	MH+ [Da]	A2	IonScore A2	Exp Value A2	A4	XCorr A4	# Missed Cleavages
	GILAADESTGSIAK	4	2	2	4557976;4557305;P04075		1332.7	High	80.12	1.71233e-05	High	3.53785	0
	IGEHTPSALAIMENANVLAR	5	2	2	4557305;P04075;4557976		2107.1	High	56.24	0.00357952	High	3.70385	0
	ALANSLACQGK	3	2	2	4557976;4557305;P04075	C8(Carbamidomethyl)	1132.58	Medium	50.09	0.0165651	Low	2.14022	0
	QLLLTADDR	1	2	2	4557976;4557305;P04075		1044.57	Low	28.42	2.16762			0
	ADDGRPFPQVIK	2	2	2	4557976;4557305;P04075		1342.71	Low	25.45	3.74709			0
	PYQYPALTPEQKK	1	1	1	4557976		1562.82	Low	24	6.3725			1
	GILAADESTGSIAKR	1	2	2	4557976;4557305;P04075		1488.8	Low	19.2	18.9705			1
P09972	Fructose-bisphosphate aldolase C OS=Homo sapiens GN=ALDOC PE=1 SV=2 - [ALDOC_HUMAN]	7.14	1	0	2	5		0			8.06063	7.14	2	2	364	39.4312	6.87354
	Sequence	# PSMs	# Proteins	# Protein Groups	Protein Group Accessions	Modifications	MH+ [Da]	A2	IonScore A2	Exp Value A2	A4	XCorr A4	# Missed Cleavages
	GVVPLAGTDGETTTQGLDGLSER	2	2	2	4885063;P09972;61680382		2273.13	High	102.83	7.30533e-08	High	3.23346	0
	VDKGVVPLAGTDGETTTQGLDGLSER	3	2	2	4885063;P09972;61680382		2615.32	Medium	46.57	0.0320878	High	4.82718	1
O95260	Arginyl-tRNA--protein transferase 1 OS=Homo sapiens GN=ATE1 PE=1 SV=2 - [ATE1_HUMAN]	4.83	1	2	2	3		0			7.76195	4.83	2	3	518	59.0522	7.92822
	Sequence	# PSMs	# Proteins	# Protein Groups	Protein Group Accessions	Modifications	MH+ [Da]	A2	IonScore A2	Exp Value A2	A4	XCorr A4	# Missed Cleavages
	NPPDTPTESQFTR	2	1	1	50345877;O95260		1489.69				High	2.81295	0
	FNQDPEAVDEDR	1	1	1	50345877;O95260		1434.61				Medium	2.3947	0
P06576	ATP synthase subunit beta, mitochondrial OS=Homo sapiens GN=ATP5B PE=1 SV=3 - [ATPB_HUMAN]	8.13	1	2	3	6		0			23.8092	8.13	3	6	529	56.5246	5.40186
	Sequence	# PSMs	# Proteins	# Protein Groups	Protein Group Accessions	Modifications	MH+ [Da]	A2	IonScore A2	Exp Value A2	A4	XCorr A4	# Missed Cleavages
	DQEGQDVLLFIDNIFR	3	1	1	32189394;P06576		1921.97				High	5.31493	0
	TVLIMELINNVAK	2	1	1	32189394;P06576		1457.84				High	3.58384	0
	FTQAGSEVSALLGR	1	1	1	32189394;P06576		1435.75				Medium	2.48965	0
P35520	Cystathionine beta-synthase OS=Homo sapiens GN=CBS PE=1 SV=2 - [CBS_HUMAN]	11.98	1	3	3	5		0			17.6607	11.98	3	5	551	60.5482	6.65381
	Sequence	# PSMs	# Proteins	# Protein Groups	Protein Group Accessions	Modifications	MH+ [Da]	A2	IonScore A2	Exp Value A2	A4	XCorr A4	# Missed Cleavages
	DGTLKPGDTIIEPTSGNTGIGLALAAAVR	1	1	1	4557415;P35520		2808.51				High	5.17387	0
	VQELGLSAPLTVLPTITCGHTIEILR	3	1	1	4557415;P35520	C18(Carbamidomethyl)	2831.57				High	3.6387	0
	SNDEEAFTFAR	1	1	1	4557415;P35520		1286.56				Low	2.22485	0
O60563	Cyclin-T1 OS=Homo sapiens GN=CCNT1 PE=1 SV=1 - [CCNT1_HUMAN]	8.54	1	3	3	3		0			10.8874	8.54	3	3	726	80.6345	8.77783
	Sequence	# PSMs	# Proteins	# Protein Groups	Protein Group Accessions	Modifications	MH+ [Da]	A2	IonScore A2	Exp Value A2	A4	XCorr A4	# Missed Cleavages
	RGPSEETGGAVFDHPAK	1	1	1	17978466;O60563		1754.84				High	3.95787	1
	TSENLALTGVDHSLPQDGSNAFISQK	1	1	1	17978466;O60563		2729.34				High	3.58992	0
	IKVHAAADKHNSVEDSVTK	1	1	1	17978466;O60563		2049.07				Medium	3.33962	2
P50750	Cyclin-dependent kinase 9 OS=Homo sapiens GN=CDK9 PE=1 SV=3 - [CDK9_HUMAN]	26.61	1	8	8	17		0			51.0749	26.61	8	17	372	42.7502	8.79248
	Sequence	# PSMs	# Proteins	# Protein Groups	Protein Group Accessions	Modifications	MH+ [Da]	A2	IonScore A2	Exp Value A2	A4	XCorr A4	# Missed Cleavages
	IDSDDALNHDFFWSDPMPSDLK	2	1	1	4502747;P50750		2565.13				High	3.89846	0
	HENVVNLIEICR	3	1	1	4502747;P50750	C11(Carbamidomethyl)	1495.77				High	3.62396	0
	NPATTNQTEFER	3	1	1	4502747;P50750		1407.65				High	3.48876	0
	DPYALDLIDK	2	1	1	4502747;P50750		1162.6				High	3.08483	0
	VVTLWYRPPELLLGER	1	1	1	4502747;P50750		1941.1				Medium	3.06316	0
	IGQGTFGEVFK	2	1	1	4502747;P50750		1182.62				High	2.66877	0
	LADFGLAR	2	1	1	4502747;P50750		862.479				Medium	2.57806	0
	AANVLITR	2	1	1	4502747;P50750		857.52				Medium	2.44709	0
P10809	60 kDa heat shock protein, mitochondrial OS=Homo sapiens GN=HSPD1 PE=1 SV=2 - [CH60_HUMAN]	16.93	1	6	6	25		0			100.76	16.93	6	25	573	61.0164	5.87158
	Sequence	# PSMs	# Proteins	# Protein Groups	Protein Group Accessions	Modifications	MH+ [Da]	A2	IonScore A2	Exp Value A2	A4	XCorr A4	# Missed Cleavages
	ALMLQGVDLLADAVAVTMGPK	10	1	1	31542947;P10809		2113.14				High	5.32243	0
	ALMLQGVDLLADAVAVTMGPK	6	1	1	31542947;P10809	M18(Oxidation)	2129.14				High	5.08032	0
	GVMLAVDAVIAELKK	1	1	1	31542947;P10809		1556.91				High	4.02529	1
	TALLDAAGVASLLTTAEVVVTEIPKEEK	3	1	1	31542947;P10809		2868.58				High	3.92418	1
	TVIIEQSWGSPK	2	1	1	31542947;P10809		1344.72				High	2.96287	0
	GYISPYFINTSK	1	1	1	31542947;P10809		1389.7				High	2.60858	0
	VGLQVVAVK	2	1	1	31542947;P10809		912.587				Medium	2.57507	0
P35659	Protein DEK OS=Homo sapiens GN=DEK PE=1 SV=1 - [DEK_HUMAN]	21.07	1	6	7	20		0			57.1003	21.07	7	20	375	42.6479	8.55811
	Sequence	# PSMs	# Proteins	# Protein Groups	Protein Group Accessions	Modifications	MH+ [Da]	A2	IonScore A2	Exp Value A2	A4	XCorr A4	# Missed Cleavages
	VYENYPTYDLTER	2	1	1	4503249;P35659		1662.77				High	3.79636	0
	LTMQVSSLQR	2	1	1	4503249;P35659		1162.62				High	3.33695	0
	LLASANLEEVTMK	2	1	1	4503249;P35659	M12(Oxidation)	1434.75				High	3.26464	0
	LLASANLEEVTMK	3	1	1	4503249;P35659		1418.76				High	3.24556	0
	KPPTDEELKETIKK	2	1	1	4503249;P35659		1655.92				Medium	2.98527	2
	NVGQFSGFPFEK	3	1	1	4503249;P35659		1356.66				High	2.81933	0
	LTMQVSSLQR	2	1	1	4503249;P35659	M3(Oxidation)	1178.62				High	2.7805	0
	SICEVLDLER	3	1	1	4503249;P35659	C3(Carbamidomethyl)	1233.61				High	2.65021	0
	IHFFLSK	1	1	1	4503249;P35659		891.51				Low	2.27511	0
Q5VTE0	Putative elongation factor 1-alpha-like 3 OS=Homo sapiens GN=EEF1A1P5 PE=5 SV=1 - [EF1A3_HUMAN]	27.06	1	7	8	25		0			91.0737	27.06	8	25	462	50.1532	9.0708
	Sequence	# PSMs	# Proteins	# Protein Groups	Protein Group Accessions	Modifications	MH+ [Da]	A2	IonScore A2	Exp Value A2	A4	XCorr A4	# Missed Cleavages
	NMITGTSQADCAVLIVAAGVGEFEAGISK	5	1	1	74746925;Q5VTE0	C11(Carbamidomethyl)	2909.44				High	6.15624	0
	NMITGTSQADCAVLIVAAGVGEFEAGISK	4	1	1	74746925;Q5VTE0	M2(Oxidation); C11(Carbamidomethyl)	2925.44				High	5.37583	0
	KDGNASGTTLLEALDCILPPTRPTDKPLR	3	1	1	74746925;Q5VTE0	C16(Carbamidomethyl)	3149.67				High	4.23895	1
	DGNASGTTLLEALDCILPPTRPTDKPLR	4	1	1	74746925;Q5VTE0	C15(Carbamidomethyl)	3021.56				High	4.07945	0
	VETGVLKPGMVVTFAPVNVTTEVK	1	1	1	74746925;Q5VTE0	M10(Oxidation)	2531.38				High	3.21798	0
	YYVTIIDAPGHR	2	1	1	74746925;Q5VTE0		1404.73				High	2.9384	0
	IGGIGTVPVGR	3	1	1	74746925;Q5VTE0		1025.61				High	2.72938	0
	EHALLAYTLGVK	2	1	1	74746925;Q5VTE0		1314.74				Low	2.28299	0
	LPLQDVYK	1	1	1	74746925;Q5VTE0		975.552				Low	2.03567	0
P24534	Elongation factor 1-beta OS=Homo sapiens GN=EEF1B2 PE=1 SV=3 - [EF1B_HUMAN]	12.44	1	2	2	4		0			13.8664	12.44	2	4	225	24.7483	4.66553
	Sequence	# PSMs	# Proteins	# Protein Groups	Protein Group Accessions	Modifications	MH+ [Da]	A2	IonScore A2	Exp Value A2	A4	XCorr A4	# Missed Cleavages
	SPAGLQVLNDYLADK	2	1	1	4503477;P24534		1603.83				High	4.4098	0
	SIQADGLVWGSSK	2	1	1	4503477;P24534		1347.69				High	3.04182	0
P29692	Elongation factor 1-delta OS=Homo sapiens GN=EEF1D PE=1 SV=5 - [EF1D_HUMAN]	17.08	1	0	3	12		0			14.0237	17.08	3	5	281	31.1028	5.0083
	Sequence	# PSMs	# Proteins	# Protein Groups	Protein Group Accessions	Modifications	MH+ [Da]	A2	IonScore A2	Exp Value A2	A4	XCorr A4	# Missed Cleavages
	IASLEVENQSLR	4	2	2	25453472;P29692;38522		1358.73	High	81.39	1.21488e-05	High	3.03812	0
	GVVQELQQAISK	4	2	2	38522;25453472;P29692		1299.73	High	75.96	3.66858e-05	Medium	2.58935	0
	SLAGSSGPGASSGTSGDHGELVVR	4	2	2	25453472;P29692;38522		2185.05	Medium	50.96	0.00852464	High	3.1902	0
P26641	Elongation factor 1-gamma OS=Homo sapiens GN=EEF1G PE=1 SV=3 - [EF1G_HUMAN]	16.02	1	6	6	10		0			27.7489	16.02	6	10	437	50.0871	6.66846
	Sequence	# PSMs	# Proteins	# Protein Groups	Protein Group Accessions	Modifications	MH+ [Da]	A2	IonScore A2	Exp Value A2	A4	XCorr A4	# Missed Cleavages
	KAAAPAPEEEMDECEQALAAEPK	1	1	1	4503481;P26641	C14(Carbamidomethyl)	2485.12				High	3.39934	1
	KLDPGSEETQTLVR	2	1	1	4503481;P26641		1572.82				High	3.13959	1
	ALIAAQYSGAQVR	2	1	1	4503481;P26641		1347.74				High	3.07492	0
	LDPGSEETQTLVR	1	1	1	4503481;P26641		1444.73				High	2.97657	0
	ILGLLDAYLK	2	1	1	4503481;P26641		1118.68				Medium	2.47755	0
	STFVLDEFKR	2	1	1	4503481;P26641		1241.65				Medium	2.33162	1
P06733	Alpha-enolase OS=Homo sapiens GN=ENO1 PE=1 SV=2 - [ENOA_HUMAN]	49.08	1	0	16	65		0			98.1269	39.17	12	27	434	47.1393	7.38623
	Sequence	# PSMs	# Proteins	# Protein Groups	Protein Group Accessions	Modifications	MH+ [Da]	A2	IonScore A2	Exp Value A2	A4	XCorr A4	# Missed Cleavages
	AAVPSGASTGIYEALELR	4	2	2	4503571;P06733;203282367		1804.95	High	119.53	1.90149e-09	High	4.13342	0
	SGETEDTFIADLVVGLCTGQIK	8	2	2	4503571;P06733;203282367	C17(Carbamidomethyl)	2353.16	High	117.31	2.68174e-09	High	4.45564	0
	VNQIGSVTESLQACK	4	2	2	4503571;P06733;203282367	C14(Carbamidomethyl)	1633.82	High	111.54	1.10514e-08	High	3.90377	0
	GNPTVEVDLFTSK	4	2	2	4503571;P06733;203282367		1406.72	High	96.1	4.01959e-07	High	2.97624	0
	SFIKDYPVVSIEDPFDQDDWGAWQK	6	2	2	4503571;P06733;203282367		2985.39	High	85.54	1.94724e-06	High	6.24698	1
	LAMQEFMILPVGAANFR	7	2	2	203282367;4503571;P06733		1907.99	High	77.11	3.38775e-05	High	5.07039	0
	DATNVGDEGGFAPNILENK	4	2	2	4503571;P06733;203282367		1960.93	High	68.59	0.000112712	High	4.66548	0
	DYPVVSIEDPFDQDDWGAWQK	2	2	2	4503571;P06733;203282367		2510.12	High	67.29	5.33691e-05	High	2.86183	0
	YISPDQLADLYK	6	2	2	4503571;P06733;203282367		1425.73	High	62.13	0.000931722	High	3.0843	0
	DATNVGDEGGFAPNILENKEGLELLK	3	2	2	203282367;4503571;P06733		2743.38	High	60.91	0.00115996			1
	IGAEVYHNLK	5	2	2	4503571;P06733;203282367		1143.62	Medium	50.89	0.0119611	High	3.13675	0
	LMIEMDGTENK	4	2	2	4503571;P06733;203282367		1280.59	Medium	47.68	0.00985092	Medium	2.45143	0
	SGKYDLDFK	2	2	2	203282367;4503571;P06733		1072.53	Medium	44.98	0.0248304			1
	AGYTDKVVIGMDVAASEFFR	1	2	2	203282367;4503571;P06733		2176.08	Medium	44.3	0.0528435			1
	SCNCLLLK	4	2	2	4503571;P06733;203282367	C2(Carbamidomethyl); C4(Carbamidomethyl)	1007.5	Low	30.01	1.18372	Medium	2.34677	0
	SGKYDLDFKSPDDPSR	1	2	2	203282367;4503571;P06733		1826.86	Low	10.68	65.1219			2
P35637	RNA-binding protein FUS OS=Homo sapiens GN=FUS PE=1 SV=1 - [FUS_HUMAN]	16.54	1	4	4	7		0			27.4744	16.54	4	7	526	53.3938	9.36377
	Sequence	# PSMs	# Proteins	# Protein Groups	Protein Group Accessions	Modifications	MH+ [Da]	A2	IonScore A2	Exp Value A2	A4	XCorr A4	# Missed Cleavages
	HDSEQDNSDNNTIFVQGLGENVTIESVADYFK	2	1	1	4826734;P35637		3585.63				High	6.29327	0
	APKPDGPGGGPGGSHMGGNYGDDR	2	1	1	4826734;P35637		2252.97				High	3.5131	0
	AAIDWFDGKEFSGNPIK	1	1	1	4826734;P35637		1894.93				High	3.40725	1
	APKPDGPGGGPGGSHMGGNYGDDR	1	1	1	4826734;P35637	M16(Oxidation)	2268.97				Low	2.8611	0
	GEATVSFDDPPSAK	1	1	1	4826734;P35637		1420.66				High	2.67984	0
P04406	Glyceraldehyde-3-phosphate dehydrogenase OS=Homo sapiens GN=GAPDH PE=1 SV=3 - [G3P_HUMAN]	37.01	1	0	8	41		0			77.7552	34.93	7	20	335	36.0304	8.45557
	Sequence	# PSMs	# Proteins	# Protein Groups	Protein Group Accessions	Modifications	MH+ [Da]	A2	IonScore A2	Exp Value A2	A4	XCorr A4	# Missed Cleavages
	WGDAGAEYVVESTGVFTTMEK	2	2	2	7669492;P04406;67464043		2277.04	High	117.04	9.58534e-10	High	5.21112	0
	IISNASCTTNCLAPLAK	4	2	2	7669492;P04406;67464043	C7(Carbamidomethyl); C11(Carbamidomethyl)	1833.92	High	99.5	1.91057e-07	High	4.35874	0
	VPTANVSVVDLTCR	4	2	2	7669492;P04406;67464043	C13(Carbamidomethyl)	1530.8	High	80.57	1.46275e-05	High	3.25326	0
	VIHDNFGIVEGLMTTVHAITATQK	14	2	2	7669492;P04406;67464043		2595.36	High	74.42	4.72525e-05	High	6.74382	0
	LISWYDNEFGYSNR	4	2	2	67464043;7669492;P04406		1763.8	High	72.47	2.72191e-05	High	3.8196	0
	VVDLMAHMASKE	4	2	2	7669492;P04406;67464043		1330.65	High	66.25	0.000256713	High	2.82978	1
	GALQNIIPASTGAAK	8	2	2	7669492;P04406;67464043		1411.79	High	64.52	0.000357439	High	3.12186	0
	LTGMAFR	1	2	2	67464043;7669492;P04406		795.419	Low	27.08	1.85914			0
P38646	Stress-70 protein, mitochondrial OS=Homo sapiens GN=HSPA9 PE=1 SV=2 - [GRP75_HUMAN]	17.82	1	9	9	13		0			35.9508	17.82	9	13	679	73.6348	6.16357
	Sequence	# PSMs	# Proteins	# Protein Groups	Protein Group Accessions	Modifications	MH+ [Da]	A2	IonScore A2	Exp Value A2	A4	XCorr A4	# Missed Cleavages
	MKETAENYLGHTAK	1	1	1	24234688;P38646		1592.77				High	4.0911	1
	AQFEGIVTDLIR	2	1	1	24234688;P38646		1361.74				High	3.295	0
	DAGQISGLNVLR	1	1	1	24234688;P38646		1242.68				High	3.1139	0
	VQQTVQDLFGR	2	1	1	24234688;P38646		1290.68				High	3.01766	0
	NAVITVPAYFNDSQR	1	1	1	24234688;P38646		1694.85				Medium	2.5802	0
	LYSPSQIGAFVLMK	2	1	1	24234688;P38646		1553.84				Medium	2.56287	0
	LLGQFTLIGIPPAPR	1	1	1	24234688;P38646		1592.95				Medium	2.49551	0
	QAVTNPNNTFYATK	1	1	1	24234688;P38646		1568.77				Medium	2.37845	0
	TTPSVVAFTADGER	2	1	1	24234688;P38646		1450.72				Low	2.32397	0
P11021	78 kDa glucose-regulated protein OS=Homo sapiens GN=HSPA5 PE=1 SV=2 - [GRP78_HUMAN]	23.7	1	9	11	25		0			74.7116	23.7	11	25	654	72.2884	5.16064
	Sequence	# PSMs	# Proteins	# Protein Groups	Protein Group Accessions	Modifications	MH+ [Da]	A2	IonScore A2	Exp Value A2	A4	XCorr A4	# Missed Cleavages
	IINEPTAAAIAYGLDK	2	1	1	16507237;P11021		1659.9				High	4.27206	0
	LYGSAGPPPTGEEDTAEKDEL	2	1	1	16507237;P11021		2176				High	4.00248	1
	MKETAEAYLGKK	1	1	1	16507237;P11021		1368.72				High	3.87442	2
	VTHAVVTVPAYFNDAQR	2	1	1	16507237;P11021		1887.97				High	3.35081	0
	ITPSYVAFTPEGER	2	1	1	16507237;P11021		1566.78				High	3.19684	0
	TFAPEEISAMVLTK	2	1	1	16507237;P11021		1536.8				High	3.06723	0
	VEIIANDQGNR	6	2	2	16507237;P11021;167466173;P08107		1228.63				High	3.02372	0
	TWNDPSVQQDIK	2	1	1	16507237;P11021		1430.69				High	2.70404	0
	NQLTSNPENTVFDAK	2	1	1	16507237;P11021		1677.81				High	2.67918	0
	DAGTIAGLNVMR	2	1	1	16507237;P11021		1217.63				Medium	2.5487	0
	NELESYAYSLK	2	1	1	16507237;P11021		1316.64				Low	2.30068	0
P16403	Histone H1.2 OS=Homo sapiens GN=HIST1H1C PE=1 SV=2 - [H12_HUMAN]	15.96	1	0	3	5		0			12.3422	15.96	3	5	213	21.3517	10.9312
	Sequence	# PSMs	# Proteins	# Protein Groups	Protein Group Accessions	Modifications	MH+ [Da]	A2	IonScore A2	Exp Value A2	A4	XCorr A4	# Missed Cleavages
	KASGPPVSELITK	2	3	3	4885375;P16403;4885377;P16402;4885379;P10412		1326.76				High	2.87544	1
	SGVSLAALKK	1	3	3	4885375;P16403;4885377;P16402;4885379;P10412		973.604				Medium	2.47271	1
	ALAAAGYDVEK	2	3	3	4885375;P16403;4885377;P16402;4885379;P10412		1107.57				Medium	2.43945	0
P16402	Histone H1.3 OS=Homo sapiens GN=HIST1H1D PE=1 SV=2 - [H13_HUMAN]	15.38	1	0	3	5		0			12.3422	15.38	3	5	221	22.3363	11.019
	Sequence	# PSMs	# Proteins	# Protein Groups	Protein Group Accessions	Modifications	MH+ [Da]	A2	IonScore A2	Exp Value A2	A4	XCorr A4	# Missed Cleavages
	KASGPPVSELITK	2	3	3	4885375;P16403;4885377;P16402;4885379;P10412		1326.76				High	2.87544	1
	SGVSLAALKK	1	3	3	4885375;P16403;4885377;P16402;4885379;P10412		973.604				Medium	2.47271	1
	ALAAAGYDVEK	2	3	3	4885375;P16403;4885377;P16402;4885379;P10412		1107.57				Medium	2.43945	0
P10412	Histone H1.4 OS=Homo sapiens GN=HIST1H1E PE=1 SV=2 - [H14_HUMAN]	15.53	1	0	3	5		0			12.3422	15.53	3	5	219	21.852	11.0337
	Sequence	# PSMs	# Proteins	# Protein Groups	Protein Group Accessions	Modifications	MH+ [Da]	A2	IonScore A2	Exp Value A2	A4	XCorr A4	# Missed Cleavages
	KASGPPVSELITK	2	3	3	4885375;P16403;4885377;P16402;4885379;P10412		1326.76				High	2.87544	1
	SGVSLAALKK	1	3	3	4885375;P16403;4885377;P16402;4885379;P10412		973.604				Medium	2.47271	1
	ALAAAGYDVEK	2	3	3	4885375;P16403;4885377;P16402;4885379;P10412		1107.57				Medium	2.43945	0
P20671	Histone H2A type 1-D OS=Homo sapiens GN=HIST1H2AD PE=1 SV=2 - [H2A1D_HUMAN]	35.38	1	0	4	57		0			191.537	35.38	4	57	130	14.0989	10.9019
	Sequence	# PSMs	# Proteins	# Protein Groups	Protein Group Accessions	Modifications	MH+ [Da]	A2	IonScore A2	Exp Value A2	A4	XCorr A4	# Missed Cleavages
	VTIAQGGVLPNIQAVLLPK	46	4	4	10800130;P20671;18105045;Q96KK5;10800144;Q99878;4504251;Q6FI13		1931.17				High	4.82202	0
	NDEELNKLLGK	2	4	4	10800130;P20671;18105045;Q96KK5;10800144;Q99878;4504251;Q6FI13		1272.68				High	3.31588	1
	HLQLAIRNDEELNKLLGK	1	4	4	10800130;P20671;18105045;Q96KK5;10800144;Q99878;4504251;Q6FI13		2104.19				Medium	3.02776	2
	AGLQFPVGR	8	4	4	10800130;P20671;18105045;Q96KK5;10800144;Q99878;4504251;Q6FI13		944.531				Medium	2.50652	0
Q96KK5	Histone H2A type 1-H OS=Homo sapiens GN=HIST1H2AH PE=1 SV=3 - [H2A1H_HUMAN]	35.94	1	0	4	57		0			191.537	35.94	4	57	128	13.8978	10.8872
	Sequence	# PSMs	# Proteins	# Protein Groups	Protein Group Accessions	Modifications	MH+ [Da]	A2	IonScore A2	Exp Value A2	A4	XCorr A4	# Missed Cleavages
	VTIAQGGVLPNIQAVLLPK	46	4	4	10800130;P20671;18105045;Q96KK5;10800144;Q99878;4504251;Q6FI13		1931.17				High	4.82202	0
	NDEELNKLLGK	2	4	4	10800130;P20671;18105045;Q96KK5;10800144;Q99878;4504251;Q6FI13		1272.68				High	3.31588	1
	HLQLAIRNDEELNKLLGK	1	4	4	10800130;P20671;18105045;Q96KK5;10800144;Q99878;4504251;Q6FI13		2104.19				Medium	3.02776	2
	AGLQFPVGR	8	4	4	10800130;P20671;18105045;Q96KK5;10800144;Q99878;4504251;Q6FI13		944.531				Medium	2.50652	0
Q99878	Histone H2A type 1-J OS=Homo sapiens GN=HIST1H2AJ PE=1 SV=3 - [H2A1J_HUMAN]	35.94	1	0	4	57		0			191.537	35.94	4	57	128	13.9278	10.8872
	Sequence	# PSMs	# Proteins	# Protein Groups	Protein Group Accessions	Modifications	MH+ [Da]	A2	IonScore A2	Exp Value A2	A4	XCorr A4	# Missed Cleavages
	VTIAQGGVLPNIQAVLLPK	46	4	4	10800130;P20671;18105045;Q96KK5;10800144;Q99878;4504251;Q6FI13		1931.17				High	4.82202	0
	NDEELNKLLGK	2	4	4	10800130;P20671;18105045;Q96KK5;10800144;Q99878;4504251;Q6FI13		1272.68				High	3.31588	1
	HLQLAIRNDEELNKLLGK	1	4	4	10800130;P20671;18105045;Q96KK5;10800144;Q99878;4504251;Q6FI13		2104.19				Medium	3.02776	2
	AGLQFPVGR	8	4	4	10800130;P20671;18105045;Q96KK5;10800144;Q99878;4504251;Q6FI13		944.531				Medium	2.50652	0
Q6FI13	Histone H2A type 2-A OS=Homo sapiens GN=HIST2H2AA3 PE=1 SV=3 - [H2A2A_HUMAN]	35.38	1	0	4	57		0			191.537	35.38	4	57	130	14.0869	10.9019
	Sequence	# PSMs	# Proteins	# Protein Groups	Protein Group Accessions	Modifications	MH+ [Da]	A2	IonScore A2	Exp Value A2	A4	XCorr A4	# Missed Cleavages
	VTIAQGGVLPNIQAVLLPK	46	4	4	10800130;P20671;18105045;Q96KK5;10800144;Q99878;4504251;Q6FI13		1931.17				High	4.82202	0
	NDEELNKLLGK	2	4	4	10800130;P20671;18105045;Q96KK5;10800144;Q99878;4504251;Q6FI13		1272.68				High	3.31588	1
	HLQLAIRNDEELNKLLGK	1	4	4	10800130;P20671;18105045;Q96KK5;10800144;Q99878;4504251;Q6FI13		2104.19				Medium	3.02776	2
	AGLQFPVGR	8	4	4	10800130;P20671;18105045;Q96KK5;10800144;Q99878;4504251;Q6FI13		944.531				Medium	2.50652	0
P62807	Histone H2B type 1-C/E/F/G/I OS=Homo sapiens GN=HIST1H2BC PE=1 SV=4 - [H2B1C_HUMAN]	26.98	1	0	3	47		0			188.042	26.98	3	47	126	13.8976	10.3159
	Sequence	# PSMs	# Proteins	# Protein Groups	Protein Group Accessions	Modifications	MH+ [Da]	A2	IonScore A2	Exp Value A2	A4	XCorr A4	# Missed Cleavages
	AMGIMNSFVNDIFER	32	8	8	4504257;P62807;10800138;P58876;4504269;Q93079;18105048;O60814;4504259;Q99880;4504263;Q99879;4504261;Q99877;9973351;P57053		1743.82				High	4.91838	0
	AMGIMNSFVNDIFER	6	8	8	4504257;P62807;10800138;P58876;4504269;Q93079;18105048;O60814;4504259;Q99880;4504263;Q99879;4504261;Q99877;9973351;P57053	M2(Oxidation)	1759.82				High	4.57464	0
	AMGIMNSFVNDIFER	5	8	8	4504257;P62807;10800138;P58876;4504269;Q93079;18105048;O60814;4504259;Q99880;4504263;Q99879;4504261;Q99877;9973351;P57053	M2(Oxidation); M5(Oxidation)	1775.81				High	4.41491	0
	KESYSVYVYK	3	8	8	4504257;P62807;10800138;P58876;4504269;Q93079;18105048;O60814;4504259;Q99880;4504263;Q99879;4504261;Q99877;9973351;P57053		1265.64				High	2.9665	1
	LLLPGELAK	1	8	8	4504257;P62807;10800138;P58876;4504269;Q93079;18105048;O60814;4504259;Q99880;4504263;Q99879;4504261;Q99877;9973351;P57053		953.602				Low	2.0575	0
P58876	Histone H2B type 1-D OS=Homo sapiens GN=HIST1H2BD PE=1 SV=2 - [H2B1D_HUMAN]	26.98	1	0	3	47		0			188.042	26.98	3	47	126	13.9276	10.3159
	Sequence	# PSMs	# Proteins	# Protein Groups	Protein Group Accessions	Modifications	MH+ [Da]	A2	IonScore A2	Exp Value A2	A4	XCorr A4	# Missed Cleavages
	AMGIMNSFVNDIFER	32	8	8	4504257;P62807;10800138;P58876;4504269;Q93079;18105048;O60814;4504259;Q99880;4504263;Q99879;4504261;Q99877;9973351;P57053		1743.82				High	4.91838	0
	AMGIMNSFVNDIFER	6	8	8	4504257;P62807;10800138;P58876;4504269;Q93079;18105048;O60814;4504259;Q99880;4504263;Q99879;4504261;Q99877;9973351;P57053	M2(Oxidation)	1759.82				High	4.57464	0
	AMGIMNSFVNDIFER	5	8	8	4504257;P62807;10800138;P58876;4504269;Q93079;18105048;O60814;4504259;Q99880;4504263;Q99879;4504261;Q99877;9973351;P57053	M2(Oxidation); M5(Oxidation)	1775.81				High	4.41491	0
	KESYSVYVYK	3	8	8	4504257;P62807;10800138;P58876;4504269;Q93079;18105048;O60814;4504259;Q99880;4504263;Q99879;4504261;Q99877;9973351;P57053		1265.64				High	2.9665	1
	LLLPGELAK	1	8	8	4504257;P62807;10800138;P58876;4504269;Q93079;18105048;O60814;4504259;Q99880;4504263;Q99879;4504261;Q99877;9973351;P57053		953.602				Low	2.0575	0
Q93079	Histone H2B type 1-H OS=Homo sapiens GN=HIST1H2BH PE=1 SV=3 - [H2B1H_HUMAN]	26.98	1	0	3	47		0			188.042	26.98	3	47	126	13.8835	10.3159
	Sequence	# PSMs	# Proteins	# Protein Groups	Protein Group Accessions	Modifications	MH+ [Da]	A2	IonScore A2	Exp Value A2	A4	XCorr A4	# Missed Cleavages
	AMGIMNSFVNDIFER	32	8	8	4504257;P62807;10800138;P58876;4504269;Q93079;18105048;O60814;4504259;Q99880;4504263;Q99879;4504261;Q99877;9973351;P57053		1743.82				High	4.91838	0
	AMGIMNSFVNDIFER	6	8	8	4504257;P62807;10800138;P58876;4504269;Q93079;18105048;O60814;4504259;Q99880;4504263;Q99879;4504261;Q99877;9973351;P57053	M2(Oxidation)	1759.82				High	4.57464	0
	AMGIMNSFVNDIFER	5	8	8	4504257;P62807;10800138;P58876;4504269;Q93079;18105048;O60814;4504259;Q99880;4504263;Q99879;4504261;Q99877;9973351;P57053	M2(Oxidation); M5(Oxidation)	1775.81				High	4.41491	0
	KESYSVYVYK	3	8	8	4504257;P62807;10800138;P58876;4504269;Q93079;18105048;O60814;4504259;Q99880;4504263;Q99879;4504261;Q99877;9973351;P57053		1265.64				High	2.9665	1
	LLLPGELAK	1	8	8	4504257;P62807;10800138;P58876;4504269;Q93079;18105048;O60814;4504259;Q99880;4504263;Q99879;4504261;Q99877;9973351;P57053		953.602				Low	2.0575	0
O60814	Histone H2B type 1-K OS=Homo sapiens GN=HIST1H2BK PE=1 SV=3 - [H2B1K_HUMAN]	26.98	1	0	3	47		0			188.042	26.98	3	47	126	13.8816	10.3159
	Sequence	# PSMs	# Proteins	# Protein Groups	Protein Group Accessions	Modifications	MH+ [Da]	A2	IonScore A2	Exp Value A2	A4	XCorr A4	# Missed Cleavages
	AMGIMNSFVNDIFER	32	8	8	4504257;P62807;10800138;P58876;4504269;Q93079;18105048;O60814;4504259;Q99880;4504263;Q99879;4504261;Q99877;9973351;P57053		1743.82				High	4.91838	0
	AMGIMNSFVNDIFER	6	8	8	4504257;P62807;10800138;P58876;4504269;Q93079;18105048;O60814;4504259;Q99880;4504263;Q99879;4504261;Q99877;9973351;P57053	M2(Oxidation)	1759.82				High	4.57464	0
	AMGIMNSFVNDIFER	5	8	8	4504257;P62807;10800138;P58876;4504269;Q93079;18105048;O60814;4504259;Q99880;4504263;Q99879;4504261;Q99877;9973351;P57053	M2(Oxidation); M5(Oxidation)	1775.81				High	4.41491	0
	KESYSVYVYK	3	8	8	4504257;P62807;10800138;P58876;4504269;Q93079;18105048;O60814;4504259;Q99880;4504263;Q99879;4504261;Q99877;9973351;P57053		1265.64				High	2.9665	1
	LLLPGELAK	1	8	8	4504257;P62807;10800138;P58876;4504269;Q93079;18105048;O60814;4504259;Q99880;4504263;Q99879;4504261;Q99877;9973351;P57053		953.602				Low	2.0575	0
Q99880	Histone H2B type 1-L OS=Homo sapiens GN=HIST1H2BL PE=1 SV=3 - [H2B1L_HUMAN]	26.98	1	0	3	47		0			188.042	26.98	3	47	126	13.9436	10.3159
	Sequence	# PSMs	# Proteins	# Protein Groups	Protein Group Accessions	Modifications	MH+ [Da]	A2	IonScore A2	Exp Value A2	A4	XCorr A4	# Missed Cleavages
	AMGIMNSFVNDIFER	32	8	8	4504257;P62807;10800138;P58876;4504269;Q93079;18105048;O60814;4504259;Q99880;4504263;Q99879;4504261;Q99877;9973351;P57053		1743.82				High	4.91838	0
	AMGIMNSFVNDIFER	6	8	8	4504257;P62807;10800138;P58876;4504269;Q93079;18105048;O60814;4504259;Q99880;4504263;Q99879;4504261;Q99877;9973351;P57053	M2(Oxidation)	1759.82				High	4.57464	0
	AMGIMNSFVNDIFER	5	8	8	4504257;P62807;10800138;P58876;4504269;Q93079;18105048;O60814;4504259;Q99880;4504263;Q99879;4504261;Q99877;9973351;P57053	M2(Oxidation); M5(Oxidation)	1775.81				High	4.41491	0
	KESYSVYVYK	3	8	8	4504257;P62807;10800138;P58876;4504269;Q93079;18105048;O60814;4504259;Q99880;4504263;Q99879;4504261;Q99877;9973351;P57053		1265.64				High	2.9665	1
	LLLPGELAK	1	8	8	4504257;P62807;10800138;P58876;4504269;Q93079;18105048;O60814;4504259;Q99880;4504263;Q99879;4504261;Q99877;9973351;P57053		953.602				Low	2.0575	0
Q99879	Histone H2B type 1-M OS=Homo sapiens GN=HIST1H2BM PE=1 SV=3 - [H2B1M_HUMAN]	26.98	1	0	3	47		0			188.042	26.98	3	47	126	13.9806	10.3159
	Sequence	# PSMs	# Proteins	# Protein Groups	Protein Group Accessions	Modifications	MH+ [Da]	A2	IonScore A2	Exp Value A2	A4	XCorr A4	# Missed Cleavages
	AMGIMNSFVNDIFER	32	8	8	4504257;P62807;10800138;P58876;4504269;Q93079;18105048;O60814;4504259;Q99880;4504263;Q99879;4504261;Q99877;9973351;P57053		1743.82				High	4.91838	0
	AMGIMNSFVNDIFER	6	8	8	4504257;P62807;10800138;P58876;4504269;Q93079;18105048;O60814;4504259;Q99880;4504263;Q99879;4504261;Q99877;9973351;P57053	M2(Oxidation)	1759.82				High	4.57464	0
	AMGIMNSFVNDIFER	5	8	8	4504257;P62807;10800138;P58876;4504269;Q93079;18105048;O60814;4504259;Q99880;4504263;Q99879;4504261;Q99877;9973351;P57053	M2(Oxidation); M5(Oxidation)	1775.81				High	4.41491	0
	KESYSVYVYK	3	8	8	4504257;P62807;10800138;P58876;4504269;Q93079;18105048;O60814;4504259;Q99880;4504263;Q99879;4504261;Q99877;9973351;P57053		1265.64				High	2.9665	1
	LLLPGELAK	1	8	8	4504257;P62807;10800138;P58876;4504269;Q93079;18105048;O60814;4504259;Q99880;4504263;Q99879;4504261;Q99877;9973351;P57053		953.602				Low	2.0575	0
Q99877	Histone H2B type 1-N OS=Homo sapiens GN=HIST1H2BN PE=1 SV=3 - [H2B1N_HUMAN]	26.98	1	0	3	47		0			188.042	26.98	3	47	126	13.9136	10.3159
	Sequence	# PSMs	# Proteins	# Protein Groups	Protein Group Accessions	Modifications	MH+ [Da]	A2	IonScore A2	Exp Value A2	A4	XCorr A4	# Missed Cleavages
	AMGIMNSFVNDIFER	32	8	8	4504257;P62807;10800138;P58876;4504269;Q93079;18105048;O60814;4504259;Q99880;4504263;Q99879;4504261;Q99877;9973351;P57053		1743.82				High	4.91838	0
	AMGIMNSFVNDIFER	6	8	8	4504257;P62807;10800138;P58876;4504269;Q93079;18105048;O60814;4504259;Q99880;4504263;Q99879;4504261;Q99877;9973351;P57053	M2(Oxidation)	1759.82				High	4.57464	0
	AMGIMNSFVNDIFER	5	8	8	4504257;P62807;10800138;P58876;4504269;Q93079;18105048;O60814;4504259;Q99880;4504263;Q99879;4504261;Q99877;9973351;P57053	M2(Oxidation); M5(Oxidation)	1775.81				High	4.41491	0
	KESYSVYVYK	3	8	8	4504257;P62807;10800138;P58876;4504269;Q93079;18105048;O60814;4504259;Q99880;4504263;Q99879;4504261;Q99877;9973351;P57053		1265.64				High	2.9665	1
	LLLPGELAK	1	8	8	4504257;P62807;10800138;P58876;4504269;Q93079;18105048;O60814;4504259;Q99880;4504263;Q99879;4504261;Q99877;9973351;P57053		953.602				Low	2.0575	0
P57053	Histone H2B type F-S OS=Homo sapiens GN=H2BFS PE=1 SV=2 - [H2BFS_HUMAN]	26.98	1	0	3	47		0			188.042	26.98	3	47	126	13.9356	10.3745
	Sequence	# PSMs	# Proteins	# Protein Groups	Protein Group Accessions	Modifications	MH+ [Da]	A2	IonScore A2	Exp Value A2	A4	XCorr A4	# Missed Cleavages
	AMGIMNSFVNDIFER	32	8	8	4504257;P62807;10800138;P58876;4504269;Q93079;18105048;O60814;4504259;Q99880;4504263;Q99879;4504261;Q99877;9973351;P57053		1743.82				High	4.91838	0
	AMGIMNSFVNDIFER	6	8	8	4504257;P62807;10800138;P58876;4504269;Q93079;18105048;O60814;4504259;Q99880;4504263;Q99879;4504261;Q99877;9973351;P57053	M2(Oxidation)	1759.82				High	4.57464	0
	AMGIMNSFVNDIFER	5	8	8	4504257;P62807;10800138;P58876;4504269;Q93079;18105048;O60814;4504259;Q99880;4504263;Q99879;4504261;Q99877;9973351;P57053	M2(Oxidation); M5(Oxidation)	1775.81				High	4.41491	0
	KESYSVYVYK	3	8	8	4504257;P62807;10800138;P58876;4504269;Q93079;18105048;O60814;4504259;Q99880;4504263;Q99879;4504261;Q99877;9973351;P57053		1265.64				High	2.9665	1
	LLLPGELAK	1	8	8	4504257;P62807;10800138;P58876;4504269;Q93079;18105048;O60814;4504259;Q99880;4504263;Q99879;4504261;Q99877;9973351;P57053		953.602				Low	2.0575	0
Q16695	Histone H3.1t OS=Homo sapiens GN=HIST3H3 PE=1 SV=3 - [H31T_HUMAN]	19.85	1	1	3	5		0			11.8491	19.85	3	5	136	15.4985	11.1216
	Sequence	# PSMs	# Proteins	# Protein Groups	Protein Group Accessions	Modifications	MH+ [Da]	A2	IonScore A2	Exp Value A2	A4	XCorr A4	# Missed Cleavages
	EIAQDFKTDLR	2	1	1	4504299;Q16695		1335.69				High	2.8165	1
	YRPGTVALR	2	1	1	4504299;Q16695		1032.59				Low	2.24921	0
	STELLIR	1	1	1	4504299;Q16695		831.494				Low	2.13652	0
P31943	Heterogeneous nuclear ribonucleoprotein H OS=Homo sapiens GN=HNRNPH1 PE=1 SV=4 - [HNRH1_HUMAN]	10.47	1	3	3	5		0			17.8944	10.47	3	5	449	49.1984	6.30322
	Sequence	# PSMs	# Proteins	# Protein Groups	Protein Group Accessions	Modifications	MH+ [Da]	A2	IonScore A2	Exp Value A2	A4	XCorr A4	# Missed Cleavages
	STGEAFVQFASQEIAEK	2	1	1	5031753;P31943		1841.89				High	4.20213	0
	ATENDIYNFFSPLNPVR	2	1	1	5031753;P31943		1996.98				High	3.94355	0
	GLPWSCSADEVQR	1	1	1	5031753;P31943	C6(Carbamidomethyl)	1504.68				Medium	2.43098	0
P07910	Heterogeneous nuclear ribonucleoproteins C1/C2 OS=Homo sapiens GN=HNRNPC PE=1 SV=4 - [HNRPC_HUMAN]	12.75	1	3	3	6		0			19.351	12.75	3	6	306	33.6495	5.08447
	Sequence	# PSMs	# Proteins	# Protein Groups	Protein Group Accessions	Modifications	MH+ [Da]	A2	IonScore A2	Exp Value A2	A4	XCorr A4	# Missed Cleavages
	MIAGQVLDINLAAEPK	2	1	1	117189975;P07910		1682.92				High	4.56796	0
	GFAFVQYVNER	2	1	1	117189975;P07910		1329.66				High	2.79295	0
	VFIGNLNTLVVK	2	1	1	117189975;P07910		1316.79				High	2.60627	0
P38159	RNA-binding motif protein, X chromosome OS=Homo sapiens GN=RBMX PE=1 SV=3 - [RBMX_HUMAN]	9.97	1	0	3	8		0			9.59429	9.97	3	4	391	42.3063	10.0522
	Sequence	# PSMs	# Proteins	# Protein Groups	Protein Group Accessions	Modifications	MH+ [Da]	A2	IonScore A2	Exp Value A2	A4	XCorr A4	# Missed Cleavages
	LFIGGLNTETNEK	4	2	2	542850;56699409;P38159		1435.75	High	59.82	0.00180191	Medium	2.46145	0
	DSYESYGNSR	2	2	2	542850;56699409;P38159		1177.48	Medium	36.83	0.0184149	Low	2.22572	0
	AIKVEQATKPSFESGR	2	2	2	56699409;P38159;542850		1747.93	Low	24.33	5.55201	Low	2.52961	1
P61978	Heterogeneous nuclear ribonucleoprotein K OS=Homo sapiens GN=HNRNPK PE=1 SV=1 - [HNRPK_HUMAN]	12.31	1	3	4	6		0			19.6626	12.31	4	6	463	50.9444	5.5415
	Sequence	# PSMs	# Proteins	# Protein Groups	Protein Group Accessions	Modifications	MH+ [Da]	A2	IonScore A2	Exp Value A2	A4	XCorr A4	# Missed Cleavages
	TDYNASVSVPDSSGPER	2	1	1	13384620;P61978		1780.8				High	3.88581	0
	GSYGDLGGPIITTQVTIPK	1	1	1	13384620;P61978		1917.03				High	3.79527	0
	IILDLISESPIK	2	1	1	13384620;P61978		1340.8				High	3.25789	0
	GSDFDCELR	1	1	1	13384620;P61978	C6(Carbamidomethyl)	1098.45				Low	2.31483	0
P07900	Heat shock protein HSP 90-alpha OS=Homo sapiens GN=HSP90AA1 PE=1 SV=5 - [HS90A_HUMAN]	7.65	1	3	5	8		0			21.512	7.65	5	8	732	84.6067	5.021
	Sequence	# PSMs	# Proteins	# Protein Groups	Protein Group Accessions	Modifications	MH+ [Da]	A2	IonScore A2	Exp Value A2	A4	XCorr A4	# Missed Cleavages
	GVVDSEDLPLNISR	2	1	1	154146191;P07900		1513.79				High	3.35982	0
	ADLINNLGTIAK	2	1	1	154146191;P07900		1242.71				High	3.35847	0
	YIDQEELNK	2	1	1	154146191;P07900		1151.56				Medium	2.49168	0
	HIYYITGETK	1	1	1	154146191;P07900		1224.63				Low	2.15375	0
	DQVANSAFVER	1	1	1	154146191;P07900		1235.6				Low	2.0115	0
P08107	Heat shock 70 kDa protein 1A/1B OS=Homo sapiens GN=HSPA1A PE=1 SV=5 - [HSP71_HUMAN]	42.43	1	19	21	65		0			207.481	42.43	21	65	641	70.009	5.65576
	Sequence	# PSMs	# Proteins	# Protein Groups	Protein Group Accessions	Modifications	MH+ [Da]	A2	IonScore A2	Exp Value A2	A4	XCorr A4	# Missed Cleavages
	SINPDEAVAYGAAVQAAILMGDK	2	1	1	167466173;P08107	M20(Oxidation)	2320.15				High	5.2054	0
	SINPDEAVAYGAAVQAAILMGDK	3	1	1	167466173;P08107		2304.16				High	5.19596	0
	NQVALNPQNTVFDAK	4	1	1	167466173;P08107		1658.85				High	4.86353	0
	MKEIAEAYLGYPVTNAVITVPAYFNDSQR	1	1	1	167466173;P08107		3260.63				High	4.33258	1
	HWPFQVINDGDKPK	3	1	1	167466173;P08107		1680.85				High	4.11808	0
	IINEPTAAAIAYGLDR	4	1	1	167466173;P08107		1687.9				High	3.69349	0
	LDKAQIHDLVLVGGSTR	2	1	1	167466173;P08107		1822.02				High	3.69001	1
	MKEIAEAYLGYPVTNAVITVPAYFNDSQR	3	1	1	167466173;P08107	M1(Oxidation)	3276.63				High	3.62223	1
	MVQEAEKYKAEDEVQR	2	1	1	167466173;P08107		1952.94				High	3.55465	2
	DAGVIAGLNVLR	4	1	1	167466173;P08107		1197.7				High	3.45264	0
	AQIHDLVLVGGSTR	2	1	1	167466173;P08107		1465.81				High	3.39029	0
	MVQEAEKYKAEDEVQR	2	1	1	167466173;P08107	M1(Oxidation)	1968.93				High	3.38323	2
	ARFEELCSDLFR	3	1	1	167466173;P08107	C7(Carbamidomethyl)	1542.74				High	3.32028	1
	ATAGDTHLGGEDFDNR	2	1	1	167466173;P08107		1675.73				High	3.30418	0
	VEIIANDQGNR	6	2	2	16507237;P11021;167466173;P08107		1228.63				High	3.02372	0
	AFYPEEISSMVLTK	4	1	1	167466173;P08107		1614.81				High	2.9354	0
	CQEVISWLDANTLAEKDEFEHK	1	1	1	167466173;P08107	C1(Carbamidomethyl)	2662.25				Low	2.85245	1
	LVNHFVEEFK	2	1	1	167466173;P08107		1261.66				High	2.80355	0
	TTPSYVAFTDTER	4	1	1	167466173;P08107		1487.7				High	2.77796	0
	KFGDPVVQSDMK	2	1	1	167466173;P08107		1350.67				High	2.74518	1
	NALESYAFNMK	3	1	1	167466173;P08107		1287.6				High	2.63447	0
	FGDPVVQSDMK	2	1	1	167466173;P08107		1222.58				Medium	2.54547	0
	FEELCSDLFR	2	1	1	167466173;P08107	C5(Carbamidomethyl)	1315.6				Medium	2.45998	0
	LLQDFFNGR	2	1	1	167466173;P08107		1109.57				Low	2.13587	0
Q9NZI8	Insulin-like growth factor 2 mRNA-binding protein 1 OS=Homo sapiens GN=IGF2BP1 PE=1 SV=2 - [IF2B1_HUMAN]	4.51	1	1	2	2		0			4.49598	4.51	2	2	577	63.4412	9.20264
	Sequence	# PSMs	# Proteins	# Protein Groups	Protein Group Accessions	Modifications	MH+ [Da]	A2	IonScore A2	Exp Value A2	A4	XCorr A4	# Missed Cleavages
	DQTPDENDQVIVK	1	1	1	56237027;Q9NZI8		1500.72				Medium	2.38241	0
	MVIITGPPEAQFK	1	1	1	56237027;Q9NZI8		1430.77				Low	2.11357	0
Q12905	Interleukin enhancer-binding factor 2 OS=Homo sapiens GN=ILF2 PE=1 SV=2 - [ILF2_HUMAN]	18.21	1	4	4	9		0			27.8196	18.21	4	9	390	43.0352	5.26221
	Sequence	# PSMs	# Proteins	# Protein Groups	Protein Group Accessions	Modifications	MH+ [Da]	A2	IonScore A2	Exp Value A2	A4	XCorr A4	# Missed Cleavages
	AQDPSEVLTMLTNETGFEISSSDATVK	3	1	1	13385872;Q12905		2870.36				High	3.9974	0
	NQDLAPNSAEQASILSLVTK	2	1	1	13385872;Q12905		2099.1				High	3.38577	0
	ILPTLEAVAALGNK	2	1	1	13385872;Q12905		1409.84				High	3.28119	0
	VLQSALAAIR	2	1	1	13385872;Q12905		1041.64				Medium	2.57427	0
P12268	Inosine-5'-monophosphate dehydrogenase 2 OS=Homo sapiens GN=IMPDH2 PE=1 SV=2 - [IMDH2_HUMAN]	9.53	1	3	3	3		0			10.8284	9.53	3	3	514	55.7696	6.90283
	Sequence	# PSMs	# Proteins	# Protein Groups	Protein Group Accessions	Modifications	MH+ [Da]	A2	IonScore A2	Exp Value A2	A4	XCorr A4	# Missed Cleavages
	DKYPNLQVIGGNVVTAAQAK	1	1	1	66933016;P12268		2086.13				High	5.34832	1
	TSSAQVEGGVHSLHSYEK	1	1	1	66933016;P12268		1915.91				High	3.0898	0
	NLIDAGVDALR	1	1	1	66933016;P12268		1156.63				Medium	2.39028	0
P13645	Keratin, type I cytoskeletal 10 OS=Homo sapiens GN=KRT10 PE=1 SV=6 - [K1C10_HUMAN]	41.27	1	20	21	63		0			224.227	41.27	21	63	584	58.7917	5.21143
	Sequence	# PSMs	# Proteins	# Protein Groups	Protein Group Accessions	Modifications	MH+ [Da]	A2	IonScore A2	Exp Value A2	A4	XCorr A4	# Missed Cleavages
	ADLEMQIESLTEELAYLK	5	1	1	269849769;P13645		2096.05				High	5.47481	0
	ADLEMQIESLTEELAYLKK	2	1	1	269849769;P13645		2224.14				High	5.27136	1
	ADLEMQIESLTEELAYLK	6	1	1	269849769;P13645	M5(Oxidation)	2112.04				High	5.23327	0
	AETECQNTEYQQLLDIK	2	1	1	269849769;P13645	C5(Carbamidomethyl)	2082.97				High	5.21421	0
	SKELTTEIDNNIEQISSYK	5	1	1	269849769;P13645		2212.1				High	5.16793	1
	TIDDLKNQILNLTTDNANILLQIDNAR	3	1	1	269849769;P13645		3052.63				High	5.1016	1
	ELTTEIDNNIEQISSYK	2	1	1	269849769;P13645		1996.97				High	5.0832	0
	GSLGGGFSSGGFSGGSFSR	2	1	1	269849769;P13645		1707.77				High	4.84281	0
	NVQALEIELQSQLALK	3	1	1	269849769;P13645		1797.01				High	3.82453	0
	NVSTGDVNVEMNAAPGVDLTQLLNNMR	1	1	1	269849769;P13645	M11(Oxidation)	2888.39				High	3.58745	0
	IRLENEIQTYR	2	1	1	269849769;P13645		1434.77				High	3.54964	1
	SQYEQLAEQNRK	2	1	1	269849769;P13645		1493.73				High	3.38766	1
	NVSTGDVNVEMNAAPGVDLTQLLNNMR	1	1	1	269849769;P13645		2872.4				High	3.18142	0
	LENEIQTYR	2	1	1	269849769;P13645		1165.58				High	3.13217	0
	ALEESNYELEGK	5	1	1	269849769;P13645		1381.65				High	3.08987	0
	ADLEMQIESLTEELAYLKK	2	1	1	269849769;P13645	M5(Oxidation)	2240.14				Medium	3.05423	1
	LKYENEVALR	3	1	1	269849769;P13645		1234.68				Medium	3.01995	1
	SQYEQLAEQNR	2	1	1	269849769;P13645		1365.64				High	3.01723	0
	SLLEGEGSSGGGGR	3	1	1	269849769;P13645		1262.6				High	2.77629	0
	YENEVALR	2	1	1	269849769;P13645		993.499				High	2.68725	0
	DAEAWFNEK	1	1	1	269849769;P13645		1109.49				Medium	2.42574	0
	QSLEASLAETEGR	4	1	1	269849769;P13645		1390.68				Medium	2.42099	0
	VLDELTLTK	2	1	1	269849769;P13645		1031.6				Medium	2.39933	0
	LAADDFR	1	2	2	269849769;P13645;229463044;P02533		807.4				Low	2.0636	0
P02533	Keratin, type I cytoskeletal 14 OS=Homo sapiens GN=KRT14 PE=1 SV=4 - [K1C14_HUMAN]	28.81	1	8	11	20		0			56.2293	28.81	11	20	472	51.5294	5.16064
	Sequence	# PSMs	# Proteins	# Protein Groups	Protein Group Accessions	Modifications	MH+ [Da]	A2	IonScore A2	Exp Value A2	A4	XCorr A4	# Missed Cleavages
	LLEGEDAHLSSSQFSSGSQSSR	2	1	1	229463044;P02533		2309.06				High	4.07707	0
	EVATNSELVQSGK	2	1	1	229463044;P02533		1361.69				High	3.75692	0
	TRLEQEIATYR	2	1	1	229463044;P02533		1379.73				High	3.32897	1
	ISSVLAGGSCR	2	1	1	229463044;P02533	C10(Carbamidomethyl)	1106.56				High	2.86326	0
	GSCGIGGGIGGGSSR	2	1	1	229463044;P02533	C3(Carbamidomethyl)	1278.59				High	2.79568	0
	VLDELTLAR	2	1	1	229463044;P02533		1029.59				High	2.64106	0
	ALEEANADLEVK	3	1	1	229463044;P02533		1301.66				Medium	2.50822	0
	APSTYGGGLSVSSSR	2	1	1	229463044;P02533		1425.7				Medium	2.4931	0
	ASLENSLEETK	1	1	1	229463044;P02533		1220.6				Low	2.16746	0
	TKYETELNLR	1	1	1	229463044;P02533		1266.67				Low	2.10112	1
	LAADDFR	1	2	2	269849769;P13645;229463044;P02533		807.4				Low	2.0636	0
P35527	Keratin, type I cytoskeletal 9 OS=Homo sapiens GN=KRT9 PE=1 SV=3 - [K1C9_HUMAN]	51.2	1	16	16	51		0			205.676	51.2	16	51	623	62.0268	5.23682
	Sequence	# PSMs	# Proteins	# Protein Groups	Protein Group Accessions	Modifications	MH+ [Da]	A2	IonScore A2	Exp Value A2	A4	XCorr A4	# Missed Cleavages
	GGSGGSHGGGSGFGGESGGSYGGGEEASGSGGGYGGGSGK	1	1	1	55956899;P35527		3223.27				High	6.94258	0
	HGVQELEIELQSQLSK	3	1	1	55956899;P35527		1837.97				High	6.05368	0
	DIENQYETQITQIEHEVSSSGQEVQSSAK	6	1	1	55956899;P35527		3264.52				High	5.99331	0
	HGVQELEIELQSQLSKK	2	1	1	55956899;P35527		1966.06				High	5.71537	1
	EIETYHNLLEGGQEDFESSGAGK	6	1	1	55956899;P35527		2510.14				High	5.01005	0
	QEIECQNQEYSLLLSIK	1	1	1	55956899;P35527	C5(Carbamidomethyl)	2095.04				High	4.98896	0
	GGSGGSYGGGSGSGGGSGGGYGGGSGGGHSGGSGGGHSGGSGGNYGGGSGSGGGSGGGYGGGSGSR	3	1	1	55956899;P35527		4972.94				High	4.78045	0
	VQALEEANNDLENK	2	1	1	55956899;P35527		1586.77				High	4.73958	0
	NYSPYYNTIDDLKDQIVDLTVGNNK	14	1	1	55956899;P35527		2902.41				High	4.17619	1
	GGSGGSYGGGGSGGGYGGGSGSR	3	1	1	55956899;P35527		1791.73				High	3.97558	0
	LASYLDKVQALEEANNDLENK	2	1	1	55956899;P35527		2377.19				High	3.82565	1
	TLNDMRQEYEQLIAK	1	1	1	55956899;P35527		1851.93				High	3.16263	1
	FSSSSGYGGGSSR	1	1	1	55956899;P35527		1235.53				High	3.11674	0
	TLNDMRQEYEQLIAK	1	1	1	55956899;P35527	M5(Oxidation)	1867.92				High	2.78401	1
	TLLDIDNTR	3	1	1	55956899;P35527		1060.56				Medium	2.45272	0
	QGVDADINGLR	1	1	1	55956899;P35527		1157.59				Medium	2.34277	0
	IKFEMEQNLR	1	1	1	55956899;P35527	M5(Oxidation)	1323.67				Low	2.13692	1
P35908	Keratin, type II cytoskeletal 2 epidermal OS=Homo sapiens GN=KRT2 PE=1 SV=2 - [K22E_HUMAN]	30.52	1	9	14	35		0			104.166	30.52	14	35	639	65.3932	8.00146
	Sequence	# PSMs	# Proteins	# Protein Groups	Protein Group Accessions	Modifications	MH+ [Da]	A2	IonScore A2	Exp Value A2	A4	XCorr A4	# Missed Cleavages
	NKLNDLEEALQQAKEDLAR	2	1	1	47132620;P35908		2198.14				High	3.74969	2
	FLEQQNQVLQTK	8	2	2	47132620;P35908;119395750;P04264		1475.78				High	3.68213	0
	GFSSGSAVVSGGSR	2	1	1	47132620;P35908		1254.61				High	3.63866	0
	GGSGGGGSISGGGYGSGGGSGGR	1	1	1	47132620;P35908		1741.75				High	3.61424	0
	NLDLDSIIAEVK	4	2	2	47132620;P35908;119703753;P04259		1329.73				High	3.54702	0
	TSQNSELNNMQDLVEDYKK	1	1	1	47132620;P35908		2256.04				High	3.48218	1
	TAAENDFVTLKK	2	1	1	47132620;P35908		1336.71				High	3.06494	1
	VLYDAEISQIHQSVTDTNVILSMDNSR	1	1	1	47132620;P35908	M23(Oxidation)	3064.49				Medium	3.05977	0
	VDLLNQEIEFLK	3	1	1	47132620;P35908		1460.8				High	2.87104	0
	AQYEEIAQR	1	2	2	47132620;P35908;119703753;P04259		1107.54				High	2.74489	0
	IEISELNR	4	2	2	47132620;P35908;119395750;P04264		973.532				High	2.6487	0
	STSSFSCLSR	2	1	1	47132620;P35908	C7(Carbamidomethyl)	1131.51				High	2.63474	0
	YLDGLTAER	2	1	1	47132620;P35908		1037.53				Medium	2.57127	0
	DYQELMNVK	2	1	1	47132620;P35908		1139.54				Low	2.16368	0
P04264	Keratin, type II cytoskeletal 1 OS=Homo sapiens GN=KRT1 PE=1 SV=6 - [K2C1_HUMAN]	44.88	1	22	27	92		0			301.187	44.88	27	92	644	65.999	8.11865
	Sequence	# PSMs	# Proteins	# Protein Groups	Protein Group Accessions	Modifications	MH+ [Da]	A2	IonScore A2	Exp Value A2	A4	XCorr A4	# Missed Cleavages
	GGGGGGYGSGGSSYGSGGGSYGSGGGGGGGR	7	1	1	119395750;P04264		2383.96				High	5.29994	0
	NKLNDLEDALQQAKEDLAR	3	1	1	119395750;P04264		2184.13				High	5.09017	2
	NKLNDLEDALQQAK	4	1	1	119395750;P04264		1599.83				High	4.16934	1
	MSGECAPNVSVSVSTSHTTISGGGSR	2	1	1	119395750;P04264	M1(Oxidation); C5(Carbamidomethyl)	2581.16				High	4.15572	0
	MSGECAPNVSVSVSTSHTTISGGGSR	2	1	1	119395750;P04264	C5(Carbamidomethyl)	2565.17				High	4.14143	0
	FSSCGGGGGSFGAGGGFGSR	1	1	1	119395750;P04264	C4(Carbamidomethyl)	1765.74				High	4.03406	0
	LNDLEDALQQAK	2	1	1	119395750;P04264		1357.7				High	3.8215	0
	FLEQQNQVLQTK	8	2	2	47132620;P35908;119395750;P04264		1475.78				High	3.68213	0
	SLDLDSIIAEVK	19	1	1	119395750;P04264		1302.72				High	3.67951	0
	THNLEPYFESFINNLR	2	1	1	119395750;P04264		1993.98				High	3.59261	0
	LNDLEDALQQAKEDLAR	2	1	1	119395750;P04264		1941.99				High	3.55564	1
	SLNNQFASFIDK	4	1	1	119395750;P04264		1383.69				High	3.41052	0
	YEELQITAGR	6	2	2	119395750;P04264;119703753;P04259		1179.6				High	3.38666	0
	QISNLQQSISDAEQR	2	1	1	119395750;P04264		1716.85				High	3.3664	0
	LDSELKNMQDMVEDYR	2	1	1	119395750;P04264	M8(Oxidation); M11(Oxidation)	2017.88				High	3.27803	1
	SLDLDSIIAEVKAQYEDIAQK	1	1	1	119395750;P04264		2349.22				High	3.23763	1
	WELLQQVDTSTR	2	1	1	119395750;P04264		1475.75				High	3.21549	0
	TNAENEFVTIKK	2	1	1	119395750;P04264		1393.73				High	3.19293	1
	SGGGFSSGSAGIINYQR	1	1	1	119395750;P04264		1657.79				High	3.10536	0
	NMQDMVEDYR	3	1	1	119395750;P04264	M2(Oxidation); M5(Oxidation)	1332.52				High	3.06124	0
	LLRDYQELMNTK	1	1	1	119395750;P04264		1523.79				Medium	3.01841	1
	LALDLEIATYR	1	1	1	119395750;P04264		1277.71				High	2.69662	0
	AEAESLYQSK	2	1	1	119395750;P04264		1125.54				High	2.67646	0
	IEISELNR	4	2	2	47132620;P35908;119395750;P04264		973.532				High	2.6487	0
	TNAENEFVTIK	2	1	1	119395750;P04264		1265.64				Medium	2.42201	0
	TLLEGEESR	1	1	1	119395750;P04264		1033.52				Medium	2.39122	0
	NMQDMVEDYR	2	1	1	119395750;P04264		1300.53				Low	2.32837	0
	AQYEDIAQK	2	1	1	119395750;P04264		1065.52				Low	2.28806	0
	DYQELMNTK	2	1	1	119395750;P04264		1141.52				Low	2.03425	0
P04259	Keratin, type II cytoskeletal 6B OS=Homo sapiens GN=KRT6B PE=1 SV=5 - [K2C6B_HUMAN]	10.28	1	2	5	13		0			38.6439	10.28	5	13	564	60.0303	8.00146
	Sequence	# PSMs	# Proteins	# Protein Groups	Protein Group Accessions	Modifications	MH+ [Da]	A2	IonScore A2	Exp Value A2	A4	XCorr A4	# Missed Cleavages
	NLDLDSIIAEVK	4	2	2	47132620;P35908;119703753;P04259		1329.73				High	3.54702	0
	YEELQITAGR	6	2	2	119395750;P04264;119703753;P04259		1179.6				High	3.38666	0
	QNLEPLFEQYINNLR	1	1	1	119703753;P04259		1890.97				High	2.9427	0
	AQYEEIAQR	1	2	2	47132620;P35908;119703753;P04259		1107.54				High	2.74489	0
	ADTLTDEINFLR	1	1	1	119703753;P04259		1407.71				Medium	2.34944	0
P12277	Creatine kinase B-type OS=Homo sapiens GN=CKB PE=1 SV=1 - [KCRB_HUMAN]	21.52	1	5	5	9		0			29.8182	21.52	5	9	381	42.6173	5.59229
	Sequence	# PSMs	# Proteins	# Protein Groups	Protein Group Accessions	Modifications	MH+ [Da]	A2	IonScore A2	Exp Value A2	A4	XCorr A4	# Missed Cleavages
	GTGGVDTAAVGGVFDVSNADR	1	1	1	21536286;P12277		1964.93				High	4.73385	0
	LGFSEVELVQMVVDGVK	2	1	1	21536286;P12277		1848.98				High	3.83231	0
	LAVEALSSLDGDLAGR	2	1	1	21536286;P12277		1586.84				High	3.44998	0
	FCTGLTQIETLFK	2	1	1	21536286;P12277	C2(Carbamidomethyl)	1557.8				High	3.29203	0
	LEQGQAIDDLMPAQK	2	1	1	21536286;P12277		1656.83				High	2.94355	0
P14618	Pyruvate kinase isozymes M1/M2 OS=Homo sapiens GN=PKM PE=1 SV=4 - [KPYM_HUMAN]	17.51	1	4	6	15		0			51.4389	17.51	6	15	531	57.9	7.84033
	Sequence	# PSMs	# Proteins	# Protein Groups	Protein Group Accessions	Modifications	MH+ [Da]	A2	IonScore A2	Exp Value A2	A4	XCorr A4	# Missed Cleavages
	FGVEQDVDMVFASFIR	3	1	1	33286418;P14618	M9(Oxidation)	1875.9				High	5.49867	0
	LAPITSDPTEATAVGAVEASFK	1	1	1	33286418;P14618		2175.12				High	4.23549	0
	GIFPVLCKDPVQEAWAEDVDLR	3	1	1	33286418;P14618	C7(Carbamidomethyl)	2557.28				High	4.16122	1
	FGVEQDVDMVFASFIR	2	1	1	33286418;P14618		1859.9				High	3.46477	0
	NTGIICTIGPASR	3	1	1	33286418;P14618	C6(Carbamidomethyl)	1359.71				High	3.11893	0
	GDLGIEIPAEK	2	1	1	33286418;P14618		1141.61				Low	2.20968	0
	VNFAMNVGK	1	1	1	33286418;P14618		979.502				Low	2.02073	0
P05455	Lupus La protein OS=Homo sapiens GN=SSB PE=1 SV=2 - [LA_HUMAN]	17.4	1	4	5	6		0			18.9017	17.4	5	6	408	46.8082	7.12256
	Sequence	# PSMs	# Proteins	# Protein Groups	Protein Group Accessions	Modifications	MH+ [Da]	A2	IonScore A2	Exp Value A2	A4	XCorr A4	# Missed Cleavages
	SKAELMEISEDKTK	1	1	1	10835067;P05455		1608.81				High	3.86681	2
	LTTDFNVIVEALSK	2	1	1	10835067;P05455		1549.85				High	3.61166	0
	LDEGWVPLEIMIK	1	1	1	10835067;P05455		1542.82				High	3.285	0
	IIEDQQESLNK	1	1	1	10835067;P05455		1316.67				High	2.9637	0
	RSPSKPLPEVTDEYKNDVK	1	1	1	10835067;P05455		2202.14				Low	2.24046	2
P00338	L-lactate dehydrogenase A chain OS=Homo sapiens GN=LDHA PE=1 SV=2 - [LDHA_HUMAN]	25.6	1	0	7	25		0			37.276	20.78	6	11	332	36.6654	8.26514
	Sequence	# PSMs	# Proteins	# Protein Groups	Protein Group Accessions	Modifications	MH+ [Da]	A2	IonScore A2	Exp Value A2	A4	XCorr A4	# Missed Cleavages
	LLIVSNPVDILTYVAWK	8	3	3	5031857;P00338;13786849;380765070		1944.12	High	122.17	2.89626e-10	High	5.21965	0
	VIGSGCNLDSAR	4	6	6	5031857;P00338;4557032;P07195;13786847;13786849;49259209;380765070	C6(Carbamidomethyl)	1248.6	High	75.83	2.44446e-05	High	2.70298	0
	VTLTSEEEAR	4	3	3	13786849;380765070;5031857;P00338		1134.56	Medium	46.59	0.0287356	Low	2.23385	0
	LVIITAGAR	4	3	3	13786849;380765070;5031857;P00338		913.584	Medium	41.52	0.0353474	Low	2.2455	0
	SADTLWGIQK	2	3	3	5031857;P00338;13786849;380765070		1118.58	Low	36.6	0.385626	High	2.7958	0
	QVVESAYEVIK	2	3	3	5031857;P00338;13786849;380765070		1264.68	Low	34.55	0.610747	Medium	2.42829	0
	TLHPDLGTDKDKEQWK	1	3	3	13786849;380765070;5031857;P00338		1910.96	Low	12.19	85.5795			2
P07195	L-lactate dehydrogenase B chain OS=Homo sapiens GN=LDHB PE=1 SV=2 - [LDHB_HUMAN]	28.74	1	0	8	35		0			45.645	26.05	7	16	334	36.6151	6.04932
	Sequence	# PSMs	# Proteins	# Protein Groups	Protein Group Accessions	Modifications	MH+ [Da]	A2	IonScore A2	Exp Value A2	A4	XCorr A4	# Missed Cleavages
	VIGSGCNLDSAR	4	6	6	5031857;P00338;4557032;P07195;13786847;13786849;49259209;380765070	C6(Carbamidomethyl)	1248.6	High	75.83	2.44446e-05	High	2.70298	0
	LIAPVAEEEATVPNNK	4	3	3	4557032;P07195;13786847;49259209		1694.9	High	74.31	5.39544e-05	High	3.40104	0
	IVADKDYSVTANSK	7	3	3	4557032;P07195;13786847;49259209		1510.77	High	72.43	7.68839e-05	High	4.37738	1
	SADTLWDIQK	4	3	3	13786847;49259209;4557032;P07195		1176.59	High	69.52	0.000161716	Low	2.16024	0
	MVVESAYEVIK	2	3	3	13786847;49259209;4557032;P07195		1267.66	High	63.36	0.000609285	Low	2.19634	0
	SLADELALVDVLEDK	4	3	3	4557032;P07195;13786847;49259209		1629.86	High	62	0.000980602	High	2.99885	0
	IVVVTAGVR	4	3	3	4557032;P07195;13786847;49259209		913.583	Medium	46.52	0.0111778	High	2.71597	0
	MVVESAYEVIK	4	3	3	4557032;P07195;13786847;49259209	M1(Oxidation)	1283.65	Medium	44.62	0.0381315	High	2.90323	0
	GLTSVINQK	2	3	3	13786847;49259209;4557032;P07195		959.553	Low	37.09	0.289252			0
Q8IYB1	Protein MB21D2 OS=Homo sapiens GN=MB21D2 PE=1 SV=3 - [M21D2_HUMAN]	18.33	1	7	7	15		0			49.2461	18.33	7	15	491	55.7643	7.03467
	Sequence	# PSMs	# Proteins	# Protein Groups	Protein Group Accessions	Modifications	MH+ [Da]	A2	IonScore A2	Exp Value A2	A4	XCorr A4	# Missed Cleavages
	RGSTTSIPSPQSDGGDPNQPDDR	2	1	1	197333817;Q8IYB1		2384.07				High	4.4906	1
	LPVANEYLLLSGGVR	2	1	1	197333817;Q8IYB1		1600.91				High	4.09188	0
	MLYDIVPVVSFK	2	1	1	197333817;Q8IYB1		1410.77				High	3.74528	0
	GSTTSIPSPQSDGGDPNQPDDR	1	1	1	197333817;Q8IYB1		2227.97				High	3.41046	0
	DFIFSMLGMVQK	1	1	1	197333817;Q8IYB1		1415.71				High	3.27831	0
	GTDYDMDFTLLVPALK	6	1	1	197333817;Q8IYB1		1798.9				High	3.16506	0
	KLQQLVTENPGK	1	1	1	197333817;Q8IYB1		1354.77				High	3.0271	1
Q13765	Nascent polypeptide-associated complex subunit alpha OS=Homo sapiens GN=NACA PE=1 SV=1 - [NACA_HUMAN]	13.49	1	2	2	2		0			8.05695	13.49	2	2	215	23.3697	4.56396
	Sequence	# PSMs	# Proteins	# Protein Groups	Protein Group Accessions	Modifications	MH+ [Da]	A2	IonScore A2	Exp Value A2	A4	XCorr A4	# Missed Cleavages
	IEDLSQQAQLAAAEK	1	1	1	163965364;Q13765		1614.83				High	4.45126	0
	SPASDTYIVFGEAK	1	1	1	163965364;Q13765		1484.73				High	3.60569	0
Q15233	Non-POU domain-containing octamer-binding protein OS=Homo sapiens GN=NONO PE=1 SV=4 - [NONO_HUMAN]	7.86	1	2	2	10		0			35.1836	7.86	2	10	471	54.1973	8.95361
	Sequence	# PSMs	# Proteins	# Protein Groups	Protein Group Accessions	Modifications	MH+ [Da]	A2	IonScore A2	Exp Value A2	A4	XCorr A4	# Missed Cleavages
	NLPQYVSNELLEEAFSVFGQVER	8	1	1	34932414;Q15233		2668.33				High	4.51318	0
	FAQPGSFEYEYAMR	2	1	1	34932414;Q15233		1695.75				High	4.15475	0
P06748	Nucleophosmin OS=Homo sapiens GN=NPM1 PE=1 SV=2 - [NPM_HUMAN]	41.16	1	5	6	18		0			83.2565	41.16	6	18	294	32.5548	4.77979
	Sequence	# PSMs	# Proteins	# Protein Groups	Protein Group Accessions	Modifications	MH+ [Da]	A2	IonScore A2	Exp Value A2	A4	XCorr A4	# Missed Cleavages
	LAADEDDDDDDEEDDDEDDDDDDFDDEEAEEKAPVKK	3	1	1	10835063;P06748		4246.55				High	7.04518	2
	TVSLGAGAKDELHIVEAEAMNYEGSPIK	6	1	1	10835063;P06748		2929.46				High	6.06142	1
	MSVQPTVSLGGFEITPPVVLR	2	1	1	10835063;P06748	M1(Oxidation)	2243.21				High	5.05762	0
	MSVQPTVSLGGFEITPPVVLR	2	1	1	10835063;P06748		2227.22				High	4.37586	0
	VDNDENEHQLSLR	1	1	1	10835063;P06748		1568.73				High	3.57666	0
	MTDQEAIQDLWQWR	2	1	1	10835063;P06748		1819.84				High	3.42906	0
	TVSLGAGAKDELHIVEAEAMNYEGSPIK	1	1	1	10835063;P06748	M20(Oxidation)	2945.46				High	3.35064	1
	ADKDYHFKVDNDENEHQLSLR	1	1	1	10835063;P06748		2573.2				Low	2.64554	2
Q9BY77	Polymerase delta-interacting protein 3 OS=Homo sapiens GN=POLDIP3 PE=1 SV=2 - [PDIP3_HUMAN]	10.21	1	3	3	4		0			11.6232	10.21	3	4	421	46.0605	9.99365
	Sequence	# PSMs	# Proteins	# Protein Groups	Protein Group Accessions	Modifications	MH+ [Da]	A2	IonScore A2	Exp Value A2	A4	XCorr A4	# Missed Cleavages
	VVQNDAYTAPALPSSIR	1	1	1	29837655;Q9BY77		1801.95				High	3.88133	0
	LVHPGVAEVVFVK	1	1	1	29837655;Q9BY77		1393.82				High	3.27886	0
	VGIQQGLLSQSTR	2	1	1	29837655;Q9BY77		1386.77				Low	2.24663	0
Q06830	Peroxiredoxin-1 OS=Homo sapiens GN=PRDX1 PE=1 SV=1 - [PRDX1_HUMAN]	31.16	1	3	5	8		0			22.4623	31.16	5	8	199	22.0963	8.1333
	Sequence	# PSMs	# Proteins	# Protein Groups	Protein Group Accessions	Modifications	MH+ [Da]	A2	IonScore A2	Exp Value A2	A4	XCorr A4	# Missed Cleavages
	HGEVCPAGWKPGSDTIKPDVQK	2	1	1	4505591;Q06830	C5(Carbamidomethyl)	2406.19				High	4.261	0
	QITVNDLPVGR	2	1	1	4505591;Q06830		1211.67				High	2.64838	0
	TIAQDYGVLK	2	1	1	4505591;Q06830		1107.6				Medium	2.57602	0
	ADEGISFR	1	1	1	4505591;Q06830		894.432				Low	2.11839	0
	ATAVMPDGQFK	1	1	1	4505591;Q06830		1164.57				Low	2.03803	0
P17980	26S protease regulatory subunit 6A OS=Homo sapiens GN=PSMC3 PE=1 SV=3 - [PRS6A_HUMAN]	7.74	1	0	2	4		0			5.66942	7.74	2	2	439	49.1725	5.23682
	Sequence	# PSMs	# Proteins	# Protein Groups	Protein Group Accessions	Modifications	MH+ [Da]	A2	IonScore A2	Exp Value A2	A4	XCorr A4	# Missed Cleavages
	TMLELLNQLDGFQPNTQVK	2	2	2	263098;21361144;P17980		2189.12	High	58.18	0.00242976	High	3.48753	0
	QTYFLPVIGLVDAEK	2	2	2	21361144;P17980;263098		1692.92	Low	32.79	0.658153	Low	2.18188	0
O00232	26S proteasome non-ATPase regulatory subunit 12 OS=Homo sapiens GN=PSMD12 PE=1 SV=3 - [PSD12_HUMAN]	7.89	1	2	2	3		0			11.1226	7.89	2	3	456	52.8706	7.6499
	Sequence	# PSMs	# Proteins	# Protein Groups	Protein Group Accessions	Modifications	MH+ [Da]	A2	IonScore A2	Exp Value A2	A4	XCorr A4	# Missed Cleavages
	LQEVIETLLSLEK	2	1	1	4506221;O00232		1514.87				High	4.23097	0
	MAQLLDLSVDESEAFLSNLVVNK	1	1	1	4506221;O00232		2535.31				High	3.93549	0
P26599	Polypyrimidine tract-binding protein 1 OS=Homo sapiens GN=PTBP1 PE=1 SV=1 - [PTBP1_HUMAN]	11.68	1	2	2	2		0			8.22735	11.68	2	2	531	57.1856	9.17334
	Sequence	# PSMs	# Proteins	# Protein Groups	Protein Group Accessions	Modifications	MH+ [Da]	A2	IonScore A2	Exp Value A2	A4	XCorr A4	# Missed Cleavages
	IAIPGLAGAGNSVLLVSNLNPER	1	1	1	14165466;P26599		2275.28				High	4.2996	0
	AQAALQAVNSVQSGNLALAASAAAVDAGMAMAGQSPVLR	1	1	1	14165466;P26599		3680.89				High	3.92775	0
P22234	Multifunctional protein ADE2 OS=Homo sapiens GN=PAICS PE=1 SV=3 - [PUR6_HUMAN]	20.24	1	0	5	16		0			29.4076	20.24	5	8	425	47.0491	7.2251
	Sequence	# PSMs	# Proteins	# Protein Groups	Protein Group Accessions	Modifications	MH+ [Da]	A2	IonScore A2	Exp Value A2	A4	XCorr A4	# Missed Cleavages
	ITSCIFQLLQEAGIK	6	2	2	5453539;P22234;126030593	C4(Carbamidomethyl)	1720.93	High	95.25	4.16132e-07	High	4.52139	0
	EIVLADVIDNDSWR	4	2	2	5453539;P22234;126030593		1644.82	High	77.89	2.34396e-05	High	3.59011	0
	TKEVYELLDSPGK	2	2	2	5453539;P22234;126030593		1478.77	Medium	51.93	0.0110734	High	2.92764	1
	IKAEYEGDGIPTVFVAVAGR	2	2	2	5453539;P22234;126030593		2092.11	Low	26.11	3.47963	High	3.32935	1
	VELFFKDDANNDPQWSEEQLIAAK	2	2	2	5453539;P22234;126030593		2807.36	Low	17.5	19.7389	High	3.22938	1
Q9H0U4	Ras-related protein Rab-1B OS=Homo sapiens GN=RAB1B PE=1 SV=1 - [RAB1B_HUMAN]	18.91	1	0	3	4		0			10.8705	18.91	3	4	201	22.1572	5.73193
	Sequence	# PSMs	# Proteins	# Protein Groups	Protein Group Accessions	Modifications	MH+ [Da]	A2	IonScore A2	Exp Value A2	A4	XCorr A4	# Missed Cleavages
	EFADSLGIPFLETSAK	2	2	2	13569962;Q9H0U4;193806493;Q92928		1724.88				High	3.79114	0
	LQIWDTAGQER	1	2	2	13569962;Q9H0U4;193806493;Q92928		1316.66				Medium	2.34942	0
	LLLIGDSGVGK	1	2	2	13569962;Q9H0U4;193806493;Q92928		1071.64				Low	2.13283	0
Q92928	Putative Ras-related protein Rab-1C OS=Homo sapiens GN=RAB1C PE=5 SV=2 - [RAB1C_HUMAN]	18.91	1	0	3	4		0			10.8705	18.91	3	4	201	22.003	5.42725
	Sequence	# PSMs	# Proteins	# Protein Groups	Protein Group Accessions	Modifications	MH+ [Da]	A2	IonScore A2	Exp Value A2	A4	XCorr A4	# Missed Cleavages
	EFADSLGIPFLETSAK	2	2	2	13569962;Q9H0U4;193806493;Q92928		1724.88				High	3.79114	0
	LQIWDTAGQER	1	2	2	13569962;Q9H0U4;193806493;Q92928		1316.66				Medium	2.34942	0
	LLLIGDSGVGK	1	2	2	13569962;Q9H0U4;193806493;Q92928		1071.64				Low	2.13283	0
P26373	60S ribosomal protein L13 OS=Homo sapiens GN=RPL13 PE=1 SV=4 - [RL13_HUMAN]	11.37	1	2	2	4		0			10.4015	11.37	2	4	211	24.2465	11.6489
	Sequence	# PSMs	# Proteins	# Protein Groups	Protein Group Accessions	Modifications	MH+ [Da]	A2	IonScore A2	Exp Value A2	A4	XCorr A4	# Missed Cleavages
	STESLQANVQR	2	1	1	15431295;P26373		1232.62				High	3.0082	0
	LATQLTGPVMPVR	1	1	1	15431295;P26373		1382.78				Medium	2.37677	0
	LATQLTGPVMPVR	1	1	1	15431295;P26373	M10(Oxidation)	1398.78				Low	2.30761	0
P50914	60S ribosomal protein L14 OS=Homo sapiens GN=RPL14 PE=1 SV=4 - [RL14_HUMAN]	10.7	1	2	2	4		0			11.7852	10.7	2	4	215	23.417	10.9312
	Sequence	# PSMs	# Proteins	# Protein Groups	Protein Group Accessions	Modifications	MH+ [Da]	A2	IonScore A2	Exp Value A2	A4	XCorr A4	# Missed Cleavages
	ALVDGPCTQVR	2	1	1	78000181;P50914	C7(Carbamidomethyl)	1215.61				High	3.03271	0
	LVAIVDVIDQNR	2	1	1	78000181;P50914		1354.77				High	2.99193	0
Q07020	60S ribosomal protein L18 OS=Homo sapiens GN=RPL18 PE=1 SV=2 - [RL18_HUMAN]	13.83	1	2	2	2		0			4.52659	13.83	2	2	188	21.6211	11.7222
	Sequence	# PSMs	# Proteins	# Protein Groups	Protein Group Accessions	Modifications	MH+ [Da]	A2	IonScore A2	Exp Value A2	A4	XCorr A4	# Missed Cleavages
	TAVVVGTITDDVR	1	1	1	4506607;Q07020		1345.74				Medium	2.37505	0
	ILTFDQLALDSPK	1	1	1	4506607;Q07020		1460.8				Low	2.15154	0
P35268	60S ribosomal protein L22 OS=Homo sapiens GN=RPL22 PE=1 SV=2 - [RL22_HUMAN]	30.47	1	1	2	2		0			6.37077	30.47	2	2	128	14.7778	9.18799
	Sequence	# PSMs	# Proteins	# Protein Groups	Protein Group Accessions	Modifications	MH+ [Da]	A2	IonScore A2	Exp Value A2	A4	XCorr A4	# Missed Cleavages
	FTLDCTHPVEDGIMDAANFEQFLQER	1	1	1	4506613;P35268	C5(Carbamidomethyl)	3083.39				High	4.13282	0
	AGNLGGGVVTIER	1	1	1	4506613;P35268		1242.68				Low	2.23795	0
P39023	60S ribosomal protein L3 OS=Homo sapiens GN=RPL3 PE=1 SV=2 - [RL3_HUMAN]	11.66	1	3	3	6		0			21.1451	11.66	3	6	403	46.0798	10.1841
	Sequence	# PSMs	# Proteins	# Protein Groups	Protein Group Accessions	Modifications	MH+ [Da]	A2	IonScore A2	Exp Value A2	A4	XCorr A4	# Missed Cleavages
	ERLEQQVPVNQVFGQDEMIDVIGVTK	2	1	1	4506649;P39023		2971.52				High	5.28807	1
	HGSLGFLPR	2	1	1	4506649;P39023		983.544				High	2.95345	0
	NNASTDYDLSDK	2	1	1	4506649;P39023		1342.58				High	2.75305	0
P36578	60S ribosomal protein L4 OS=Homo sapiens GN=RPL4 PE=1 SV=5 - [RL4_HUMAN]	20.37	1	3	6	6		0			15.2615	20.37	6	6	427	47.6674	11.063
	Sequence	# PSMs	# Proteins	# Protein Groups	Protein Group Accessions	Modifications	MH+ [Da]	A2	IonScore A2	Exp Value A2	A4	XCorr A4	# Missed Cleavages
	APIRPDIVNFVHTNLR	1	1	1	16579885;P36578		1862.04				High	3.12015	0
	QPYAVSELAGHQTSAESWGTGR	1	1	1	16579885;P36578		2332.1				High	3.07697	0
	IEEVPELPLVVEDKVEGYKK	1	1	1	16579885;P36578		2313.26				Low	2.71274	2
	SGQGAFGNMCR	1	1	1	16579885;P36578	C10(Carbamidomethyl)	1184.49				Low	2.16134	0
	MINTDLSR	1	1	1	16579885;P36578		949.477				Low	2.16032	0
	KLDELYGTWR	1	1	1	16579885;P36578		1280.66				Low	2.03002	1
P46777	60S ribosomal protein L5 OS=Homo sapiens GN=RPL5 PE=1 SV=3 - [RL5_HUMAN]	17.85	1	4	4	4		0			12.4592	17.85	4	4	297	34.3407	9.71533
	Sequence	# PSMs	# Proteins	# Protein Groups	Protein Group Accessions	Modifications	MH+ [Da]	A2	IonScore A2	Exp Value A2	A4	XCorr A4	# Missed Cleavages
	GAVDGGLSIPHSTK	1	1	1	14591909;P46777		1338.7				High	3.53747	0
	YLMEEDEDAYKK	1	1	1	14591909;P46777	M3(Oxidation)	1549.67				High	3.11734	1
	IEGDMIVCAAYAHELPK	1	1	1	14591909;P46777	C8(Carbamidomethyl)	1916.92				Medium	3.05921	0
	DIICQIAYAR	1	1	1	14591909;P46777	C4(Carbamidomethyl)	1222.62				High	2.74514	0
Q02878	60S ribosomal protein L6 OS=Homo sapiens GN=RPL6 PE=1 SV=3 - [RL6_HUMAN]	12.15	1	1	2	2		0			5.10906	12.15	2	2	288	32.7076	10.5796
	Sequence	# PSMs	# Proteins	# Protein Groups	Protein Group Accessions	Modifications	MH+ [Da]	A2	IonScore A2	Exp Value A2	A4	XCorr A4	# Missed Cleavages
	HQEGEIFDTEKEKYEITEQR	1	1	1	16753227;Q02878		2509.18				Low	2.89078	2
	ASITPGTILIILTGR	1	1	1	16753227;Q02878		1525.93				Low	2.21828	0
P62424	60S ribosomal protein L7a OS=Homo sapiens GN=RPL7A PE=1 SV=2 - [RL7A_HUMAN]	15.04	1	3	3	8		0			22.4791	15.04	3	8	266	29.977	10.6089
	Sequence	# PSMs	# Proteins	# Protein Groups	Protein Group Accessions	Modifications	MH+ [Da]	A2	IonScore A2	Exp Value A2	A4	XCorr A4	# Missed Cleavages
	LKVPPAINQFTQALDR	2	1	1	4506661;P62424		1811.02				High	3.70173	1
	AGVNTVTTLVENK	4	1	1	4506661;P62424		1345.73				High	3.10364	0
	NFGIGQDIQPK	2	1	1	4506661;P62424		1216.63				Medium	2.36693	0
P18124	60S ribosomal protein L7 OS=Homo sapiens GN=RPL7 PE=1 SV=1 - [RL7_HUMAN]	12.1	1	2	2	4		0			12.3364	12.1	2	4	248	29.2072	10.6528
	Sequence	# PSMs	# Proteins	# Protein Groups	Protein Group Accessions	Modifications	MH+ [Da]	A2	IonScore A2	Exp Value A2	A4	XCorr A4	# Missed Cleavages
	TTHFVEGGDAGNREDQINR	2	1	1	15431301;P18124		2115.98				High	3.77132	1
	IALTDNALIAR	2	1	1	15431301;P18124		1170.69				High	2.65268	0
P05388	60S acidic ribosomal protein P0 OS=Homo sapiens GN=RPLP0 PE=1 SV=1 - [RLA0_HUMAN]	24.61	1	5	6	10		0			27.8285	24.61	6	10	317	34.2518	5.97314
	Sequence	# PSMs	# Proteins	# Protein Groups	Protein Group Accessions	Modifications	MH+ [Da]	A2	IonScore A2	Exp Value A2	A4	XCorr A4	# Missed Cleavages
	AGAIAPCEVTVPAQNTGLGPEK	2	1	1	4506667;P05388	C7(Carbamidomethyl)	2180.1				High	4.03299	0
	IIQLLDDYPK	2	1	1	4506667;P05388		1217.68				High	3.00817	0
	TSFFQALGITTK	2	1	1	4506667;P05388		1313.71				High	2.87754	0
	GTIEILSDVQLIK	2	1	1	4506667;P05388		1428.83				High	2.84728	0
	CFIVGADNVGSK	1	1	1	4506667;P05388	C1(Carbamidomethyl)	1266.61				Medium	2.54727	0
	GNVGFVFTK	1	1	1	4506667;P05388		968.52				Low	2.1213	0
P05387	60S acidic ribosomal protein P2 OS=Homo sapiens GN=RPLP2 PE=1 SV=1 - [RLA2_HUMAN]	25.22	1	0	3	8		0			9.3298	25.22	2	3	115	11.6578	4.53857
	Sequence	# PSMs	# Proteins	# Protein Groups	Protein Group Accessions	Modifications	MH+ [Da]	A2	IonScore A2	Exp Value A2	A4	XCorr A4	# Missed Cleavages
	NIEDVIAQGIGK	4	2	2	4506671;P05387;268612104		1256.68	High	73.77	5.995e-05	High	3.07854	0
	KILDSVGIEADDDRLNK	2	2	2	4506671;P05387;268612104		1901	Low	27.5	2.91878	High	3.43891	2
	ILDSVGIEADDDRLNK	2	2	2	268612104;4506671;P05387		1772.9	Low	22.8	8.02378			1
P09651	Heterogeneous nuclear ribonucleoprotein A1 OS=Homo sapiens GN=HNRNPA1 PE=1 SV=5 - [ROA1_HUMAN]	16.67	1	4	4	5		0			16.7826	16.67	4	5	372	38.7231	9.12939
	Sequence	# PSMs	# Proteins	# Protein Groups	Protein Group Accessions	Modifications	MH+ [Da]	A2	IonScore A2	Exp Value A2	A4	XCorr A4	# Missed Cleavages
	GFAFVTFDDHDSVDKIVIQK	1	1	1	14043070;P09651		2281.15				High	3.69644	1
	SSGPYGGGGQYFAKPR	2	1	1	14043070;P09651		1628.78				High	3.62994	0
	LFIGGLSFETTDESLR	1	1	1	14043070;P09651		1784.91				High	3.57857	0
	IEVIEIMTDR	1	1	1	14043070;P09651		1218.64				Medium	2.45222	0
P22626	Heterogeneous nuclear ribonucleoproteins A2/B1 OS=Homo sapiens GN=HNRNPA2B1 PE=1 SV=2 - [ROA2_HUMAN]	14.16	1	3	4	6		0			16.4026	14.16	4	6	353	37.4067	8.95361
	Sequence	# PSMs	# Proteins	# Protein Groups	Protein Group Accessions	Modifications	MH+ [Da]	A2	IonScore A2	Exp Value A2	A4	XCorr A4	# Missed Cleavages
	LFIGGLSFETTEESLR	2	1	1	14043072;P22626		1798.92				High	3.81394	0
	GGGGNFGPGPGSNFR	2	1	1	14043072;P22626		1377.63				Medium	2.38989	0
	GGNFGFGDSR	1	1	1	14043072;P22626		1013.44				Low	2.2516	0
	TLETVPLER	1	1	1	14043072;P22626		1057.59				Low	2.16851	0
P62847	40S ribosomal protein S24 OS=Homo sapiens GN=RPS24 PE=1 SV=1 - [RS24_HUMAN]	20.3	1	2	2	3		0			7.31631	20.3	2	3	133	15.4134	10.7847
	Sequence	# PSMs	# Proteins	# Protein Groups	Protein Group Accessions	Modifications	MH+ [Da]	A2	IonScore A2	Exp Value A2	A4	XCorr A4	# Missed Cleavages
	TTGFGMIYDSLDYAK	1	1	1	4506703;P62847		1681.78				High	2.75431	0
	TTPDVIFVFGFR	2	1	1	4506703;P62847		1398.74				Medium	2.38171	0
P15880	40S ribosomal protein S2 OS=Homo sapiens GN=RPS2 PE=1 SV=2 - [RS2_HUMAN]	15.36	1	3	4	5		0			13.3077	15.36	4	5	293	31.3046	10.2427
	Sequence	# PSMs	# Proteins	# Protein Groups	Protein Group Accessions	Modifications	MH+ [Da]	A2	IonScore A2	Exp Value A2	A4	XCorr A4	# Missed Cleavages
	SPYQEFTDHLVK	2	1	1	15055539;P15880		1463.72				High	3.3255	0
	TYSYLTPDLWK	1	1	1	15055539;P15880		1386.7				High	2.99179	0
	GTGIVSAPVPK	1	1	1	15055539;P15880		1025.6				Low	2.22439	0
	GCTATLGNFAK	1	1	1	15055539;P15880	C2(Carbamidomethyl)	1139.55				Low	2.1899	0
P62753	40S ribosomal protein S6 OS=Homo sapiens GN=RPS6 PE=1 SV=1 - [RS6_HUMAN]	15.66	1	3	3	5		0			13.9962	15.66	3	5	249	28.663	10.8433
	Sequence	# PSMs	# Proteins	# Protein Groups	Protein Group Accessions	Modifications	MH+ [Da]	A2	IonScore A2	Exp Value A2	A4	XCorr A4	# Missed Cleavages
	KGEKDIPGLTDTTVPR	1	1	1	6677809;P62753		1726.93				High	4.03218	2
	MATEVAADALGEEWK	2	1	1	6677809;P62753		1620.76				High	3.01001	0
	LIEVDDER	2	1	1	6677809;P62753		988.494				Low	2.10115	0
P08865	40S ribosomal protein SA OS=Homo sapiens GN=RPSA PE=1 SV=4 - [RSSA_HUMAN]	16.61	1	0	4	14		0			17.9089	16.61	4	6	295	32.8334	4.86865
	Sequence	# PSMs	# Proteins	# Protein Groups	Protein Group Accessions	Modifications	MH+ [Da]	A2	IonScore A2	Exp Value A2	A4	XCorr A4	# Missed Cleavages
	AIVAIENPADVSVISSR	4	2	2	9845502;P08865;161761214		1740.95	High	99.06	1.54902e-07	High	4.10521	0
	FAAATGATPIAGR	4	2	2	9845502;P08865;161761214		1203.65	High	75.73	5.28707e-05	High	3.35908	0
	LLVVTDPR	3	2	2	161761214;9845502;P08865		912.552	Medium	40.89	0.0307144	Low	2.14152	0
	YVDIAIPCNNK	3	2	2	9845502;P08865;161761214	C8(Carbamidomethyl)	1306.65	Low	28.82	1.50431	Low	2.22876	0
Q15019	Septin-2 OS=Homo sapiens GN=SEPT2 PE=1 SV=1 - [SEPT2_HUMAN]	7.76	1	0	2	4		0			4.74027	7.76	2	2	361	41.4613	6.59521
	Sequence	# PSMs	# Proteins	# Protein Groups	Protein Group Accessions	Modifications	MH+ [Da]	A2	IonScore A2	Exp Value A2	A4	XCorr A4	# Missed Cleavages
	TIISYIDEQFER	2	3	3	4758158;Q15019;1040689;157836014		1513.75	Low	36.47	0.289185	Medium	2.34318	0
	STLINSLFLTDLYPER	2	3	3	4758158;Q15019;1040689;157836014		1882	Low	23.08	6.98499	Medium	2.39709	0
O43175	D-3-phosphoglycerate dehydrogenase OS=Homo sapiens GN=PHGDH PE=1 SV=4 - [SERA_HUMAN]	24.58	1	8	9	19		0			64.6387	24.58	9	19	533	56.6144	6.7124
	Sequence	# PSMs	# Proteins	# Protein Groups	Protein Group Accessions	Modifications	MH+ [Da]	A2	IonScore A2	Exp Value A2	A4	XCorr A4	# Missed Cleavages
	TQTSDPAMLPTMIGLLAEAGVR	6	1	1	23308577;O43175		2272.16				High	4.86228	0
	NAGNCLSPAVIVGLLK	1	1	1	23308577;O43175	C5(Carbamidomethyl)	1625.91				High	3.8863	0
	ILQDGGLQVVEK	2	1	1	23308577;O43175		1298.73				High	3.27601	0
	ALQSGQCAGAALDVFTEEPPRDR	2	1	1	23308577;O43175	C7(Carbamidomethyl)	2488.19				High	3.10724	1
	GTIQVITQGTSLK	2	1	1	23308577;O43175		1345.77				High	2.98489	0
	AGTGVDNVDLEAATR	2	1	1	23308577;O43175		1488.73				High	2.93655	0
	VTADVINAAEK	1	1	1	23308577;O43175		1130.6				Medium	2.57218	0
	TLGILGLGR	2	1	1	23308577;O43175		899.567				Medium	2.38578	0
	QADVNLVNAK	1	1	1	23308577;O43175		1071.58				Low	2.28313	0
P14868	Aspartate--tRNA ligase, cytoplasmic OS=Homo sapiens GN=DARS PE=1 SV=2 - [SYDC_HUMAN]	5.99	1	1	2	2		0			5.53915	5.99	2	2	501	57.1	6.55127
	Sequence	# PSMs	# Proteins	# Protein Groups	Protein Group Accessions	Modifications	MH+ [Da]	A2	IonScore A2	Exp Value A2	A4	XCorr A4	# Missed Cleavages
	LPLQLDDAVRPEAEGEEEGR	1	1	1	45439306;P14868		2223.09				High	3.37395	0
	FQTEIQTVNK	1	1	1	45439306;P14868		1207.63				Low	2.1652	0
P17987	T-complex protein 1 subunit alpha OS=Homo sapiens GN=TCP1 PE=1 SV=1 - [TCPA_HUMAN]	30.04	1	7	9	15		0			59.071	30.04	9	15	556	60.3056	6.11279
	Sequence	# PSMs	# Proteins	# Protein Groups	Protein Group Accessions	Modifications	MH+ [Da]	A2	IonScore A2	Exp Value A2	A4	XCorr A4	# Missed Cleavages
	ASGATILSTLANLEGEETFEAAMLGQAEEVVQER	3	1	1	57863257;P17987		3564.73				High	5.44812	0
	MLVDDIGDVTITNDGATILK	1	1	1	57863257;P17987		2104.09				High	5.40395	0
	ASGATILSTLANLEGEETFEAAMLGQAEEVVQER	1	1	1	57863257;P17987	M23(Oxidation)	3580.74				High	5.28886	0
	YINENLIVNTDELGR	1	1	1	57863257;P17987		1762.9				High	4.54198	0
	SLLVIPNTLAVNAAQDSTDLVAK	3	1	1	57863257;P17987		2353.3				High	4.38779	0
	VLCELADLQDKEVGDGTTSVVIIAAELLK	2	1	1	57863257;P17987	C3(Carbamidomethyl)	3099.65				High	4.36344	1
	SQNVMAAASIANIVK	1	1	1	57863257;P17987		1516.82				High	2.74233	0
	EQLAIAEFAR	1	1	1	57863257;P17987		1147.61				Low	2.17565	0
	QAGVFEPTIVK	1	1	1	57863257;P17987		1188.66				Low	2.03367	0
	YPVNSVNILK	1	1	1	57863257;P17987		1146.65				Low	2.02456	0
P78371	T-complex protein 1 subunit beta OS=Homo sapiens GN=CCT2 PE=1 SV=4 - [TCPB_HUMAN]	31.4	1	9	9	19		0			73.0581	31.4	9	19	535	57.4521	6.45557
	Sequence	# PSMs	# Proteins	# Protein Groups	Protein Group Accessions	Modifications	MH+ [Da]	A2	IonScore A2	Exp Value A2	A4	XCorr A4	# Missed Cleavages
	MLPTIIADNAGYDSADLVAQLR	4	1	1	5453603;P78371		2347.2				High	5.04291	0
	EGTIGDMAILGITESFQVK	2	1	1	5453603;P78371		2009.03				High	5.03466	0
	VQDDEVGDGTTSVTVLAAELLR	3	1	1	5453603;P78371		2288.17				High	4.9718	0
	LGGSLADSYLDEGFLLDKK	2	1	1	5453603;P78371		2041.05				High	4.65092	1
	QLIYNYPEQLFGAAGVMAIEHADFAGVER	1	1	1	5453603;P78371		3209.58				High	4.00162	0
	GATQQILDEAER	2	1	1	5453603;P78371		1330.66				High	3.28178	0
	LTSFIGAIAIGDLVK	2	1	1	5453603;P78371		1517.9				High	3.27644	0
	QVLLSAAEAAEVILR	2	1	1	5453603;P78371		1582.92				High	3.13747	0
	DASLMVTNDGATILK	1	1	1	5453603;P78371		1548.79				Medium	2.48722	0
P50991	T-complex protein 1 subunit delta OS=Homo sapiens GN=CCT4 PE=1 SV=4 - [TCPD_HUMAN]	9.83	1	4	4	7		0			19.6961	9.83	4	7	539	57.8878	7.82568
	Sequence	# PSMs	# Proteins	# Protein Groups	Protein Group Accessions	Modifications	MH+ [Da]	A2	IonScore A2	Exp Value A2	A4	XCorr A4	# Missed Cleavages
	DALSDLALHFLNK	2	1	1	38455427;P50991		1456.78				High	3.89637	0
	ALIAGGGAPEIELALR	2	1	1	38455427;P50991		1550.89				High	3.35193	0
	TLSGMESYCVR	1	1	1	38455427;P50991	C9(Carbamidomethyl)	1302.58				Medium	2.44176	0
	VIDPATATSVDLR	2	1	1	38455427;P50991		1357.73				Low	2.32305	0
P48643	T-complex protein 1 subunit epsilon OS=Homo sapiens GN=CCT5 PE=1 SV=1 - [TCPE_HUMAN]	18.67	1	5	5	8		0			27.72	18.67	5	8	541	59.6328	5.65576
	Sequence	# PSMs	# Proteins	# Protein Groups	Protein Group Accessions	Modifications	MH+ [Da]	A2	IonScore A2	Exp Value A2	A4	XCorr A4	# Missed Cleavages
	ETGANLAICQWGFDDEANHLLLQNNLPAVR	2	1	1	24307939;P48643	C9(Carbamidomethyl)	3379.65				High	4.47013	0
	WVGGPEIELIAIATGGR	2	1	1	24307939;P48643		1738.95				High	4.29708	0
	VAIEHLDKISDSVLVDIKDTEPLIQTAK	1	1	1	24307939;P48643		3090.7				High	3.65987	2
	LGFAGLVQEISFGTTK	1	1	1	24307939;P48643		1667.9				High	3.53786	0
	IADGYEQAAR	2	1	1	24307939;P48643		1093.53				High	2.61091	0
P49368	T-complex protein 1 subunit gamma OS=Homo sapiens GN=CCT3 PE=1 SV=4 - [TCPG_HUMAN]	24.22	1	6	8	9		0			23.2924	24.22	8	9	545	60.4953	6.49365
	Sequence	# PSMs	# Proteins	# Protein Groups	Protein Group Accessions	Modifications	MH+ [Da]	A2	IonScore A2	Exp Value A2	A4	XCorr A4	# Missed Cleavages
	WSSLACNIALDAVK	1	1	1	63162572;P49368	C6(Carbamidomethyl)	1547.79				High	3.31893	0
	NVLLDPQLVPGGGASEMAVAHALTEK	1	1	1	63162572;P49368		2617.36				High	3.2163	0
	IVSRPEELREDDVGTGAGLLEIK	1	1	1	63162572;P49368		2496.33				Low	2.75034	1
	TLIQNCGASTIR	1	1	1	63162572;P49368	C6(Carbamidomethyl)	1333.69				High	2.74459	0
	TAVETAVLLLR	2	1	1	63162572;P49368		1185.72				Medium	2.5788	0
	AVAQALEVIPR	1	1	1	63162572;P49368		1166.69				Medium	2.36137	0
	ELGIWEPLAVK	1	1	1	63162572;P49368		1254.71				Low	2.11788	0
	ISIPVDISDSDMMLNIINSSITTK	1	1	1	63162572;P49368		2607.33				Low	2.01797	0
Q99832	T-complex protein 1 subunit eta OS=Homo sapiens GN=CCT7 PE=1 SV=2 - [TCPH_HUMAN]	16.39	1	6	6	17		0			60.0127	16.39	6	17	543	59.3289	7.6499
	Sequence	# PSMs	# Proteins	# Protein Groups	Protein Group Accessions	Modifications	MH+ [Da]	A2	IonScore A2	Exp Value A2	A4	XCorr A4	# Missed Cleavages
	INALTAASEAACLIVSVDETIKNPR	4	1	1	5453607;Q99832	C12(Carbamidomethyl)	2656.4				High	4.75798	1
	SQDAEVGDGTTSVTLLAAEFLK	3	1	1	5453607;Q99832		2252.13				High	4.67046	0
	INALTAASEAACLIVSVDETIK	2	1	1	5453607;Q99832	C12(Carbamidomethyl)	2289.2				High	4.43809	0
	MVVDAVMMLDDLLQLK	4	1	1	5453607;Q99832		1833.95				High	4.10285	0
	MVVDAVMMLDDLLQLK	1	1	1	5453607;Q99832	M1(Oxidation)	1849.95				High	3.70882	0
	GGAEQFMEETER	2	1	1	5453607;Q99832		1383.58				High	2.63391	0
	LPIGDVATQYFADR	1	1	1	5453607;Q99832		1565.8				Medium	2.55774	0
P50990	T-complex protein 1 subunit theta OS=Homo sapiens GN=CCT8 PE=1 SV=4 - [TCPQ_HUMAN]	15.15	1	7	7	12		0			33.9672	15.15	7	12	548	59.5825	5.60498
	Sequence	# PSMs	# Proteins	# Protein Groups	Protein Group Accessions	Modifications	MH+ [Da]	A2	IonScore A2	Exp Value A2	A4	XCorr A4	# Missed Cleavages
	DMLEAGILDTYLGK	1	1	1	48762932;P50990		1538.78				High	3.6958	0
	AIADTGANVVVTGGK	2	1	1	48762932;P50990		1372.74				High	3.63549	0
	LFVTNDAATILR	2	1	1	48762932;P50990		1333.75				High	2.94647	0
	LATNAAVTVLR	2	1	1	48762932;P50990		1128.67				High	2.79939	0
	APGFAQMLK	2	1	1	48762932;P50990		962.511				High	2.78343	0
	FAEAFEAIPR	2	1	1	48762932;P50990		1150.59				Medium	2.5654	0
	GSTDNLMDDIER	1	1	1	48762932;P50990		1365.59				Low	2.09189	0
P40227	T-complex protein 1 subunit zeta OS=Homo sapiens GN=CCT6A PE=1 SV=3 - [TCPZ_HUMAN]	28.06	1	9	9	20		0			68.3799	28.06	9	20	531	57.9876	6.68311
	Sequence	# PSMs	# Proteins	# Protein Groups	Protein Group Accessions	Modifications	MH+ [Da]	A2	IonScore A2	Exp Value A2	A4	XCorr A4	# Missed Cleavages
	DGNVLLHEMQIQHPTASLIAK	2	1	1	4502643;P40227		2315.22				High	4.25943	0
	VLAQNSGFDLQETLVK	2	1	1	4502643;P40227		1761.94				High	4.22318	0
	AQLGVQAFADALLIIPK	2	1	1	4502643;P40227		1768.04				High	4.07964	0
	NAIDDGCVVPGAGAVEVAMAEALIK	5	1	1	4502643;P40227	C7(Carbamidomethyl)	2470.23				High	4.00229	0
	VATAQDDITGDGTTSNVLIIGELLK	3	1	1	4502643;P40227		2544.34				High	3.97636	0
	VHAELADVLTEAVVDSILAIK	3	1	1	4502643;P40227		2206.24				High	3.81897	0
	TKVHAELADVLTEAVVDSILAIK	1	1	1	4502643;P40227		2435.38				High	3.08646	1
	MLVSGAGDIK	1	1	1	4502643;P40227		990.528				Medium	2.35191	0
	GIDPFSLDALSK	1	1	1	4502643;P40227		1262.66				Low	2.12135	0
Q86V81	THO complex subunit 4 OS=Homo sapiens GN=ALYREF PE=1 SV=3 - [THOC4_HUMAN]	11.28	1	2	2	3		0			10.2532	11.28	2	3	257	26.8716	11.1509
	Sequence	# PSMs	# Proteins	# Protein Groups	Protein Group Accessions	Modifications	MH+ [Da]	A2	IonScore A2	Exp Value A2	A4	XCorr A4	# Missed Cleavages
	QQLSAEELDAQLDAYNAR	2	1	1	48429165;Q86V81		2034.97				High	4.86491	0
	SLGTADVHFER	1	1	1	48429165;Q86V81		1231.61				Medium	2.39404	0
P08670	Vimentin OS=Homo sapiens GN=VIM PE=1 SV=4 - [VIME_HUMAN]	10.09	1	3	3	5		0			17.3105	10.09	3	5	466	53.6191	5.12256
	Sequence	# PSMs	# Proteins	# Protein Groups	Protein Group Accessions	Modifications	MH+ [Da]	A2	IonScore A2	Exp Value A2	A4	XCorr A4	# Missed Cleavages
	LLQDSVDFSLADAINTEFK	2	1	1	62414289;P08670		2126.07				High	4.32403	0
	KVESLQEEIAFLKK	1	1	1	62414289;P08670		1661.95				High	3.31399	2
	SLYASSPGGVYATR	2	1	1	62414289;P08670		1428.72				High	3.05441	0
P13010	X-ray repair cross-complementing protein 5 OS=Homo sapiens GN=XRCC5 PE=1 SV=3 - [XRCC5_HUMAN]	15.3	1	5	5	6		0			20.8622	15.3	5	6	732	82.6523	5.80811
	Sequence	# PSMs	# Proteins	# Protein Groups	Protein Group Accessions	Modifications	MH+ [Da]	A2	IonScore A2	Exp Value A2	A4	XCorr A4	# Missed Cleavages
	YAPTEAQLNAVDALIDSMSLAK	1	1	1	10863945;P13010		2321.17				High	4.72166	0
	DDEAAAVALSSLIHALDDLDMVAIVR	1	1	1	10863945;P13010	M21(Oxidation)	2739.39				High	3.8444	0
	HLMLPDFDLLEDIESK	2	1	1	10863945;P13010		1914.95				High	3.50011	0
	ETVYCLNDDDETEVLKEDIIQGFR	1	1	1	10863945;P13010	C5(Carbamidomethyl)	2901.35				High	3.36962	1
	DKPSGDTAAVFEEGGDVDDLLDMI	1	1	1	10863945;P13010		2509.13				Medium	2.53038	0
P12956	X-ray repair cross-complementing protein 6 OS=Homo sapiens GN=XRCC6 PE=1 SV=2 - [XRCC6_HUMAN]	26.11	1	10	11	30		0			107.124	26.11	11	30	609	69.7991	6.63916
	Sequence	# PSMs	# Proteins	# Protein Groups	Protein Group Accessions	Modifications	MH+ [Da]	A2	IonScore A2	Exp Value A2	A4	XCorr A4	# Missed Cleavages
	NLEALALDLMEPEQAVDLTLPK	4	1	1	4503841;P12956	M10(Oxidation)	2439.27				High	5.44395	0
	NLEALALDLMEPEQAVDLTLPK	10	1	1	4503841;P12956		2423.27				High	4.71759	0
	LGSLVDEFKELVYPPDYNPEGK	1	1	1	4503841;P12956		2509.25				High	3.49066	1
	QIILEKEETEELKR	2	1	1	4503841;P12956		1757.96				High	3.48227	2
	IISSDRDLLAVVFYGTEK	1	1	1	4503841;P12956		2026.09				High	3.4516	1
	NIYVLQELDNPGAK	1	1	1	4503841;P12956		1573.82				High	3.38081	0
	SDSFENPVLQQHFR	2	1	1	4503841;P12956		1703.81				High	3.28294	0
	DSLIFLVDASK	2	1	1	4503841;P12956		1207.66				High	3.26159	0
	DTGIFLDLMHLK	2	1	1	4503841;P12956		1402.74				High	3.22617	0
	DIISIAEDEDLR	1	1	1	4503841;P12956		1388.69				High	2.64461	0
	KQELLEALTK	2	1	1	4503841;P12956		1172.69				Medium	2.57945	1
	IMATPEQVGK	2	1	1	4503841;P12956		1073.57				Low	2.28761	0
P60174	Triosephosphate isomerase OS=Homo sapiens GN=TPI1 PE=1 SV=3 - [TPIS_HUMAN]	24.48	1	0	5	16		0			25.5817	24.48	5	8	286	30.7717	5.92236
	Sequence	# PSMs	# Proteins	# Protein Groups	Protein Group Accessions	Modifications	MH+ [Da]	A2	IonScore A2	Exp Value A2	A4	XCorr A4	# Missed Cleavages
	SNVSDAVAQSTR	4	4	4	226529917;P60174;999892;66360365;190613420		1234.6	High	80.42	1.04758e-05	High	3.33416	0
	IIYGGSVTGATCK	2	4	4	226529917;P60174;999892;66360365;190613420	C12(Carbamidomethyl)	1326.67	High	67.1	0.000246938	High	2.88214	0
	VPADTEVVCAPPTAYIDFAR	2	4	4	226529917;P60174;999892;66360365;190613420	C9(Carbamidomethyl)	2192.07	High	62.26	0.000764676	High	4.86231	0
	VVLAYEPVWAIGTGK	4	4	4	999892;66360365;190613420;226529917;P60174		1602.89	High	61.73	0.000842744	High	3.18025	0
	IAVAAQNCYK	4	4	4	226529917;P60174;999892;66360365;190613420	C8(Carbamidomethyl)	1137.57	Low	41.19	0.100549	High	2.62461	0
P0CG48	Polyubiquitin-C OS=Homo sapiens GN=UBC PE=1 SV=3 - [UBC_HUMAN]	32.85	1	2	2	5		0			14.1742	32.85	2	5	685	76.9915	7.66455
	Sequence	# PSMs	# Proteins	# Protein Groups	Protein Group Accessions	Modifications	MH+ [Da]	A2	IonScore A2	Exp Value A2	A4	XCorr A4	# Missed Cleavages
	TITLEVEPSDTIENVK	3	1	1	391358178;P0CG48		1787.93				High	3.26576	0
	ESTLHLVLR	2	1	1	391358178;P0CG48		1067.62				Medium	2.53696	0

## Sheet: Sheet3
SN	protein name
Q9UHB7	AF4/FMR2 family member 4 OS=Homo sapiens GN=AFF4 PE=1 SV=1 - [AFF4_HUMAN]
O00232	26S proteasome non-ATPase regulatory subunit 12 OS=Homo sapiens GN=PSMD12 PE=1 SV=3 - [PSD12_HUMAN]
O43175	D-3-phosphoglycerate dehydrogenase OS=Homo sapiens GN=PHGDH PE=1 SV=4 - [SERA_HUMAN]
O60563	Cyclin-T1 OS=Homo sapiens GN=CCNT1 PE=1 SV=1 - [CCNT1_HUMAN]
O60814	Histone H2B type 1-K OS=Homo sapiens GN=HIST1H2BK PE=1 SV=3 - [H2B1K_HUMAN]
O95260	Arginyl-tRNA--protein transferase 1 OS=Homo sapiens GN=ATE1 PE=1 SV=2 - [ATE1_HUMAN]
P00338	L-lactate dehydrogenase A chain OS=Homo sapiens GN=LDHA PE=1 SV=2 - [LDHA_HUMAN]
P02533	Keratin, type I cytoskeletal 14 OS=Homo sapiens GN=KRT14 PE=1 SV=4 - [K1C14_HUMAN]
P04075	Fructose-bisphosphate aldolase A OS=Homo sapiens GN=ALDOA PE=1 SV=2 - [ALDOA_HUMAN]
P04259	Keratin, type II cytoskeletal 6B OS=Homo sapiens GN=KRT6B PE=1 SV=5 - [K2C6B_HUMAN]
P04264	Keratin, type II cytoskeletal 1 OS=Homo sapiens GN=KRT1 PE=1 SV=6 - [K2C1_HUMAN]
P04406	Glyceraldehyde-3-phosphate dehydrogenase OS=Homo sapiens GN=GAPDH PE=1 SV=3 - [G3P_HUMAN]
P05387	60S acidic ribosomal protein P2 OS=Homo sapiens GN=RPLP2 PE=1 SV=1 - [RLA2_HUMAN]
P05388	60S acidic ribosomal protein P0 OS=Homo sapiens GN=RPLP0 PE=1 SV=1 - [RLA0_HUMAN]
P05455	Lupus La protein OS=Homo sapiens GN=SSB PE=1 SV=2 - [LA_HUMAN]
P06280	Alpha-galactosidase A OS=Homo sapiens GN=GLA PE=1 SV=1 - [AGAL_HUMAN]
P06576	ATP synthase subunit beta, mitochondrial OS=Homo sapiens GN=ATP5B PE=1 SV=3 - [ATPB_HUMAN]
P06733	Alpha-enolase OS=Homo sapiens GN=ENO1 PE=1 SV=2 - [ENOA_HUMAN]
P06748	Nucleophosmin OS=Homo sapiens GN=NPM1 PE=1 SV=2 - [NPM_HUMAN]
P07195	L-lactate dehydrogenase B chain OS=Homo sapiens GN=LDHB PE=1 SV=2 - [LDHB_HUMAN]
P07900	Heat shock protein HSP 90-alpha OS=Homo sapiens GN=HSP90AA1 PE=1 SV=5 - [HS90A_HUMAN]
P07910	Heterogeneous nuclear ribonucleoproteins C1/C2 OS=Homo sapiens GN=HNRNPC PE=1 SV=4 - [HNRPC_HUMAN]
P08107	Heat shock 70 kDa protein 1A/1B OS=Homo sapiens GN=HSPA1A PE=1 SV=5 - [HSP71_HUMAN]
P08670	Vimentin OS=Homo sapiens GN=VIM PE=1 SV=4 - [VIME_HUMAN]
P08865	40S ribosomal protein SA OS=Homo sapiens GN=RPSA PE=1 SV=4 - [RSSA_HUMAN]
P09651	Heterogeneous nuclear ribonucleoprotein A1 OS=Homo sapiens GN=HNRNPA1 PE=1 SV=5 - [ROA1_HUMAN]
P09972	Fructose-bisphosphate aldolase C OS=Homo sapiens GN=ALDOC PE=1 SV=2 - [ALDOC_HUMAN]
P0CG48	Polyubiquitin-C OS=Homo sapiens GN=UBC PE=1 SV=3 - [UBC_HUMAN]
P10412	Histone H1.4 OS=Homo sapiens GN=HIST1H1E PE=1 SV=2 - [H14_HUMAN]
P10809	60 kDa heat shock protein, mitochondrial OS=Homo sapiens GN=HSPD1 PE=1 SV=2 - [CH60_HUMAN]
P11021	78 kDa glucose-regulated protein OS=Homo sapiens GN=HSPA5 PE=1 SV=2 - [GRP78_HUMAN]
P12268	Inosine-5'-monophosphate dehydrogenase 2 OS=Homo sapiens GN=IMPDH2 PE=1 SV=2 - [IMDH2_HUMAN]
P12277	Creatine kinase B-type OS=Homo sapiens GN=CKB PE=1 SV=1 - [KCRB_HUMAN]
P12956	X-ray repair cross-complementing protein 6 OS=Homo sapiens GN=XRCC6 PE=1 SV=2 - [XRCC6_HUMAN]
P13010	X-ray repair cross-complementing protein 5 OS=Homo sapiens GN=XRCC5 PE=1 SV=3 - [XRCC5_HUMAN]
P13645	Keratin, type I cytoskeletal 10 OS=Homo sapiens GN=KRT10 PE=1 SV=6 - [K1C10_HUMAN]
P14618	Pyruvate kinase isozymes M1/M2 OS=Homo sapiens GN=PKM PE=1 SV=4 - [KPYM_HUMAN]
P14868	Aspartate--tRNA ligase, cytoplasmic OS=Homo sapiens GN=DARS PE=1 SV=2 - [SYDC_HUMAN]
P15880	40S ribosomal protein S2 OS=Homo sapiens GN=RPS2 PE=1 SV=2 - [RS2_HUMAN]
P16402	Histone H1.3 OS=Homo sapiens GN=HIST1H1D PE=1 SV=2 - [H13_HUMAN]
P16403	Histone H1.2 OS=Homo sapiens GN=HIST1H1C PE=1 SV=2 - [H12_HUMAN]
P17980	26S protease regulatory subunit 6A OS=Homo sapiens GN=PSMC3 PE=1 SV=3 - [PRS6A_HUMAN]
P17987	T-complex protein 1 subunit alpha OS=Homo sapiens GN=TCP1 PE=1 SV=1 - [TCPA_HUMAN]
P18124	60S ribosomal protein L7 OS=Homo sapiens GN=RPL7 PE=1 SV=1 - [RL7_HUMAN]
P20671	Histone H2A type 1-D OS=Homo sapiens GN=HIST1H2AD PE=1 SV=2 - [H2A1D_HUMAN]
P22234	Multifunctional protein ADE2 OS=Homo sapiens GN=PAICS PE=1 SV=3 - [PUR6_HUMAN]
P22626	Heterogeneous nuclear ribonucleoproteins A2/B1 OS=Homo sapiens GN=HNRNPA2B1 PE=1 SV=2 - [ROA2_HUMAN]
P24534	Elongation factor 1-beta OS=Homo sapiens GN=EEF1B2 PE=1 SV=3 - [EF1B_HUMAN]
P26373	60S ribosomal protein L13 OS=Homo sapiens GN=RPL13 PE=1 SV=4 - [RL13_HUMAN]
P26599	Polypyrimidine tract-binding protein 1 OS=Homo sapiens GN=PTBP1 PE=1 SV=1 - [PTBP1_HUMAN]
P26641	Elongation factor 1-gamma OS=Homo sapiens GN=EEF1G PE=1 SV=3 - [EF1G_HUMAN]
P29692	Elongation factor 1-delta OS=Homo sapiens GN=EEF1D PE=1 SV=5 - [EF1D_HUMAN]
P31943	Heterogeneous nuclear ribonucleoprotein H OS=Homo sapiens GN=HNRNPH1 PE=1 SV=4 - [HNRH1_HUMAN]
P35268	60S ribosomal protein L22 OS=Homo sapiens GN=RPL22 PE=1 SV=2 - [RL22_HUMAN]
P35520	Cystathionine beta-synthase OS=Homo sapiens GN=CBS PE=1 SV=2 - [CBS_HUMAN]
P35527	Keratin, type I cytoskeletal 9 OS=Homo sapiens GN=KRT9 PE=1 SV=3 - [K1C9_HUMAN]
P35637	RNA-binding protein FUS OS=Homo sapiens GN=FUS PE=1 SV=1 - [FUS_HUMAN]
P35659	Protein DEK OS=Homo sapiens GN=DEK PE=1 SV=1 - [DEK_HUMAN]
P35908	Keratin, type II cytoskeletal 2 epidermal OS=Homo sapiens GN=KRT2 PE=1 SV=2 - [K22E_HUMAN]
P36578	60S ribosomal protein L4 OS=Homo sapiens GN=RPL4 PE=1 SV=5 - [RL4_HUMAN]
P38159	RNA-binding motif protein, X chromosome OS=Homo sapiens GN=RBMX PE=1 SV=3 - [RBMX_HUMAN]
P38646	Stress-70 protein, mitochondrial OS=Homo sapiens GN=HSPA9 PE=1 SV=2 - [GRP75_HUMAN]
P39023	60S ribosomal protein L3 OS=Homo sapiens GN=RPL3 PE=1 SV=2 - [RL3_HUMAN]
P40227	T-complex protein 1 subunit zeta OS=Homo sapiens GN=CCT6A PE=1 SV=3 - [TCPZ_HUMAN]
P46777	60S ribosomal protein L5 OS=Homo sapiens GN=RPL5 PE=1 SV=3 - [RL5_HUMAN]
P48643	T-complex protein 1 subunit epsilon OS=Homo sapiens GN=CCT5 PE=1 SV=1 - [TCPE_HUMAN]
P49368	T-complex protein 1 subunit gamma OS=Homo sapiens GN=CCT3 PE=1 SV=4 - [TCPG_HUMAN]
P50750	Cyclin-dependent kinase 9 OS=Homo sapiens GN=CDK9 PE=1 SV=3 - [CDK9_HUMAN]
P50914	60S ribosomal protein L14 OS=Homo sapiens GN=RPL14 PE=1 SV=4 - [RL14_HUMAN]
P50990	T-complex protein 1 subunit theta OS=Homo sapiens GN=CCT8 PE=1 SV=4 - [TCPQ_HUMAN]
P50991	T-complex protein 1 subunit delta OS=Homo sapiens GN=CCT4 PE=1 SV=4 - [TCPD_HUMAN]
P57053	Histone H2B type F-S OS=Homo sapiens GN=H2BFS PE=1 SV=2 - [H2BFS_HUMAN]
P58876	Histone H2B type 1-D OS=Homo sapiens GN=HIST1H2BD PE=1 SV=2 - [H2B1D_HUMAN]
P60174	Triosephosphate isomerase OS=Homo sapiens GN=TPI1 PE=1 SV=3 - [TPIS_HUMAN]
P61978	Heterogeneous nuclear ribonucleoprotein K OS=Homo sapiens GN=HNRNPK PE=1 SV=1 - [HNRPK_HUMAN]
P62424	60S ribosomal protein L7a OS=Homo sapiens GN=RPL7A PE=1 SV=2 - [RL7A_HUMAN]
P62753	40S ribosomal protein S6 OS=Homo sapiens GN=RPS6 PE=1 SV=1 - [RS6_HUMAN]
P62807	Histone H2B type 1-C/E/F/G/I OS=Homo sapiens GN=HIST1H2BC PE=1 SV=4 - [H2B1C_HUMAN]
P62847	40S ribosomal protein S24 OS=Homo sapiens GN=RPS24 PE=1 SV=1 - [RS24_HUMAN]
P78371	T-complex protein 1 subunit beta OS=Homo sapiens GN=CCT2 PE=1 SV=4 - [TCPB_HUMAN]
Q02878	60S ribosomal protein L6 OS=Homo sapiens GN=RPL6 PE=1 SV=3 - [RL6_HUMAN]
Q06830	Peroxiredoxin-1 OS=Homo sapiens GN=PRDX1 PE=1 SV=1 - [PRDX1_HUMAN]
Q07020	60S ribosomal protein L18 OS=Homo sapiens GN=RPL18 PE=1 SV=2 - [RL18_HUMAN]
Q12905	Interleukin enhancer-binding factor 2 OS=Homo sapiens GN=ILF2 PE=1 SV=2 - [ILF2_HUMAN]
Q13765	Nascent polypeptide-associated complex subunit alpha OS=Homo sapiens GN=NACA PE=1 SV=1 - [NACA_HUMAN]
Q15019	Septin-2 OS=Homo sapiens GN=SEPT2 PE=1 SV=1 - [SEPT2_HUMAN]
Q15233	Non-POU domain-containing octamer-binding protein OS=Homo sapiens GN=NONO PE=1 SV=4 - [NONO_HUMAN]
Q16695	Histone H3.1t OS=Homo sapiens GN=HIST3H3 PE=1 SV=3 - [H31T_HUMAN]
Q5VTE0	Putative elongation factor 1-alpha-like 3 OS=Homo sapiens GN=EEF1A1P5 PE=5 SV=1 - [EF1A3_HUMAN]
Q6FI13	Histone H2A type 2-A OS=Homo sapiens GN=HIST2H2AA3 PE=1 SV=3 - [H2A2A_HUMAN]
Q86V81	THO complex subunit 4 OS=Homo sapiens GN=ALYREF PE=1 SV=3 - [THOC4_HUMAN]
Q8IYB1	Protein MB21D2 OS=Homo sapiens GN=MB21D2 PE=1 SV=3 - [M21D2_HUMAN]
Q92928	Putative Ras-related protein Rab-1C OS=Homo sapiens GN=RAB1C PE=5 SV=2 - [RAB1C_HUMAN]
Q93079	Histone H2B type 1-H OS=Homo sapiens GN=HIST1H2BH PE=1 SV=3 - [H2B1H_HUMAN]
Q96KK5	Histone H2A type 1-H OS=Homo sapiens GN=HIST1H2AH PE=1 SV=3 - [H2A1H_HUMAN]
Q99832	T-complex protein 1 subunit eta OS=Homo sapiens GN=CCT7 PE=1 SV=2 - [TCPH_HUMAN]
Q99877	Histone H2B type 1-N OS=Homo sapiens GN=HIST1H2BN PE=1 SV=3 - [H2B1N_HUMAN]
Q99878	Histone H2A type 1-J OS=Homo sapiens GN=HIST1H2AJ PE=1 SV=3 - [H2A1J_HUMAN]
Q99879	Histone H2B type 1-M OS=Homo sapiens GN=HIST1H2BM PE=1 SV=3 - [H2B1M_HUMAN]
Q99880	Histone H2B type 1-L OS=Homo sapiens GN=HIST1H2BL PE=1 SV=3 - [H2B1L_HUMAN]
Q9BY77	Polymerase delta-interacting protein 3 OS=Homo sapiens GN=POLDIP3 PE=1 SV=2 - [PDIP3_HUMAN]
Q9H0U4	Ras-related protein Rab-1B OS=Homo sapiens GN=RAB1B PE=1 SV=1 - [RAB1B_HUMAN]
Q9NZI8	Insulin-like growth factor 2 mRNA-binding protein 1 OS=Homo sapiens GN=IGF2BP1 PE=1 SV=2 - [IF2B1_HUMAN]

## Sheet: Sheet4
SN	protein name			edited
Q9UHB7	AF4/FMR2 family member 4 OS=Homo sapiens GN=AFF4 PE=1 SV=1 - [AFF4_HUMAN]
O60563	Cyclin-T1 OS=Homo sapiens GN=CCNT1 PE=1 SV=1 - [CCNT1_HUMAN]
O60814	Histone H2B type 1-K OS=Homo sapiens GN=HIST1H2BK PE=1 SV=3 - [H2B1K_HUMAN]
O95260	Arginyl-tRNA--protein transferase 1 OS=Homo sapiens GN=ATE1 PE=1 SV=2 - [ATE1_HUMAN]
P06748	Nucleophosmin OS=Homo sapiens GN=NPM1 PE=1 SV=2 - [NPM_HUMAN]
P07910	Heterogeneous nuclear ribonucleoproteins C1/C2 OS=Homo sapiens GN=HNRNPC PE=1 SV=4 - [HNRPC_HUMAN]
P08670	Vimentin OS=Homo sapiens GN=VIM PE=1 SV=4 - [VIME_HUMAN]
P09651	Heterogeneous nuclear ribonucleoprotein A1 OS=Homo sapiens GN=HNRNPA1 PE=1 SV=5 - [ROA1_HUMAN]
P0CG48	Polyubiquitin-C OS=Homo sapiens GN=UBC PE=1 SV=3 - [UBC_HUMAN]
P10412	Histone H1.4 OS=Homo sapiens GN=HIST1H1E PE=1 SV=2 - [H14_HUMAN]
P12277	Creatine kinase B-type OS=Homo sapiens GN=CKB PE=1 SV=1 - [KCRB_HUMAN]
P12956	X-ray repair cross-complementing protein 6 OS=Homo sapiens GN=XRCC6 PE=1 SV=2 - [XRCC6_HUMAN]
P13010	X-ray repair cross-complementing protein 5 OS=Homo sapiens GN=XRCC5 PE=1 SV=3 - [XRCC5_HUMAN]
P14868	Aspartate--tRNA ligase, cytoplasmic OS=Homo sapiens GN=DARS PE=1 SV=2 - [SYDC_HUMAN]
P16402	Histone H1.3 OS=Homo sapiens GN=HIST1H1D PE=1 SV=2 - [H13_HUMAN]
P16403	Histone H1.2 OS=Homo sapiens GN=HIST1H1C PE=1 SV=2 - [H12_HUMAN]
P17987	T-complex protein 1 subunit alpha OS=Homo sapiens GN=TCP1 PE=1 SV=1 - [TCPA_HUMAN]
P20671	Histone H2A type 1-D OS=Homo sapiens GN=HIST1H2AD PE=1 SV=2 - [H2A1D_HUMAN]
P22234	Multifunctional protein ADE2 OS=Homo sapiens GN=PAICS PE=1 SV=3 - [PUR6_HUMAN]
P22626	Heterogeneous nuclear ribonucleoproteins A2/B1 OS=Homo sapiens GN=HNRNPA2B1 PE=1 SV=2 - [ROA2_HUMAN]
P24534	Elongation factor 1-beta OS=Homo sapiens GN=EEF1B2 PE=1 SV=3 - [EF1B_HUMAN]
P26641	Elongation factor 1-gamma OS=Homo sapiens GN=EEF1G PE=1 SV=3 - [EF1G_HUMAN]
P29692	Elongation factor 1-delta OS=Homo sapiens GN=EEF1D PE=1 SV=5 - [EF1D_HUMAN]
P31943	Heterogeneous nuclear ribonucleoprotein H OS=Homo sapiens GN=HNRNPH1 PE=1 SV=4 - [HNRH1_HUMAN]
P35637	RNA-binding protein FUS OS=Homo sapiens GN=FUS PE=1 SV=1 - [FUS_HUMAN]
P35659	Protein DEK OS=Homo sapiens GN=DEK PE=1 SV=1 - [DEK_HUMAN]
P38159	RNA-binding motif protein, X chromosome OS=Homo sapiens GN=RBMX PE=1 SV=3 - [RBMX_HUMAN]
P40227	T-complex protein 1 subunit zeta OS=Homo sapiens GN=CCT6A PE=1 SV=3 - [TCPZ_HUMAN]
P48643	T-complex protein 1 subunit epsilon OS=Homo sapiens GN=CCT5 PE=1 SV=1 - [TCPE_HUMAN]
P49368	T-complex protein 1 subunit gamma OS=Homo sapiens GN=CCT3 PE=1 SV=4 - [TCPG_HUMAN]
P50750	Cyclin-dependent kinase 9 OS=Homo sapiens GN=CDK9 PE=1 SV=3 - [CDK9_HUMAN]
P50990	T-complex protein 1 subunit theta OS=Homo sapiens GN=CCT8 PE=1 SV=4 - [TCPQ_HUMAN]
P50991	T-complex protein 1 subunit delta OS=Homo sapiens GN=CCT4 PE=1 SV=4 - [TCPD_HUMAN]
P57053	Histone H2B type F-S OS=Homo sapiens GN=H2BFS PE=1 SV=2 - [H2BFS_HUMAN]
P58876	Histone H2B type 1-D OS=Homo sapiens GN=HIST1H2BD PE=1 SV=2 - [H2B1D_HUMAN]
P61978	Heterogeneous nuclear ribonucleoprotein K OS=Homo sapiens GN=HNRNPK PE=1 SV=1 - [HNRPK_HUMAN]
P62807	Histone H2B type 1-C/E/F/G/I OS=Homo sapiens GN=HIST1H2BC PE=1 SV=4 - [H2B1C_HUMAN]
P78371	T-complex protein 1 subunit beta OS=Homo sapiens GN=CCT2 PE=1 SV=4 - [TCPB_HUMAN]
Q12905	Interleukin enhancer-binding factor 2 OS=Homo sapiens GN=ILF2 PE=1 SV=2 - [ILF2_HUMAN]
Q13765	Nascent polypeptide-associated complex subunit alpha OS=Homo sapiens GN=NACA PE=1 SV=1 - [NACA_HUMAN]
Q15233	Non-POU domain-containing octamer-binding protein OS=Homo sapiens GN=NONO PE=1 SV=4 - [NONO_HUMAN]
Q16695	Histone H3.1t OS=Homo sapiens GN=HIST3H3 PE=1 SV=3 - [H31T_HUMAN]
Q5VTE0	Putative elongation factor 1-alpha-like 3 OS=Homo sapiens GN=EEF1A1P5 PE=5 SV=1 - [EF1A3_HUMAN]
Q6FI13	Histone H2A type 2-A OS=Homo sapiens GN=HIST2H2AA3 PE=1 SV=3 - [H2A2A_HUMAN]
Q86V81	THO complex subunit 4 OS=Homo sapiens GN=ALYREF PE=1 SV=3 - [THOC4_HUMAN]
Q8IYB1	Protein MB21D2 OS=Homo sapiens GN=MB21D2 PE=1 SV=3 - [M21D2_HUMAN]
Q92928	Putative Ras-related protein Rab-1C OS=Homo sapiens GN=RAB1C PE=5 SV=2 - [RAB1C_HUMAN]
Q93079	Histone H2B type 1-H OS=Homo sapiens GN=HIST1H2BH PE=1 SV=3 - [H2B1H_HUMAN]
Q96KK5	Histone H2A type 1-H OS=Homo sapiens GN=HIST1H2AH PE=1 SV=3 - [H2A1H_HUMAN]
Q99832	T-complex protein 1 subunit eta OS=Homo sapiens GN=CCT7 PE=1 SV=2 - [TCPH_HUMAN]
Q99877	Histone H2B type 1-N OS=Homo sapiens GN=HIST1H2BN PE=1 SV=3 - [H2B1N_HUMAN]
Q99878	Histone H2A type 1-J OS=Homo sapiens GN=HIST1H2AJ PE=1 SV=3 - [H2A1J_HUMAN]
Q99879	Histone H2B type 1-M OS=Homo sapiens GN=HIST1H2BM PE=1 SV=3 - [H2B1M_HUMAN]
Q99880	Histone H2B type 1-L OS=Homo sapiens GN=HIST1H2BL PE=1 SV=3 - [H2B1L_HUMAN]
Q9BY77	Polymerase delta-interacting protein 3 OS=Homo sapiens GN=POLDIP3 PE=1 SV=2 - [PDIP3_HUMAN]
Q9H0U4	Ras-related protein Rab-1B OS=Homo sapiens GN=RAB1B PE=1 SV=1 - [RAB1B_HUMAN]
Q9NZI8	Insulin-like growth factor 2 mRNA-binding protein 1 OS=Homo sapiens GN=IGF2BP1 PE=1 SV=2 - [IF2B1_HUMAN]

## Sheet: Sheet5
Q9UHB7	AF4/FMR2 family member 4 OS=Homo sapiens GN=AFF4 PE=1 SV=1 - [AFF4_HUMAN]									no ubiquitin
O60563	Cyclin-T1 OS=Homo sapiens GN=CCNT1 PE=1 SV=1 - [CCNT1_HUMAN]
O60814	Histone H2B type 1-K OS=Homo sapiens GN=HIST1H2BK PE=1 SV=3 - [H2B1K_HUMAN]
P06748	Nucleophosmin OS=Homo sapiens GN=NPM1 PE=1 SV=2 - [NPM_HUMAN]
P07910	Heterogeneous nuclear ribonucleoproteins C1/C2 OS=Homo sapiens GN=HNRNPC PE=1 SV=4 - [HNRPC_HUMAN]
P09651	Heterogeneous nuclear ribonucleoprotein A1 OS=Homo sapiens GN=HNRNPA1 PE=1 SV=5 - [ROA1_HUMAN]
P10412	Histone H1.4 OS=Homo sapiens GN=HIST1H1E PE=1 SV=2 - [H14_HUMAN]
P12956	X-ray repair cross-complementing protein 6 OS=Homo sapiens GN=XRCC6 PE=1 SV=2 - [XRCC6_HUMAN]
P13010	X-ray repair cross-complementing protein 5 OS=Homo sapiens GN=XRCC5 PE=1 SV=3 - [XRCC5_HUMAN]
P14868	Aspartate--tRNA ligase, cytoplasmic OS=Homo sapiens GN=DARS PE=1 SV=2 - [SYDC_HUMAN]
P16402	Histone H1.3 OS=Homo sapiens GN=HIST1H1D PE=1 SV=2 - [H13_HUMAN]
P16403	Histone H1.2 OS=Homo sapiens GN=HIST1H1C PE=1 SV=2 - [H12_HUMAN]
P17987	T-complex protein 1 subunit alpha OS=Homo sapiens GN=TCP1 PE=1 SV=1 - [TCPA_HUMAN]
P20671	Histone H2A type 1-D OS=Homo sapiens GN=HIST1H2AD PE=1 SV=2 - [H2A1D_HUMAN]
P22234	Multifunctional protein ADE2 OS=Homo sapiens GN=PAICS PE=1 SV=3 - [PUR6_HUMAN]
P22626	Heterogeneous nuclear ribonucleoproteins A2/B1 OS=Homo sapiens GN=HNRNPA2B1 PE=1 SV=2 - [ROA2_HUMAN]
P24534	Elongation factor 1-beta OS=Homo sapiens GN=EEF1B2 PE=1 SV=3 - [EF1B_HUMAN]
P26641	Elongation factor 1-gamma OS=Homo sapiens GN=EEF1G PE=1 SV=3 - [EF1G_HUMAN]
P29692	Elongation factor 1-delta OS=Homo sapiens GN=EEF1D PE=1 SV=5 - [EF1D_HUMAN]
P31943	Heterogeneous nuclear ribonucleoprotein H OS=Homo sapiens GN=HNRNPH1 PE=1 SV=4 - [HNRH1_HUMAN]
P35637	RNA-binding protein FUS OS=Homo sapiens GN=FUS PE=1 SV=1 - [FUS_HUMAN]
P35659	Protein DEK OS=Homo sapiens GN=DEK PE=1 SV=1 - [DEK_HUMAN]
P38159	RNA-binding motif protein, X chromosome OS=Homo sapiens GN=RBMX PE=1 SV=3 - [RBMX_HUMAN]
P40227	T-complex protein 1 subunit zeta OS=Homo sapiens GN=CCT6A PE=1 SV=3 - [TCPZ_HUMAN]
P48643	T-complex protein 1 subunit epsilon OS=Homo sapiens GN=CCT5 PE=1 SV=1 - [TCPE_HUMAN]
P49368	T-complex protein 1 subunit gamma OS=Homo sapiens GN=CCT3 PE=1 SV=4 - [TCPG_HUMAN]
P50750	Cyclin-dependent kinase 9 OS=Homo sapiens GN=CDK9 PE=1 SV=3 - [CDK9_HUMAN]
P50990	T-complex protein 1 subunit theta OS=Homo sapiens GN=CCT8 PE=1 SV=4 - [TCPQ_HUMAN]
P50991	T-complex protein 1 subunit delta OS=Homo sapiens GN=CCT4 PE=1 SV=4 - [TCPD_HUMAN]
P57053	Histone H2B type F-S OS=Homo sapiens GN=H2BFS PE=1 SV=2 - [H2BFS_HUMAN]
P58876	Histone H2B type 1-D OS=Homo sapiens GN=HIST1H2BD PE=1 SV=2 - [H2B1D_HUMAN]
P61978	Heterogeneous nuclear ribonucleoprotein K OS=Homo sapiens GN=HNRNPK PE=1 SV=1 - [HNRPK_HUMAN]
P62807	Histone H2B type 1-C/E/F/G/I OS=Homo sapiens GN=HIST1H2BC PE=1 SV=4 - [H2B1C_HUMAN]
P78371	T-complex protein 1 subunit beta OS=Homo sapiens GN=CCT2 PE=1 SV=4 - [TCPB_HUMAN]
Q12905	Interleukin enhancer-binding factor 2 OS=Homo sapiens GN=ILF2 PE=1 SV=2 - [ILF2_HUMAN]
Q13765	Nascent polypeptide-associated complex subunit alpha OS=Homo sapiens GN=NACA PE=1 SV=1 - [NACA_HUMAN]
Q15233	Non-POU domain-containing octamer-binding protein OS=Homo sapiens GN=NONO PE=1 SV=4 - [NONO_HUMAN]
Q16695	Histone H3.1t OS=Homo sapiens GN=HIST3H3 PE=1 SV=3 - [H31T_HUMAN]
Q5VTE0	Putative elongation factor 1-alpha-like 3 OS=Homo sapiens GN=EEF1A1P5 PE=5 SV=1 - [EF1A3_HUMAN]
Q6FI13	Histone H2A type 2-A OS=Homo sapiens GN=HIST2H2AA3 PE=1 SV=3 - [H2A2A_HUMAN]
Q86V81	THO complex subunit 4 OS=Homo sapiens GN=ALYREF PE=1 SV=3 - [THOC4_HUMAN]
Q8IYB1	Protein MB21D2 OS=Homo sapiens GN=MB21D2 PE=1 SV=3 - [M21D2_HUMAN]
Q93079	Histone H2B type 1-H OS=Homo sapiens GN=HIST1H2BH PE=1 SV=3 - [H2B1H_HUMAN]
Q96KK5	Histone H2A type 1-H OS=Homo sapiens GN=HIST1H2AH PE=1 SV=3 - [H2A1H_HUMAN]
Q99832	T-complex protein 1 subunit eta OS=Homo sapiens GN=CCT7 PE=1 SV=2 - [TCPH_HUMAN]
Q99877	Histone H2B type 1-N OS=Homo sapiens GN=HIST1H2BN PE=1 SV=3 - [H2B1N_HUMAN]
Q99878	Histone H2A type 1-J OS=Homo sapiens GN=HIST1H2AJ PE=1 SV=3 - [H2A1J_HUMAN]
Q99879	Histone H2B type 1-M OS=Homo sapiens GN=HIST1H2BM PE=1 SV=3 - [H2B1M_HUMAN]
Q99880	Histone H2B type 1-L OS=Homo sapiens GN=HIST1H2BL PE=1 SV=3 - [H2B1L_HUMAN]
Q9BY77	Polymerase delta-interacting protein 3 OS=Homo sapiens GN=POLDIP3 PE=1 SV=2 - [PDIP3_HUMAN]
Q9NZI8	Insulin-like growth factor 2 mRNA-binding protein 1 OS=Homo sapiens GN=IGF2BP1 PE=1 SV=2 - [IF2B1_HUMAN]

## Sheet: Sheet6
Q9UHB7	AF4/FMR2 family member 4 OS=Homo sapiens GN=AFF4 PE=1 SV=1 - [AFF4_HUMAN]										no histones
O60563	Cyclin-T1 OS=Homo sapiens GN=CCNT1 PE=1 SV=1 - [CCNT1_HUMAN]
P06748	Nucleophosmin OS=Homo sapiens GN=NPM1 PE=1 SV=2 - [NPM_HUMAN]
P07910	Heterogeneous nuclear ribonucleoproteins C1/C2 OS=Homo sapiens GN=HNRNPC PE=1 SV=4 - [HNRPC_HUMAN]
P09651	Heterogeneous nuclear ribonucleoprotein A1 OS=Homo sapiens GN=HNRNPA1 PE=1 SV=5 - [ROA1_HUMAN]
P12956	X-ray repair cross-complementing protein 6 OS=Homo sapiens GN=XRCC6 PE=1 SV=2 - [XRCC6_HUMAN]
P13010	X-ray repair cross-complementing protein 5 OS=Homo sapiens GN=XRCC5 PE=1 SV=3 - [XRCC5_HUMAN]
P14868	Aspartate--tRNA ligase, cytoplasmic OS=Homo sapiens GN=DARS PE=1 SV=2 - [SYDC_HUMAN]
P17987	T-complex protein 1 subunit alpha OS=Homo sapiens GN=TCP1 PE=1 SV=1 - [TCPA_HUMAN]
P22234	Multifunctional protein ADE2 OS=Homo sapiens GN=PAICS PE=1 SV=3 - [PUR6_HUMAN]
P22626	Heterogeneous nuclear ribonucleoproteins A2/B1 OS=Homo sapiens GN=HNRNPA2B1 PE=1 SV=2 - [ROA2_HUMAN]
P24534	Elongation factor 1-beta OS=Homo sapiens GN=EEF1B2 PE=1 SV=3 - [EF1B_HUMAN]
P26641	Elongation factor 1-gamma OS=Homo sapiens GN=EEF1G PE=1 SV=3 - [EF1G_HUMAN]
P29692	Elongation factor 1-delta OS=Homo sapiens GN=EEF1D PE=1 SV=5 - [EF1D_HUMAN]
P31943	Heterogeneous nuclear ribonucleoprotein H OS=Homo sapiens GN=HNRNPH1 PE=1 SV=4 - [HNRH1_HUMAN]
P35637	RNA-binding protein FUS OS=Homo sapiens GN=FUS PE=1 SV=1 - [FUS_HUMAN]
P38159	RNA-binding motif protein, X chromosome OS=Homo sapiens GN=RBMX PE=1 SV=3 - [RBMX_HUMAN]
P40227	T-complex protein 1 subunit zeta OS=Homo sapiens GN=CCT6A PE=1 SV=3 - [TCPZ_HUMAN]
P48643	T-complex protein 1 subunit epsilon OS=Homo sapiens GN=CCT5 PE=1 SV=1 - [TCPE_HUMAN]
P49368	T-complex protein 1 subunit gamma OS=Homo sapiens GN=CCT3 PE=1 SV=4 - [TCPG_HUMAN]
P50750	Cyclin-dependent kinase 9 OS=Homo sapiens GN=CDK9 PE=1 SV=3 - [CDK9_HUMAN]
P50990	T-complex protein 1 subunit theta OS=Homo sapiens GN=CCT8 PE=1 SV=4 - [TCPQ_HUMAN]
P50991	T-complex protein 1 subunit delta OS=Homo sapiens GN=CCT4 PE=1 SV=4 - [TCPD_HUMAN]
P61978	Heterogeneous nuclear ribonucleoprotein K OS=Homo sapiens GN=HNRNPK PE=1 SV=1 - [HNRPK_HUMAN]
P78371	T-complex protein 1 subunit beta OS=Homo sapiens GN=CCT2 PE=1 SV=4 - [TCPB_HUMAN]
Q13765	Nascent polypeptide-associated complex subunit alpha OS=Homo sapiens GN=NACA PE=1 SV=1 - [NACA_HUMAN]
Q15233	Non-POU domain-containing octamer-binding protein OS=Homo sapiens GN=NONO PE=1 SV=4 - [NONO_HUMAN]
Q5VTE0	Putative elongation factor 1-alpha-like 3 OS=Homo sapiens GN=EEF1A1P5 PE=5 SV=1 - [EF1A3_HUMAN]
Q86V81	THO complex subunit 4 OS=Homo sapiens GN=ALYREF PE=1 SV=3 - [THOC4_HUMAN]
Q8IYB1	Protein MB21D2 OS=Homo sapiens GN=MB21D2 PE=1 SV=3 - [M21D2_HUMAN]
Q99832	T-complex protein 1 subunit eta OS=Homo sapiens GN=CCT7 PE=1 SV=2 - [TCPH_HUMAN]
Q9BY77	Polymerase delta-interacting protein 3 OS=Homo sapiens GN=POLDIP3 PE=1 SV=2 - [PDIP3_HUMAN]
